# Supplementary material
Source: PubMed Central journal article supplement (PMC3907244)
Supplement: mmc2.pdf [file mmc2.pdf]

# Delays Induce Novel Stochastic Effects in Negative Feedback Gene Circuits

Eder Zavala and Tatiana T. Marquez-Lago\*

Integrative Systems Biology Unit, Okinawa Institute of Science and Technology, Okinawa, Japan

**ABSTRACT** Stochastic models of reaction networks are widely used to depict gene expression dynamics. However, *stochastic* does not necessarily imply *accurate*, as subtle assumptions can yield erroneous results, masking key discrete effects. For instance, transcription and translation are not instantaneous processes—explicit delays separate their initiation from the appearance of their functional products. However, delays are often ignored in stochastic, single-gene expression models. By consequence, effects such as delay-induced stochastic oscillations at the single-cell level have remained relatively unexplored. Here, we present a systematic study of periodicity and multimodality in a simple gene circuit with negative feedback, analyzing the influence of negative feedback strength and transcriptional/translational delays on expression dynamics. We demonstrate that an oscillatory regime emerges through a Hopf bifurcation in both deterministic and stochastic frameworks. Of importance, a shift in the stochastic Hopf bifurcation evidences inaccuracies of the deterministic bifurcation analysis. Furthermore, noise fluctuations within stochastic oscillations decrease alongside increasing values of transcriptional delays and within a specific range of negative feedback strengths, whereas a strong feedback is associated with oscillations triggered by bursts. Finally, we demonstrate that explicitly accounting for delays increases the number of accessible states in the multimodal regime, and also introduces features typical of excitable systems.

## INTRODUCTION

Negative feedback loops are ubiquitous features of biological regulatory networks. They are essential ingredients of gene expression and cell signaling, and are largely responsible for generating oscillations (1,2) and modulating noise (3–7), among other functions. Feedback loops are composed of interconnected biochemical reactions, which are discrete and random by nature. Thus, out of all theoretical frameworks, models taking reaction discreteness and randomness into account will always yield more accurate results. Moreover, stochastic discrete models often predict behaviors impossible to obtain with deterministic models. Such stochastic discrete effects include, but are not limited to, noise amplification/attenuation (5–9), bursty expression (7,8,10–12), stochastic resonance (13,14), stochastic focusing (15), stochastic-induced oscillations (14,16,17), and multimodality (7,10,18).

For many years, negative feedback regulation was thought to imply noise reduction (9,19,20). However, recent works (6,7) revealed contrary observations, leaving a question mark over the relationship between gene expression heterogeneity and negative regulation. In (7), a set of simple gene circuits was studied to assess the relationship between noise characteristics and negative feedback strength. There, it was shown that subtle mathematical properties in the modeling

framework result in widely distinct expression profiles. In particular, both lumping of transcription-translation reactions and quasi-steady-state assumptions proved to be detrimental for a proper description of noise modulation. Additionally, it was found that bursts and multimodality can be observed in networks with identical architecture that only differ in terms of feedback strength and specific kinetic parameters.

However, a systematic exploration of the roles of transcriptional and translational delays alongside stochastic feedback regulation remained to be seen. Such analysis becomes necessary because explicit delays can reveal dynamics that nondelayed models fail to predict (e.g., oscillations and excitability), independently of whether the modeling approach is deterministic or stochastic (1,21–25). Delays are commonly used to account for the duration of reactions whose kinetic details are often ignored. This strategy significantly reduces the number of equations in the model, although still capturing the essence of the phenomenon by following the dynamics of molecular species of interest (26). Moreover, exact model reduction techniques using distributed delays were recently studied, showing how an exact match between a delayed reaction (with a constant delay) and a nondelayed reaction (with a constant reaction rate) can never be obtained (26). Thus, proposed models exchanging explicit delays with slow rates of reaction may easily yield inaccurate representations of chemical systems of interest.

Thereby, it is natural to ask: how many of the observed properties in gene expression models, such as noise buffering and multimodality would hold if one explicitly accounts for transcriptional and translational delays? And, would introduction of explicit transcriptional and translational delays yield new nonclassic stochastic effects, not

---

Submitted August 9, 2013, and accepted for publication December 6, 2013.

\*Correspondence: [tatiana.marquez@oist.jp](mailto:tatiana.marquez@oist.jp)

This is an Open Access article distributed under the terms of the Creative Commons-Attribution Noncommercial License (<http://creativecommons.org/licenses/by-nc/2.0/>), which permits unrestricted noncommercial use, distribution, and reproduction in any medium, provided the original work is properly cited.

Editor: James Sneyd.

© 2014 The Authors

0006-3495/14/01/0467/12 \$2.00

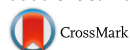

---

<http://dx.doi.org/10.1016/j.bpj.2013.12.010>

yet observed? To answer these questions, we consider a prototypical gene circuit that accounts for transcription, translation, and protein dimerization (Fig. 1). In our system, the dimer acts as a transcription repressor upon binding DNA, resulting in a negative feedback loop at the gene level. Furthermore, we consider explicit delays due to transcription and translation, and identify ranges where sustained oscillations are to be expected.

It is worth noting that reaction delays are commonly associated with oscillations in negative self-regulation systems (1,2,27), but the particular way in which oscillations emerge depends on the network architecture as well as the parameter values. In our case, a Hopf bifurcation is the simplest mechanism by which our minimalistic gene circuit could oscillate, but asserting its existence is not straightforward. Separately, stochastic descriptions of gene regulatory networks (GRNs) often exhibit behaviors absent in their deterministic counterparts, such as oscillations, bistability, and bursts (17,21,28–30). Furthermore, noise-induced oscillations without delays have been demonstrated before (14,16,17). Whether this and other behaviors with no deterministic counterpart may be occurring in systems such as Fig. 1 needs to be determined.

After briefly pointing out the differences between deterministic and stochastic descriptions of the circuit, we carry out a systematic study on the role of negative feedback, delays, and kinetic parameters on stochastic gene expression profiles. In agreement with other models (1,21,22,25), oscillations were observed when considering significantly long

delays. However, we show the onset of oscillations is quite distinct at low and high feedback strengths, involving a Hopf bifurcation in the former and bursty expression in the latter. Even though the deterministic Hopf bifurcation is mathematically well defined (see the Supporting Material (31)), its stochastic definition is still in development. Here, we used the most recent definition based on the changing shape of the system's stationary distribution under parameter variations. This definition states that, for a stochastic planar autonomous system, a stochastic Hopf bifurcation appears when the shape of its stationary distribution changes from peak-like to crater-like (32). The latter implies the oscillatory regime has associated marginal stationary distributions that are bimodal functions; a fact that we will show is in full agreement with the shape of distributions in our work.

Finally, when compared to the deterministic analysis, we find the stochastic Hopf bifurcation to be shifted in parameter space (33,34). Furthermore, we demonstrate that this very simple gene circuit can also exhibit multimodality, just as its nondelayed stochastic counterpart (7). However, transcriptional delays play a very interesting role in shaping such multimodal behavior. On the one hand, it increases the number of modes that the system can visit (i.e., states otherwise inaccessible without the use of delays). On the other, it modifies expression dynamics significantly, exhibiting characteristics typical of excitable systems (35).

## MATERIALS AND METHODS

### System reactions and model parameters

For this study, we chose a generalized gene expression circuit consisting of transcription, translation, degradation, and dimerization reactions. The circuit architecture in Fig. 1 corresponds to the following set of model reactions

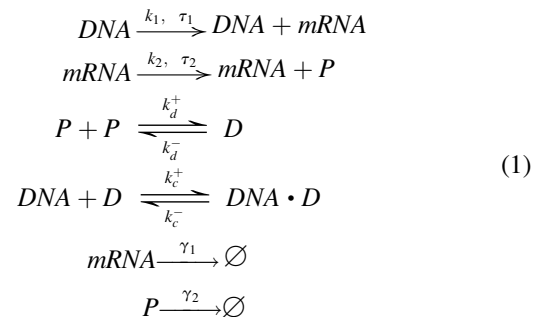

where  $k_1$  and  $k_2$  represent the transcription and translation rates, respectively. Dimer association/dissociation rates are denoted by  $k_d^+$  and  $k_d^-$ ; a dimer binds and unbinds DNA at rates  $k_c^+$  and  $k_c^-$ ; whereas mRNA and protein turnover are represented by rates  $\gamma_1$  and  $\gamma_2$ , respectively. For delayed reactions, constant delays  $\tau_1$  and  $\tau_2$  were chosen to represent transcription and translation processes. A full derivation of the corresponding deterministic and stochastic models can be found in the Supporting Material.

We considered uniform initial conditions of 1, 1, 100, 0, and 0 molecules of DNA, mRNA, protein, dimer, and the repression complex (dimer-bound DNA), respectively. As we focused on the expression of a single gene in one

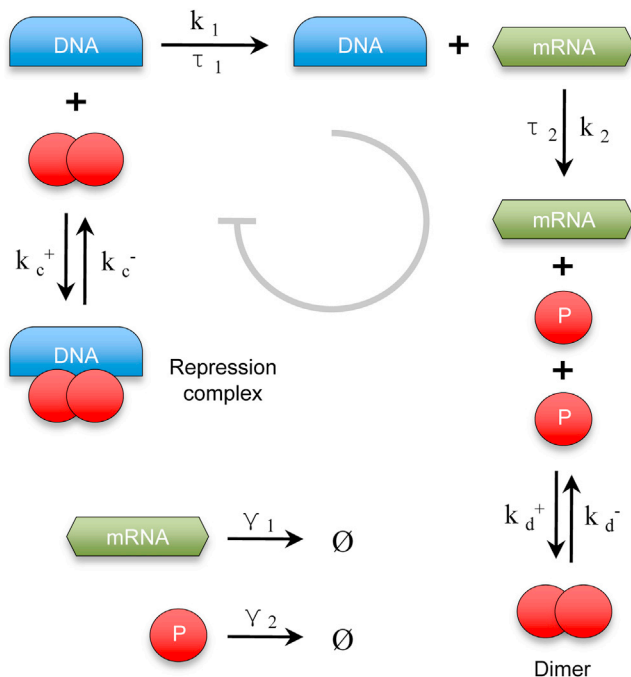

FIGURE 1 Simple gene regulatory circuit portraying transcription, translation, and dimerization. Transcription and translation are treated as delayed reactions. The dimer binds reversibly to DNA and repress transcription, resulting in a negative feedback loop.

single cell, we used a volume of 1 fL, equivalent to a typical *Escherichia coli* cell volume (36). To check if our observations hold for volumes as large as those found in unicellular eukaryotes, we also carried out simulations considering a volume of 37 fL, equivalent to a typical *Saccharomyces cerevisiae* cell volume (37) (see the [Supporting Material](#)). Proper conversion to molarity units for the deterministic model was implemented whenever necessary.

Following (7), we used parameter  $\alpha = k_c^+/k_c^-$  to account for the negative feedback strength. The latter was varied over eight orders of magnitude and, together with the transcriptional delay, constituted the main parameters under study. Of importance, these parameters were used for both the deterministic and stochastic analyses and tuned within the same ranges, making both cases comparable. Two basic parameter sets were used for all simulations. One set for oscillatory regime simulations and one for multimodal expression profiles (respectively, [Table S1](#) and [Table S2](#)). All parameter values were fixed within biologically feasible ranges (7) ([Table S3](#)).

The transcriptional delay  $\tau_1$  was defined as the elapsed time since transcription initiation up to the appearance of the corresponding mature mRNA. This accounts for intermediate reactions like transcript elongation, editing, and other processes not considered explicitly in our model. In a similar way, the translational delay  $\tau_2$  was defined as the time since translation initiation up to the appearance of the corresponding mature protein (but before dimerization). We used the ranges  $\tau_1 \in [0, 1200]$  s and  $\tau_2 \in [0, 150]$  s. To fully assess the effects of introducing delays, we decided to tune them from zero to the upper limits estimated in (22). This choice eases extrapolation of our results to higher delay values, typical of eukaryotic cells where mRNA and protein require further processing and transport between cell compartments.

## Bifurcation analysis and numerical solutions

A set of delay differential equations (DDEs) was used to model deterministic dynamics. The bifurcation analysis was performed using DDE-BIF-TOOL (38) for continuation and identification of the Hopf bifurcation ([Fig. S1](#)). To compute bifurcation diagrams, the numerical step-size and number of branch points were optimized to achieve maximum resolution while completing the calculation in a reasonable amount of time. Given the subtle dependency of DDEs on its history and delay values, we verified our results using XPPAUT (39) and MATLAB dde23 (The MathWorks, Natick, MA) ([Fig. S1 F](#) and [Fig. S2, A, C, E, and G](#)).

## Stochastic simulations and analysis

Biochemical reactions are discrete and random by nature. Thus, systems of delayed chemical reactions are accurately described by the delay chemical master equation (DCME). The validity of the DCME demands a well-stirred system in thermal equilibrium. It ignores spatial information, solely accounting for molecule numbers uniformly distributed throughout a constant volume (40,41). Nevertheless, it is worth noting one may also use delays to account for spatial, nonhomogeneous processes (42), a topic that lies outside the scope of this work. Currently, our system in consideration contains extremely low numbers of molecules. Thus, solving an associated stochastic DDE (e.g., the Langevin approximation) is not an option, as this approach is only valid at high concentrations where no discrete effects are expected. Therefore, we must retort to using the DCME.

Even though the DCME cannot be solved analytically, it is possible to calculate independent exact trajectories belonging to it through an exact delay stochastic simulation algorithm (DSSA). Here, we carry out single cell simulations using an implementation of the DSSA based in the reaction rejection method (21) ([Fig. S3](#)). It has been demonstrated in (43), that this method yields exact trajectories according to the DCME, therefore we do not introduce any approximations. In this way, we avoid using perturbed DDEs and unnecessary assumptions about noise that may shadow dynamical subtleties in our system. In our simulations, reactants and products are

updated simultaneously only after a delay marks the reaction completion. Nondelayed simulations were verified by means of the stochastic simulation algorithm (SSA) direct method (44).

Within each parameter set describing a dynamical regime ([Table S1](#) and [Table S2](#)), parameter sweeps were performed for one parameter at a time, leaving all others fixed. We carried out 100 simulations for each combination of feedback strength and delay values. For each simulation,  $10^6$  equally spaced time points were collected. These simulations were used to estimate stationary probability density functions (PDFs) as well as period, amplitude, and time autocorrelation half-life distributions. PDFs were calculated by computing normalized histogram distributions and verified by MATLAB kernel smoothing function estimators. Contoured PDFs were obtained from individual PDFs using MATLAB's interpolating algorithms.

To calculate amplitude, period, and autocorrelation half-life distributions, the stochastic time course trajectories were smoothed using a moving averages algorithm. The size of the smoothing window was fixed at 9 neighbors for mRNA and 21 for protein and dimer, and these values were kept identical for all trajectories analyzed.

## RESULTS AND DISCUSSION

### Oscillatory gene expression is induced by delays

Several studies of delay-induced oscillations in GRNs exist for both deterministic and stochastic models (17,21,22,28). However, none so far systematically explored the relationship between negative feedback and delays as a means to induce oscillations through a Hopf bifurcation. To fill this gap, we first computed a dynamical portrait of the system by means of a continuous deterministic model. It is worth emphasizing qualitative predictions of the deterministic model were only used as a starting point to a more systematic study using discrete stochastic simulations.

We then performed a bifurcation analysis on the deterministic model of our gene circuit ([Eq. S2](#)). To explore the onset of oscillations, we used the parameter values shown in [Table S1](#). Furthermore, we chose three bifurcation parameters: the feedback strength  $\alpha$ , and transcriptional and translational delays denoted by  $\tau_1$  and  $\tau_2$ , respectively. Although the feedback strength was varied over a very wide range, a periodic solution was found only within  $\alpha \in [10^7, 10^{15}] \text{ M}^{-1}$ . The delays were varied within the ranges reported in [Table S3](#).

The result of our analysis is shown in [Fig. 2](#), where a two-parameter ( $\tau_1, \alpha$ ) bifurcation diagram illustrates the boundary between regions where the system exhibits a stable steady-state solution (monostability) versus self-sustained oscillations. Of importance, we found these boundaries correspond to points in parameter space where a single, stable steady-state solution loses its stability and a limit-cycle emerges ([Fig. S1](#)), thus defining Hopf bifurcation branches. Therefore, the onset of oscillations in a deterministic model of our gene circuit occurs through a Hopf bifurcation.

From [Fig. 2](#), it can be readily observed that oscillations are precluded from regions of very weak and very high feedback strength, whenever both delays are small. Conversely, intermediate feedback strengths ( $\alpha \in [10^{10}, 10^{13}] \text{ M}^{-1}$ )

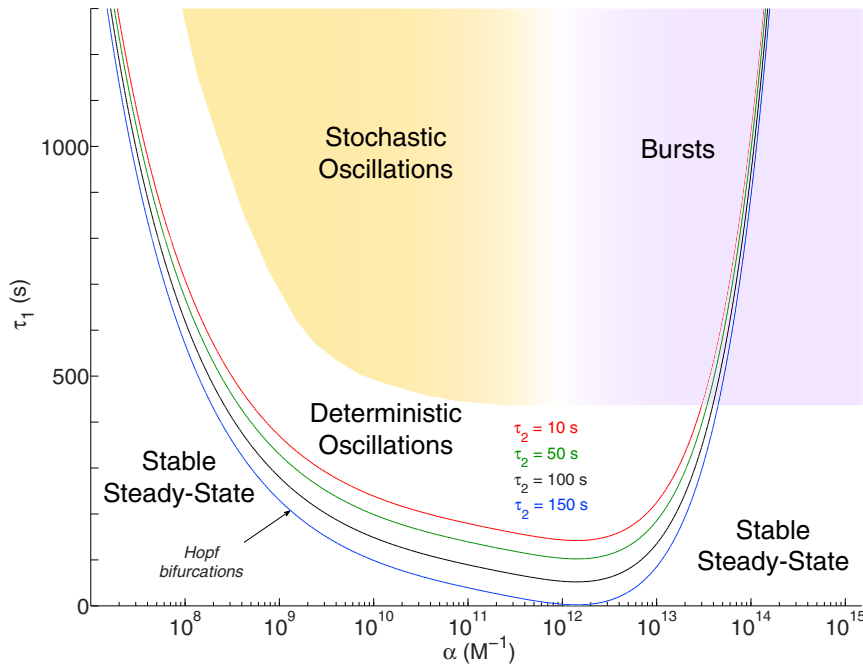

FIGURE 2 Two-parameter ( $\tau_1$ ,  $\alpha$ ) bifurcation diagram. A series of Hopf bifurcation branches separate the oscillatory regime (*above*) from the steady-state solution (*below*). Color-coded boundaries represent calculated branches corresponding to different values of  $\tau_2$ . The boundary defined by the Hopf branch at  $\tau_2 = 100$  s was used to compare against stochastic predictions (*shaded areas*).

allow for periodic solutions whenever the transcriptional delay  $\tau_1$  lies above the Hopf branch delineated by the translation delay  $\tau_2$ . As a general rule, feedback strength intervals allowing for the occurrence of oscillations become wider alongside increasing values of the transcriptional delay  $\tau_1$ . The same applies for translational delays  $\tau_2$ , where increasing values of this parameter result in downward displacements of the U-shaped Hopf branch.

Taken together, these results show that high transcription and translation delays and intermediate feedback strengths account for periodic solutions in a deterministic model of the gene circuit.

### A stochastic Hopf bifurcation is revealed

We carried out thorough sets of stochastic simulations of the gene circuit by means of the DSSA (21), using the bifurcation diagram in Fig. 2 as a guide for exploring parameter values. A fixed value of  $\tau_2 = 100$  s for the translation delay was used for all stochastic simulations. This value is well centered within the biological range (Table S3) and its corresponding Hopf branch does not intersect the  $\tau_1 = 0$  s axis, allowing examination of the oscillatory regime at intermediate feedback strengths (Fig. 2). We then selected pairs of values  $\alpha$  and  $\tau_1$  uniformly distributed over the parameter space. For each pair, we carried out 100 simulations to estimate the corresponding PDF (see Methods and Figs. S4–S10). Single representative samples for each pair ( $\alpha$ ,  $\tau_1$ ) are shown in Figs. S4–S10. The trajectories portray the time evolution of DNA, mRNA, protein, dimer, and the DNA/dimer repression complex, from where the following qualitative observations can be made:

1. Low  $\alpha$  and low  $\tau_1$ : mRNA, protein and dimer trajectories are too noisy to clearly distinguish an oscillatory pattern. However, a clear periodic pattern emerges and stabilizes as  $\tau_1$  increases.
2. Intermediate  $\alpha$  and low  $\tau_1$ : mRNA, protein and dimer trajectories are spiky and irregular. Once again, a periodic pattern emerges and stabilizes as  $\tau_1$  increases.
3. High  $\alpha$  and low  $\tau_1$ : mRNA, protein and dimer trajectories are not only spiky but also very sparsely distributed. We refer to these high-level, brief, sudden increments in molecule numbers as expression bursts. In high feedback scenarios, expression bursts increase their lifetime and resemble an oscillation peak with increasing values of  $\tau_1$ .
4. The higher the feedback strength  $\alpha$ , the more the mRNA, protein, and dimer oscillation troughs shift closer to zero expression, and the more the oscillation crests become sparsely and irregularly distributed in time. Moreover, the amplitude and period of oscillations seem to increase with  $\alpha$  and  $\tau_1$ .
5. From the DNA and repression complex dynamics, one can see that the frequency at which the gene is available to transcribe diminishes alongside increasing values of  $\alpha$ . Indeed, this follows from the definition of  $\alpha$ , and governs how the oscillation crests are distributed in time. Interestingly, as  $\tau_1$  increases, the time the gene remains free for transcription also increases. This effect becomes more critical for the overall dynamics at high feedback strengths.
6. For all feedback strengths and all transcription delay values, the time-course evolution of mRNA, protein, and dimer are correlated. This is one significant difference to models that do not consider transcriptional and translational delays explicitly (45,46).



In contrast to the deterministic scenario, where a clear-cut transition from the monostable to the oscillatory regime can be identified, sharp transitions are not obvious in the stochastic setting. Moreover, whereas the Hopf bifurcation in the deterministic framework is well defined (in terms of the loss of stability of a steady-state and simultaneous emergence of a limit-cycle (31,33,47)), the stochastic Hopf bifurcation is not.

However, we can intuitively think of a system that fluctuates close to a stable steady-state and, upon certain parameter variations, decreases its residence time close to that state to instead visit other nearby states. Such a gradual transition seems to contradict the classic deterministic concept of bifurcation, but a stochastic system may well exhibit a superposition of steady-state and limit-cycle solutions close to the putative bifurcation point. Moreover, in discrete stochastic dynamics, states are described by probabilities with no hard definition of an unstable steady-state.

To assess whether transitions from low-amplitude to high-amplitude fluctuations are actually portraying the emergence of an oscillatory pattern, one needs to carefully look at the PDFs. We expect a stochastic transition from monostability to oscillations to be reflected in the PDFs. Namely, through a tendency to change from unimodal to bimodal (32,33,48). Even though a strict mathematical formalism for stochastic Hopf bifurcations is still in development (32,49), some systems have already been described using this approach (e.g., pupil light reflex (33), predator-prey models (32), and neural circuit excitable systems (50)). Thus, we recognize these transitions as stochastic

Hopf bifurcations when the PDFs in Figs. S4–S10 change from being unimodal to bimodal. Due to the difficulty of discerning the latter from large sets of data, we summarized our findings as contour plots of the PDFs in two ways. First, as a function of  $\tau_1$  with different values of  $\alpha$ . Second, as a function of  $\alpha$  with different values of  $\tau_1$ . Results are shown as stacked contoured PDFs in Fig. 3. For the sake of simplicity, we only show mRNA and protein PDFs. The dimer PDFs can be found in Figs. S4–S10.

In Fig. 3, the successive stacking of contours from bottom to top (either by increasing  $\alpha$  or  $\tau_1$  values) reveals some interesting changes in the system's dynamics. For instance, in Fig. 3, A and B, contour PDFs at the bottom (low  $\alpha$ -slices) are clearly unimodal and centered at low values of mRNA and protein. This unimodal distribution slightly widens for higher transcriptional delay values. However, for higher values of the feedback strength (upper  $\alpha$ -slices), the contour PDFs dramatically widen, although at the same time the former local peak narrows and is displaced to lower molecule numbers. The tendency of each slice's distribution to become wider at high values of  $\tau_1$  is maintained for all  $\alpha$  levels. Moreover, a second local peak appears for medium to high values of the transcriptional delay  $\tau_1$ . This second peak displaces to higher molecule numbers as  $\alpha$  and  $\tau_1$  increases, hinting at the oscillation amplitude increments already observed in Figs. S4–S10.

On the other hand, from Fig. 3, C and D, and Figs. S4–S10, we observe the PDFs exhibit a tendency to flatten, widen, and become bimodal for higher values of the transcription delay (upper  $\tau_1$ -slices). In agreement with the

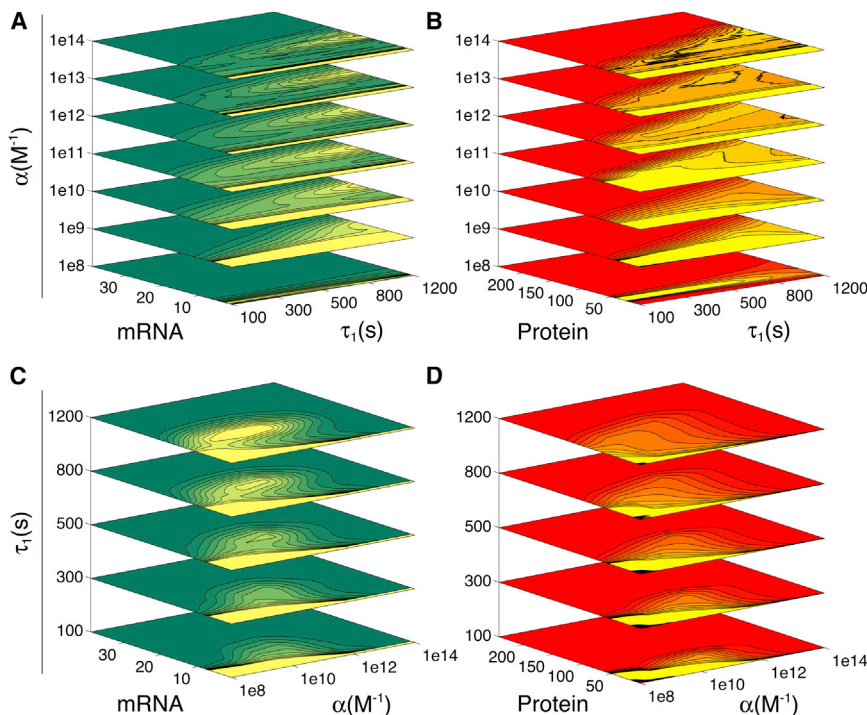

FIGURE 3 Stacked contoured PDFs reveal a stochastic Hopf bifurcation. Contour slices were calculated for different feedback strengths (A, B), and different transcription delay values (C, D). Stacks for mRNA (A, C) and protein (B, D) are shown. Lighter colors correspond to local maxima in the PDFs. From bottom to top, within each panel, contoured PDFs approach a bimodal shape. The uppermost contours in the top panels (A, B) look less smooth as the burst regime appears beyond  $\alpha = 10^{12} \text{ M}^{-1}$ .

top panels (Fig. 3, A and B), they also show how the once unique local peak shrinks and displaces to lower molecule numbers alongside increasing values of  $\alpha$ . In contrast to Fig. 3, A and B, the contoured PDFs in Fig. 3, C and D, are bounded. That is, intermediate levels of the feedback strength  $\alpha$  concentrate the widest (and bimodal) distributions, whereas the bimodality becomes suddenly extinct at feedback strengths higher than  $\alpha = 10^{12} \text{ M}^{-1}$ . This is a very interesting observation when we compare the panels in Fig. 3, C and D, with the two-parameter bifurcation diagram in Fig. 2. It points to a better agreement between deterministic and stochastic predictions at intermediate feedback strengths and high transcription delay (*shaded area* in Fig. 2).

Overall, the data point to the existence of a stochastic Hopf bifurcation underlying the emergence of oscillations in the gene circuit.

### Hopf bifurcation shifting

In the past, bifurcation theory has been extensively used to study gene expression dynamics in connection to network architectures (1,51,52). Nevertheless, with some exceptions (17), it has been largely ignored when stochastic models are employed. One notable exception is the work in (28), where a two-parameter bifurcation diagram exhibiting a Hopf bifurcation was shown for a gene system with negative feedback. The authors subsequently used this bifurcation diagram to compare against stochastic predictions made via a DSSA and, interestingly, found a shift in the bifurcation point when stochastic fluctuations come into play. However, the parameter exploration in (28) is too scarce to assess the influence of feedback and delays within the stochastic bifurcation. Moreover, the generalized SSA they used for simulating stochastic delayed reactions is not exact (43,53).

In this work, we use a different DSSA implementation (21) guaranteeing exact realizations of the DCME, and confirm a shift (postponement) in the stochastic Hopf bifurcation. This is judged by the emergence of bimodal PDFs in Fig. 3 for high  $\tau_1$  values and for bounded  $\alpha$  intervals. When compared with the clear-cut Hopf branch boundary ( $\tau_2 = 100 \text{ s}$ ) in the deterministic scenario, one can readily notice that the contoured PDFs from Fig. 3 reveal more than just a fuzzy transition. They also show that the  $(\tau_2, \alpha)$  parametric domain that sustains stochastic oscillations is smaller than that of its deterministic counterpart. Taking the  $(\tau_2, \alpha)$  values where bimodal PDFs are clearly noticeable (Fig. 3), we estimate that the leftmost boundary of the oscillatory regime shifts to higher  $\alpha$  by approximately one order of magnitude (*shaded area* in Fig. 2). This implies that the overlapping domain where both the deterministic and stochastic approaches effectively predict oscillations is significantly reduced. Because the stochastic modeling framework is based on assumptions that better account for biological reality, we interpret from the Hopf bifurcation

shift that the deterministic approach is systematically misestimating the parametric conditions where periodic gene expression is observable.

### The stochastic oscillatory pattern is stabilized from low to intermediate feedback $\alpha$ and high transcriptional delay $\tau_1$

To further understand the behavior of the oscillatory regime, we calculated amplitude distributions for each batch of 100 trajectories at different  $\alpha$  and  $\tau_1$  values (Fig. S11). For low feedback strength, these distributions show that amplitude increases with the transcription delay already starting from very low molecule numbers. However, for intermediate to high feedback strength, the rise in amplitude as  $\tau_1$  increases is not as large as for low  $\alpha$ . Interestingly, the amplitude distributions become narrower, showing reduced fluctuations in response to increments in the transcription delay. These observations are summarized in Fig. 4, A–C, where the mean amplitudes for mRNA, protein, and dimer, are shown as functions of  $\tau_1$  and  $\alpha$ . There, we can see a steady growth in amplitude as the feedback strength and transcription delays increase. For the case of mRNA, this growth dramatically slows down from medium to high values of  $\alpha$ , and for all values of  $\tau_1$ . On the other hand, dimer amplitude distributions always exhibit a maximum at very low molecule numbers and gradually vanish at higher molecule numbers (Fig. S11). This effectively means that, in contrast to mRNA and protein, dimer oscillations do not have any preferential amplitude. Nonetheless, all amplitude distributions for the three aforementioned molecular species are displaced to higher molecule numbers when  $\tau_1$  and  $\alpha$  values increase (Fig. 4, A–C).

To estimate oscillation periods, frequency spectra were calculated for each trajectory by means of a fast Fourier transform algorithm and its inverse (period curve) averaged for each batch of 100 trajectories (see Supporting Text and Fig. S12). In Fig. 4, D–F, the period distributions for mRNA, protein, and dimer are shown as functions of  $\tau_1$  and  $\alpha$ . There, we can see a steep and steady increment in period as the feedback strength and transcription delay increases. Notably, the very irregular and sparse distribution of peaks in time course trajectories beyond  $\alpha = 10^{12} \text{ M}^{-1}$  precluded a correct period estimation, suggesting that this feedback strength value actually marks the frontier between stochastic oscillations and bursty dynamics.

Finally, we wanted to assess the impact of the negative feedback and transcriptional delay in stabilizing stochastic oscillations. We used a time autocorrelation function  $C(\omega)$  that measures the correlation of a discrete time series with itself as a function of time shift  $\omega$ . Although deterministic oscillations have periodic autocorrelations, stochastic time series do not, due to phase memory loss. Typically, stochastic oscillations have autocorrelations that also oscillate, but the envelope of which decreases exponentially. The half-life

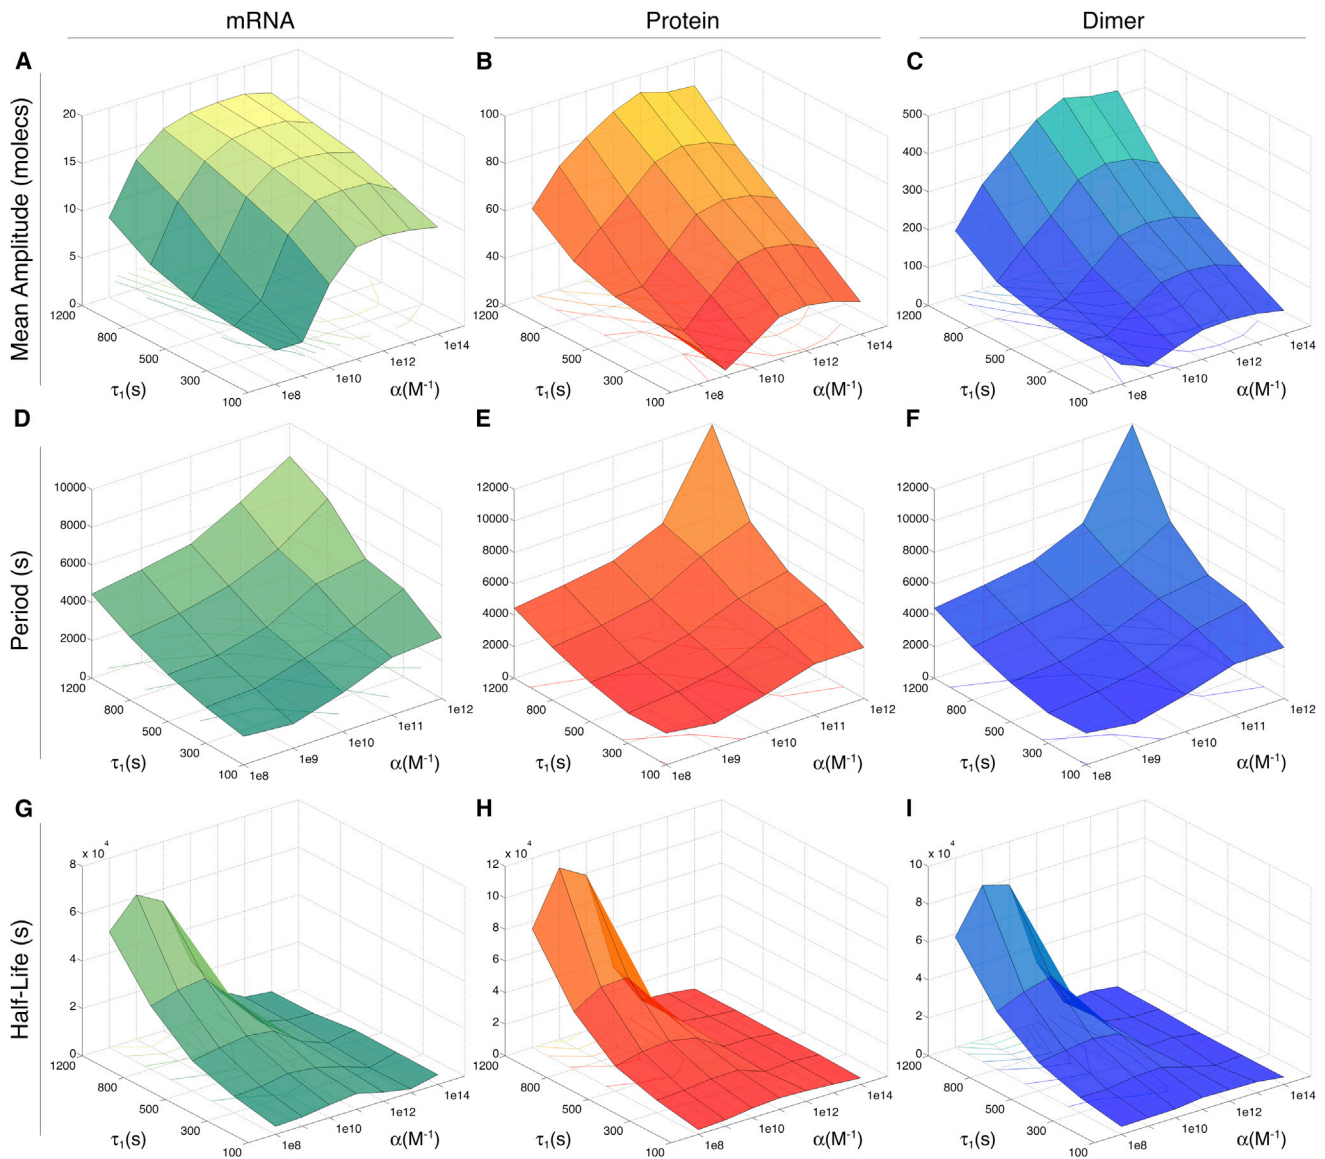

FIGURE 4 Characterization of stochastic oscillations. From top to bottom: amplitude (A, B, C), period (D, E, F), and autocorrelation half-lives (G, H, I). From left to right: mRNA (A, D, G), protein (B, E, D), and dimer (C, F, I). Period values beyond  $\alpha = 10^{12} \text{ M}^{-1}$  diverge in the burst regime.

time of the envelope measures the damping rate of  $C(\omega)$ , and accounts for the impact of noise in the time series.

We calculated time autocorrelation functions for each of the stochastic trajectories and averaged them over each batch of 100 simulations. The damping rate of the averaged functions for each  $(\tau_1, \alpha)$  pair of values illustrate the phase memory loss (Figs. S13–S19). Half-lives were then obtained from a fitted exponential envelope to the averaged autocorrelation functions. We then used them as indicators of how oscillations are resilient to noise fluctuations when varying the feedback strength and transcriptional delay. The result is shown in Fig. 4, G–I, where autocorrelation function half-lives for mRNA, protein, and dimer, are plotted as functions of  $\tau_1$  and  $\alpha$ . There, we can see that at low feedback strength, phase memory is better preserved at higher

transcriptional delay values. More specifically, there is an optimal interval defined by  $\alpha \in [10^9, 10^{10}] \text{ M}^{-1}$ . This suggests that neither high nor very low feedback strength make gene periodic expression more reliable for the control of downstream processes, but instead there exists an optimal tuning range for  $\alpha$ .

In other words, stochastic oscillations are stabilized against random fluctuations for a narrow range of feedback strength. In the context of noise modulation in gene circuits, this result adds to previous counterintuitive stochastic behaviors observed when tuning the negative feedback strength (7). In contrast, phase memory decay rate increases from intermediate to high levels of  $\alpha$ , and for all values of  $\tau_1$ . As was the case with the period distributions (Fig. 4, D–F), this is due to the sparseness and irregularity of expression



peaks in time-course trajectories. We argue that this rapid phase memory loss is another indicator that the stochastic oscillatory regime effectively disappears at high feedback strengths, giving rise to a bursty expression domain.

### Bursts as precursors to oscillations at high feedback strength

The stacked contour PDFs in Fig. 3, C and D, provide another interesting observation. The PDFs gradually widen as the feedback strength increases (indicating the onset of oscillations), yet they shrink abruptly beyond  $\alpha = 10^{12} \text{ M}^{-1}$ . In other words, according to the stochastic model, the probability of observing nonbasal gene expression suddenly becomes negligible for  $\alpha > 10^{12} \text{ M}^{-1}$ . This effectively marks the boundary for the oscillatory regime at high  $\alpha$ . Nonetheless, stochastic simulations show sudden short-lasting bursts beyond  $\alpha = 10^{12} \text{ M}^{-1}$  (Figs. S9 and S10 and shaded area in Fig. 2).

The precise mechanism by which the system shifts between bursts and oscillations is unknown and requires further investigation. However, a plausible explanation can be formulated by observing the sample trajectories in Figs. S4–S10 and comparing how transcriptional delays affect DNA-repressor complex dynamics at high versus low feedback levels. Even though such trajectories only show 1 out of 100 simulations for each  $(\tau_1, \alpha)$  pair, they evidence how the state of the mRNA, protein, and dimer are affected by how often the unbinding events occur (opening the gene for transcription each time) and by the elapsed time the gene remains free of the repressor.

As it turns out, the frequency with which the gene is open for transcription is inversely proportional to the feedback strength  $\alpha$ . In contrast, the time it remains open correlates with the duration of the transcriptional delay  $\tau_1$ . Of importance, the latter effect is more noticeable for large  $\alpha$  (Figs. S8–S10). Thus, it follows naturally that a bursty pattern emerges whenever the gene sporadically frees from the repressor and remains open long enough for transcription events to trigger the burst. This condition is readily met at high  $\alpha$ , where the moment a burst occurs is unpredictable but its size correlates with the elapsed time the gene remained free from the repressor. Conversely, at low  $\alpha$ , the elapsed time the gene remains unrepressed varies greatly and with no apparent correlation to  $\tau_1$ . In this scenario, a high frequency of DNA-repressor binding/unbinding is the chief mechanism governing the occurrence of transcription events. They occur at such a high frequency that a regular oscillatory pattern emerges and is driven by reaction delays. However, at intermediate values of  $\alpha$ , the frequency at which the gene is found open for transcription is neither too low nor too high. In this scenario, the gene remains open long enough to beget a few transcription events but, after it's repressed, it will not be long before it opens again and resumes transcription. This intermediate feedback strength

adds enough regularity in the DNA-repressor binding/unbinding dynamics for a clear oscillatory pattern to emerge. We argue that this is the mechanism behind bursts triggering self-sustained stochastic oscillations in our gene system.

Overall, transcriptional and translational delays control the regularity at which the oscillation crests and troughs are observed, whereas the feedback strength  $\alpha$  is the driving force behind transitions from bursty to oscillatory gene expression profiles.

### Multimodality in the nondelayed and delayed scenario

Multimodal gene expression has been reported in nondelayed negative feedback regulation scenarios (7,10,18). There, multimodality could be easily achieved by tuning the feedback strength and mRNA degradation rate simultaneously. Following this idea, we tuned these parameters together with  $k_d^+$  and  $k_d^-$  rates, and concluded that parameters in (7) required only minor variations. The resulting parameter set is shown in Table S2.

We first explored the nondelayed scenario by fixing  $\tau_1 = \tau_2 = 0 \text{ s}$  in the gene circuit in Fig. 1. To remain consistent with our previous analysis, we explored the effects of delays by increasing  $\tau_1$ . We fixed the translation delay at  $\tau_2 = 100 \text{ s}$  to simplify the analysis of multimodality, because this value is well centered within the biological plausible range (Table S3). As before, we carried out 100 realizations of the DSSA for each parameter combination, and used them to estimate stationary PDFs. Of importance, we calculated PDFs after different simulation times and verified that their shape and statistic measures (such as mode locations, number, and frequencies) remained invariant after 80% of the simulation time reported in here. In other words, the PDFs remain invariant and thus reliably describe the stochastic scenario. In Fig. 5, sample time-course trajectories of mRNA and protein dynamics are shown together with their corresponding protein PDFs. There, it can be observed that each transcription event occurs at a random time and yields an initial amount of mRNA, which is also random. The transcript is then translated to a number of proteins proportional to available mRNA at the time, following a multimodal distribution (see the PDFs in Fig. 5). Interestingly, protein numbers exclusively show small fluctuations around some central values, which we will refer to as modes. We identify these modes in the PDFs, appearing as local maxima, resembling multiple overlapping Gaussian distributions. Moreover, at low  $\tau_1$ , the system transitions between modes occur rapidly and discretely. On the other hand, at high  $\tau_1$ , each transcription-translation event drives the system to a very high mode, which gradually decays to lower modes in a discrete fashion. In any case, discrete jumps do not necessarily occur between consecutive modes.

The PDFs in Fig. 5 account for the time the system spends in a certain state, reflecting the probability of observing each



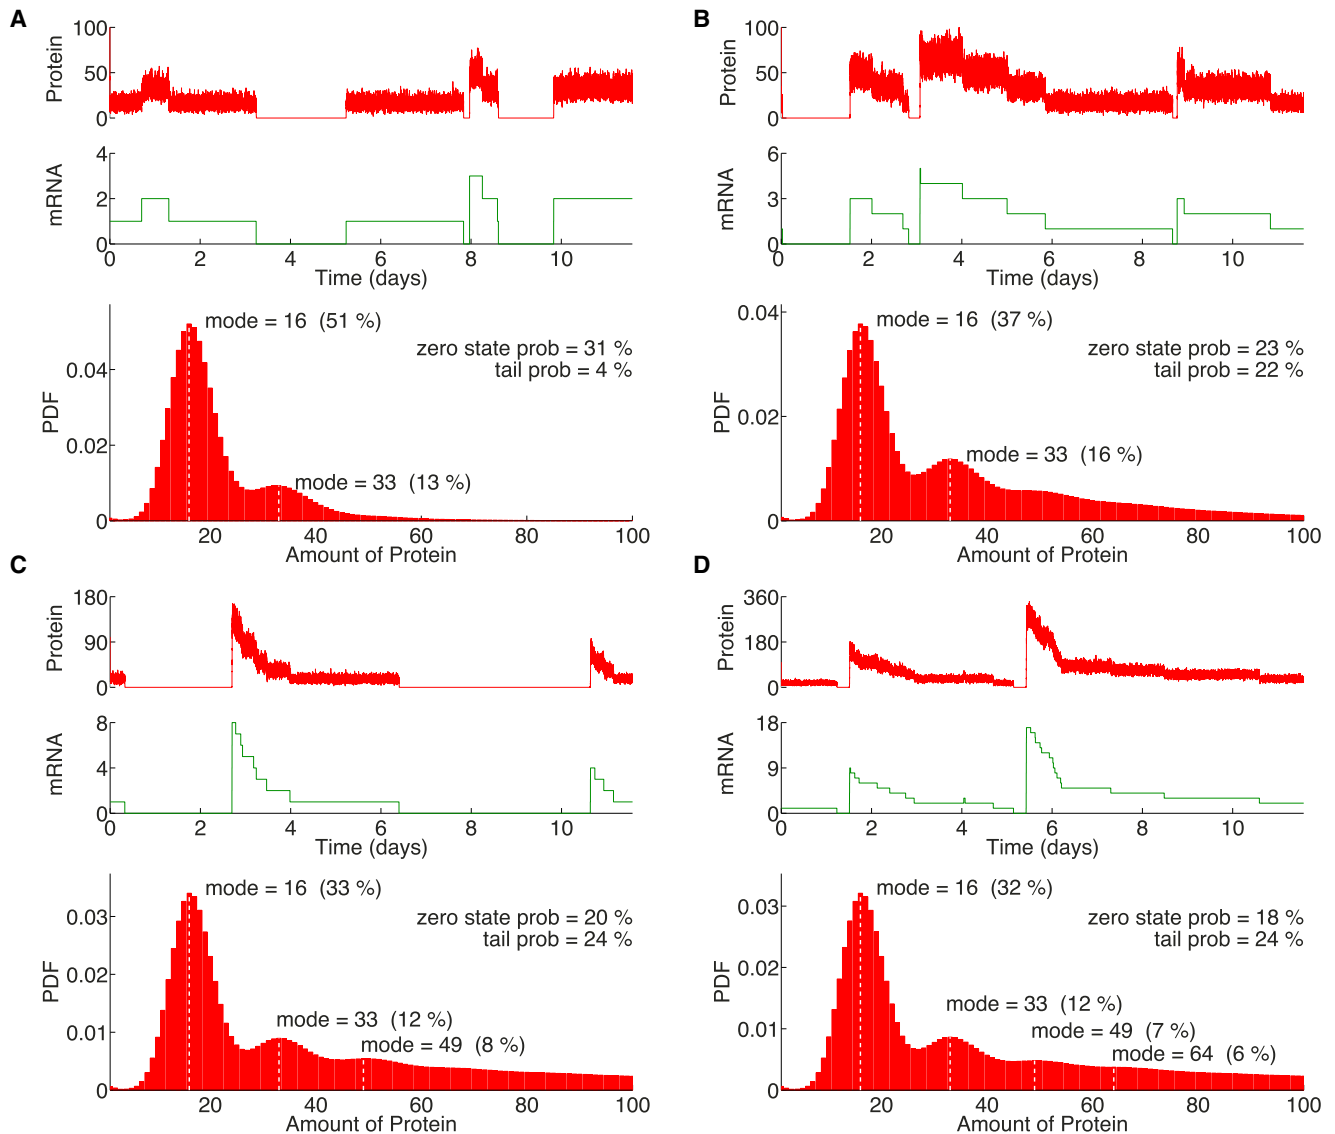

FIGURE 5 Reaction delays enhance multimodal behavior. Protein and mRNA stochastic trajectories and the corresponding protein stationary PDF are shown for (A)  $\tau_1 = 0$  s,  $\tau_2 = 0$  s; (B)  $\tau_1 = 100$  s,  $\tau_2 = 100$  s; (C)  $\tau_1 = 300$  s,  $\tau_2 = 100$  s, and (D)  $\tau_1 = 500$  s,  $\tau_2 = 100$  s. The frequency probability of each mode and its position is indicated. Null expression was excluded from PDF calculations.

gene expression mode. There, it can be observed that the lowest mode (located at 16 proteins) has the highest probability, and that higher modes are located near integer multiples of such lowest mode, which in turn are observed with decreasing probabilities (see for instance the modes at 33, 49, and 64 proteins). Thus, for all delay values, the modes in the multimodal regime are quantized. Moreover, the number of accessible modes increases with the transcription delay  $\tau_1$ , albeit always following the quantization rule.

Multimodal regimes reveal an additional interesting effect after introducing delays. Not only does the number of distinguishable modes grow with higher  $\tau_1$  values, but also larger excursions of the system are observed after each transcription-translation event. They are characterized by a sudden increase in mRNA and protein numbers, which

then gradually decay, visiting lower modes in the process until settling down at zero molecules. During these large excursions, higher modes have shorter residence times, suggesting that lower modes are more stable. Furthermore, the amplitude of these large excursions increases with  $\tau_1$ . This in turn affects the elapsed time of each excursion as, with higher amplitudes, the system has to visit a greater number of modes before settling in the lowest. Our observations from 100 trajectories point at large excursions exhibiting a refractory phase, in which the system almost never jumps again to a higher mode until it has completely exited from the excursion. In the protein PDFs, excursions of the system are reflected by the appearance of tail distributions: the higher the transcription delay, the wider the tail of the PDF. This follows from the amplitude of the excursion

and hence the number of modes visited by the system during the recovery phase. In particular, for the nondelayed system, large excursions were never observed and the width of the PDF tail distribution was negligible (Fig. 5 A). This supports the observation that large excursions are induced by delays.

Taken together, the data suggest that the introduction of delays in the multimodal regime drives the system to an excitable-like behavior. Whether a noisy excitable gene system (35) can originate from coupled delayed reactions remains an open question. Some theoretical studies on excitable neural systems (24,54), stem cell fate decision control (55), and even nonphysiological systems (56) have made some progress in that direction. As was the case when comparing deterministic and stochastic predictions, we observe that multimodality predictions change significantly once explicit delays are accounted for. In particular, the number of modes accessible by the system increases and distinct, transient dynamics emerge.

## CONCLUSIONS

In this study, we have shown how the modeling of a simple gene circuit with negative feedback at the single-cell level demands a proper handling of reaction delays. In particular, it was demonstrated that the interplay between feedback strength and transcriptional-translational delays shape the dynamical landscape of the system. This landscape was chiefly dominated by the coexistence of two dynamical regimes, monostability and oscillations, which constitute nonoverlapping expression profiles of the gene. Even though both deterministic and stochastic modeling predicts the emergence of oscillations through a Hopf bifurcation, deterministic models mask important dynamical effects. Examples of the latter are discrete stochastic effects, such as bursty expression and multimodality, which we also analyzed in terms of negative feedback strength and delays.

Additional differences between the deterministic and the stochastic models were pointed out. Among them, we found that the buffering of fluctuations varies within the parametric region where stochastic oscillations are predicted. Specifically, there is a small range of negative feedback strength and transcription delays where the impact of fluctuations is diminished and the oscillatory pattern becomes more regular. The parametric boundaries that delimit the oscillatory regime were also different for deterministic and stochastic models. Notably, a shift in the stochastic Hopf bifurcation with respect to its deterministic counterpart was observed. The occurrence of bimodality in the PDFs as a means to report a shift in the Hopf bifurcation is a very stringent criteria. Nonetheless, it safely prevents from false-positive identification of oscillations from mere fluctuations.

Our work also highlights the need for a better understanding of bifurcations in the context of stochastic systems; in

particular, when transitions between different dynamical ranges are sensitive to stochastic discrete effects. As the burgeoning field of synthetic biology demands robust control of expression dynamics, we emphasize that choosing a precise and reliable modeling framework is crucial for engineering gene circuits. Important information can be learned from studying bifurcation shifts as well as inspecting the amplitude, period, and phase memory decay inherent to stochastic oscillations.

Of importance, it was shown that the onset of stochastic oscillations from a bursty expression regime depends on a fine balance between the frequency of DNA-repressor binding events and their duration. These properties are in turn modulated by feedback strength and delays, further stressing their importance within the stochastic modeling approach. We are aware that we have not considered a delay between repressor unbinding and transcription initiation. It would be interesting to explore how a delay accounting for processes such as RNA polymerase binding, transcription factor recruitment and chromatin remodeling, affect the dynamics of the gene circuit in Fig. 1.

We also showed how transcription, translation, and dimerization can generate multimodality. The latter was achieved by considering different parameter values while keeping the negative feedback circuit architecture in Fig. 1 identical. We demonstrated that introducing reaction delays not only preserves multimodal behavior, but also, that the number of modes accessible for the system increases alongside the transcriptional delay. Moreover, delays induce a significant change in the transient dynamical behavior of the gene, reminiscent of noisy excitable systems. Accounting for delays on multimodality is of major importance for understanding how genes exert control of downstream effectors. For instance, phenotype heterogeneity is often explained as multiple expression profiles resulting from identical genotypes. Multimodality in turn, is a dynamical emergent property that could readily account for this heterogeneity. In the context of synthetic biology, a deeper understanding into effective construction of tunable gene circuits capable of switching between different expression regimes is highly valuable.

In summary, we have provided deeper insight into the mathematical subtleties that should be considered for proper design of single genes in single cells with oscillatory, multimodal, and bursty expression profiles. Accounting for delays, for instance, allowed us to identify a stochastic Hopf bifurcation and find a gene circuit behaving as a noisy excitable system. This is, to our knowledge, the first time a delay-induced stochastic Hopf bifurcation (and a shift with respect to its deterministic counterpart) is reported for a GRN. Although a thorough analysis of a noisy excitable gene system with delays is beyond the scope of this work, we believe this is the first time such behavior is reported for a GRN with delays.

## SUPPORTING MATERIAL

Twenty-three figures, three tables, two models, and supporting text are available at [http://www.biophysj.org/biophysj/supplemental/S0006-3495\(13\)05799-8](http://www.biophysj.org/biophysj/supplemental/S0006-3495(13)05799-8).

The authors thank Zach Hensel for helpful discussions and comments on the manuscript and André Leier for helpful discussions and assistance with the computational setup in the OIST HPC cluster facility.

## REFERENCES

- Novák, B., and J. J. Tyson. 2008. Design principles of biochemical oscillators. *Nat. Rev. Mol. Cell Biol.* 9:981–991.
- Purcell, O., N. J. Savery, ..., M. di Bernardo. 2010. A comparative analysis of synthetic genetic oscillators. *J. R. Soc. Interface.* 7:1503–1524.
- Thattai, M., and A. van Oudenaarden. 2001. Intrinsic noise in gene regulatory networks. *Proc. Natl. Acad. Sci. USA.* 98:8614–8619.
- Dublanche, Y., K. Michalodimitrakis, ..., L. Serrano. 2006. Noise in transcription negative feedback loops: simulation and experimental analysis. *Mol. Syst. Biol.* 2:41.
- Hooshangi, S., and R. Weiss. 2006. The effect of negative feedback on noise propagation in transcriptional gene networks. *Chaos.* 16:026108–026110.
- Stekel, D. J., and D. J. Jenkins. 2008. Strong negative self regulation of prokaryotic transcription factors increases the intrinsic noise of protein expression. *BMC Syst. Biol.* 2:6.
- Marquez-Lago, T. T., and J. Stelling. 2010. Counter-intuitive stochastic behavior of simple gene circuits with negative feedback. *Biophys. J.* 98:1742–1750.
- Kaern, M., T. C. Elston, ..., J. J. Collins. 2005. Stochasticity in gene expression: from theories to phenotypes. *Nat. Rev. Genet.* 6:451–464.
- Becskei, A., and L. Serrano. 2000. Engineering stability in gene networks by autoregulation. *Nature.* 405:590–593.
- Iyer-Biswas, S., F. Hayot, and C. Jayaprakash. 2009. Stochasticity of gene products from transcriptional pulsing. *Phys. Rev. E Stat. Nonlin. Soft Matter Phys.* 79:031911.
- Golding, I., J. Paulsson, ..., E. C. Cox. 2005. Real-time kinetics of gene activity in individual bacteria. *Cell.* 123:1025–1036.
- Yu, J., J. Xiao, ..., X. S. Xie. 2006. Probing gene expression in live cells, one protein molecule at a time. *Science.* 311:1600–1603.
- Wang, Z., Z. Hou, and H. Xin. 2005. Internal noise stochastic resonance of synthetic gene network. *Chem. Phys. Lett.* 401:307–311.
- Hou, Z., and H. Xin. 2003. Internal noise stochastic resonance in a circadian clock system. *J. Chem. Phys.* 119:11508–11512.
- Paulsson, J., O. G. Berg, and M. Ehrenberg. 2000. Stochastic focusing: fluctuation-enhanced sensitivity of intracellular regulation. *Proc. Natl. Acad. Sci. USA.* 97:7148–7153.
- Tigges, M., T. T. Marquez-Lago, ..., M. Fussenegger. 2009. A tunable synthetic mammalian oscillator. *Nature.* 457:309–312.
- Scott, M., T. Hwa, and B. Ingalls. 2007. Deterministic characterization of stochastic genetic circuits. *Proc. Natl. Acad. Sci. USA.* 104:7402–7407.
- Shahrezaei, V., and P. S. Swain. 2008. Analytical distributions for stochastic gene expression. *Proc. Natl. Acad. Sci. USA.* 105:17256–17261.
- Simpson, M. L., C. D. Cox, and G. S. Sayler. 2003. Frequency domain analysis of noise in autoregulated gene circuits. *Proc. Natl. Acad. Sci. USA.* 100:4551–4556.
- Cox, C. D., J. M. McCollum, ..., M. L. Simpson. 2006. Frequency domain analysis of noise in simple gene circuits. *Chaos.* 16:026102.
- Barrio, M., K. Burrage, ..., T. Tian. 2006. Oscillatory regulation of Hes1: discrete stochastic delay modelling and simulation. *PLOS Comput. Biol.* 2:e117.
- Monk, N. A. M. 2003. Oscillatory expression of Hes1, p53, and NF-kappaB driven by transcriptional time delays. *Curr. Biol.* 13:1409–1413.
- Mather, W., M. R. Bennett, ..., L. S. Tsimring. 2009. Delay-induced degrade-and-fire oscillations in small genetic circuits. *Phys. Rev. Lett.* 102:068105.
- Sethia, G. C., and A. Sen. 2006. Excitable dynamics in the presence of time delay. *Phys. Lett. A.* 359:285–289.
- Rateitschak, K., and O. Wolkenhauer. 2007. Intracellular delay limits cyclic changes in gene expression. *Math. Biosci.* 205:163–179.
- Barrio, M., A. Leier, and T. T. Marquez-Lago. 2013. Reduction of chemical reaction networks through delay distributions. *J. Chem. Phys.* 138:104114.
- Glass, L., A. Beuter, and D. Larocque. 1988. Time delays, oscillations, and chaos in physiological control systems. *Math. Biosci.* 90:111–125.
- Bratsun, D., D. Volfson, ..., J. Hasty. 2005. Delay-induced stochastic oscillations in gene regulation. *Proc. Natl. Acad. Sci. USA.* 102:14593–14598.
- Kepler, T. B., and T. C. Elston. 2001. Stochasticity in transcriptional regulation: origins, consequences, and mathematical representations. *Biophys. J.* 81:3116–3136.
- Schultz, D., A. M. Walczak, ..., P. G. Wolynes. 2008. Extinction and resurrection in gene networks. *Proc. Natl. Acad. Sci. USA.* 105:19165–19170.
- Kuznetsov, I. U. A. 1998. Elements of Applied Bifurcation Theory. Springer.
- Zou, X., K. E. Wang, and D. Fan. 2013. Stochastic Poincaré–Bendixson theorem and its application on stochastic Hopf bifurcation. *Int. J. Bifurcat. Chaos.* 23:1350070.
- Beuter, A. 2003. Nonlinear Dynamics in Physiology and Medicine. Springer.
- Fronzoni, L., R. Mannella, ..., F. Moss. 1987. Postponement of Hopf bifurcations by multiplicative colored noise. *Phys. Rev. A.* 36:834–841.
- Rué, P., and J. Garcia-Ojalvo. 2011. Gene circuit designs for noisy excitable dynamics. *Math. Biosci.* 231:90–97.
- Kubitschek, H. E., and J. A. Friske. 1986. Determination of bacterial cell volume with the Coulter Counter. *J. Bacteriol.* 168:1466–1467.
- Tyson, C. B., P. G. Lord, and A. E. Wheals. 1979. Dependency of size of *Saccharomyces cerevisiae* cells on growth rate. *J. Bacteriol.* 138:92–98.
- Engelborghs, K., T. Luzyanina, and D. Roose. 2002. Numerical bifurcation analysis of delay differential equations using DDE-BIFTOOL. *ACM Trans. Math. Softw.* 28:1–21 (TOMS).
- Ermentrout, B. 2002. Simulating, Analyzing, and Animating Dynamical Systems: A Guide to XPPAUT for Researchers and Students. Siam, Philadelphia, PA.
- Tian, T., K. Burrage, ..., M. Carletti. 2007. Stochastic delay differential equations for genetic regulatory networks. *J. Comput. Appl. Math.* 205:696–707.
- Higham, D. J. 2008. Modeling and simulating chemical reactions. *SIAM Rev.* 50:347–368.
- Marquez-Lago, T. T., A. Leier, and K. Burrage. 2010. Probability distributed time delays: integrating spatial effects into temporal models. *BMC Syst. Biol.* 4:19.
- Cai, X. 2007. Exact stochastic simulation of coupled chemical reactions with delays. *J. Chem. Phys.* 126:124108.
- Gillespie, D. T. 1977. Exact stochastic simulation of coupled chemical reactions. *J. Phys. Chem.* 81:2340–2361.
- Polynikis, A., S. J. Hogan, and M. di Bernardo. 2009. Comparing different ODE modelling approaches for gene regulatory networks. *J. Theor. Biol.* 261:511–530.
- Chen, L., and K. Aihara. 2002. A model of periodic oscillation for genetic regulatory systems. Circuits and systems I: fundamental theory and applications. *IEEE T. Circuits-I.* 49:1429–1436.

47. Verdugo, A., and R. Rand. 2008. Hopf bifurcation in a DDE model of gene expression. *Commun. Nonlinear Sci. Numer. Simul.* 13:235–242.
48. Longtin, A. 1991. Noise-induced transitions at a Hopf bifurcation in a first-order delay-differential equation. *Phys. Rev. A.* 44:4801–4813.
49. Gaudreault, M., F. Lépine, and J. Viñals. 2009. Pitchfork and Hopf bifurcation thresholds in stochastic equations with delayed feedback. *Phys. Rev. E Stat. Nonlin. Soft Matter Phys.* 80:061920.
50. Tanabe, S., and K. Pakdaman. 2001. Dynamics of moments of Fitz-Hugh-Nagumo neuronal models and stochastic bifurcations. *Phys. Rev. E Stat. Nonlin. Soft Matter Phys.* 63:031911.
51. Angeli, D., J. E. Ferrell, Jr., and E. D. Sontag. 2004. Detection of multistability, bifurcations, and hysteresis in a large class of biological positive-feedback systems. *Proc. Natl. Acad. Sci. USA.* 101:1822–1827.
52. Tyson, J. J., and B. Novák. 2010. Functional motifs in biochemical reaction networks. *Annu. Rev. Phys. Chem.* 61:219–240.
53. Miękisz, J., J. Poleszczuk, ..., U. Foryś. 2011. Stochastic models of gene expression with delayed degradation. *Bull. Math. Biol.* 73:2231–2247.
54. Pototsky, A., and N. Janson. 2008. Excitable systems with noise and delay, with applications to control: renewal theory approach. *Phys. Rev. E Stat. Nonlin. Soft Matter Phys.* 77:031113.
55. Kalmar, T., C. Lim, ..., A. Martinez Arias. 2009. Regulated fluctuations in nanog expression mediate cell fate decisions in embryonic stem cells. *PLoS Biol.* 7:e1000149.
56. Piwonski, T., J. Houlihan, ..., G. Huyet. 2005. Delay-induced excitability. *Phys. Rev. Lett.* 95:040601.



# Delays Induce Novel Stochastic Effects in Negative Feedback Gene Circuits

Eder Zavala and Tatiana T. Marquez-Lago\*

Integrative Systems Biology Unit, Okinawa Institute of Science and Technology, Okinawa, Japan

\* Correspondence: tatiana.marquez@oist.jp

## SUPPORTING MATERIAL

### Supporting Tables and Models

1. **Biological Ranges for Parameter Values and Sets of Fixed Nominal Values for Oscillatory and Multimodal Regimes (TABLES S1 – S3)**
2. **Continuous Deterministic Model**
3. **Discrete Stochastic Model**

### Supporting Text

1. **About the Hopf Bifurcation**
2. **Period Estimation of Stochastic Oscillations**

### Supporting Figures

FIGURE S1 – The deterministic bifurcation analysis evidences a Hopf bifurcation.

FIGURE S2 – Comparison between deterministic and stochastic sample trajectories.

FIGURE S3 – Delay Stochastic Simulation Algorithm (DSSA) based on the Reaction Rejection Method.

FIGURES S4-S10 – Samples of stochastic realizations and probability density functions for different feedback strengths and transcriptional delay values.

FIGURE S11 – Sample stochastic oscillations and amplitude distributions.

FIGURE S12 – Period estimation from frequency spectra obtained by FFT.

FIGURES S13-S19 – Autocorrelation functions and their half-lives for different feedback strengths and transcriptional delay values.

FIGURES S20-S21 – Sample stochastic oscillations for a simulation volume of 5 fL and 37 fL, respectively.

FIGURES S22-S23 – Sample stochastic trajectories showing multimodality for a simulation volume of 5 fL and 37 fL, respectively.

## Supporting Tables and Models

### 1. Biological Ranges for Parameter Values and Sets of Fixed Nominal Values for Oscillatory and Multimodal Regimes

| Parameter  | Description              | Value            | Units          |
|------------|--------------------------|------------------|----------------|
| $k_1$      | Transcription rate       | 10/60            | $s^{-1}$       |
| $k_2$      | Translation rate         | 10/60            | $s^{-1}$       |
| $k_d^+$    | Dimer association rate   | $5 \cdot 10^7$   | $M^{-1}s^{-1}$ |
| $k_d^-$    | Dimer dissociation rate  | 1                | $s^{-1}$       |
| $k_c^+$    | Dimer-DNA binding rate   | $10^8$           | $M^{-1}s^{-1}$ |
| $k_c^-$    | Dimer-DNA unbinding rate | $k_c^+ / \alpha$ | $s^{-1}$       |
| $\gamma_1$ | mRNA degradation rate    | $10^{-2}$        | $s^{-1}$       |
| $\gamma_2$ | Protein degradation rate | $10^{-2}$        | $s^{-1}$       |

**TABLE S1** Parameter set used for describing the onset of oscillations. For consistency, parameter values are identical to the ones used in a previous work (see Parameter Set 1 in (1)). The only exception is  $\gamma_2$ , which was increased from  $10^{-4}$  to  $10^{-2} s^{-1}$  to observe self-sustained oscillations in the deterministic model.

| Parameter  | Description              | Value            | Tolerance             | Units          |
|------------|--------------------------|------------------|-----------------------|----------------|
| $k_1$      | Transcription rate       | 1/60             | 1/60 – 10/60          | $s^{-1}$       |
| $k_2$      | Translation rate         | 10/60            | 1/60 – 10/60          | $s^{-1}$       |
| $k_d^+$    | Dimer association rate   | $10^7$           | $10^5 - 5 \cdot 10^7$ | $M^{-1}s^{-1}$ |
| $k_d^-$    | Dimer dissociation rate  | $10^2$           | $1 - 10^2$            | $s^{-1}$       |
| $k_c^+$    | Dimer-DNA binding rate   | $10^{10}$        | -                     | $M^{-1}s^{-1}$ |
| $k_c^-$    | Dimer-DNA unbinding rate | $k_c^+ / \alpha$ | -                     | $s^{-1}$       |
| $\alpha$   | Feedback strength        | $10^{15}$        | $10^{13} - 10^{15}$   | $M^{-1}$       |
| $\gamma_1$ | mRNA degradation rate    | $10^{-5}$        | $10^{-4} - 10^{-5}$   | $s^{-1}$       |
| $\gamma_2$ | Protein degradation rate | $10^{-2}$        | -                     | $s^{-1}$       |

**TABLE S2** Parameter set used for describing multimodality. Tolerances describe the range of values where multimodal behavior is still observed. An important exception is  $\gamma_1$ , which drives the system to bursty expression if increased from its nominal value.

| Parameter  | Description              | Range                         | Units          |
|------------|--------------------------|-------------------------------|----------------|
| $k_1$      | Transcription rate       | $10^{-3} - 2 \cdot 10^{-1}$   | $s^{-1}$       |
| $k_2$      | Translation rate         | $10^{-3} - 1$                 | $s^{-1}$       |
| $k_d^+$    | Dimer association rate   | $5 \cdot 10^7 - 3 \cdot 10^8$ | $M^{-1}s^{-1}$ |
| $k_d^-$    | Dimer dissociation rate  | $1 - 10^3$                    | $s^{-1}$       |
| $k_c^+$    | Dimer-DNA binding rate   | $10^8 - 2 \cdot 10^{11}$      | $M^{-1}s^{-1}$ |
| $k_c^-$    | Dimer-DNA unbinding rate | $k_c^+ / \alpha$              | $s^{-1}$       |
| $\alpha$   | Feedback strength        | $10^{-20} - 10^{15}$          | $M^{-1}$       |
| $\gamma_1$ | mRNA degradation rate    | $10^{-4} - 10^{-1}$           | $s^{-1}$       |
| $\gamma_2$ | Protein degradation rate | $2 \cdot 10^{-5} - 10^{-2}$   | $s^{-1}$       |
| $\tau_1$   | Transcription delay      | 0 – 1500                      | s              |
| $\tau_2$   | Translation delay        | 10 – 150                      | s              |

**TABLE S3** Biological ranges of parameter values used in the present study (1, 2).

## 2. Continuous Deterministic Model

### Considerations

- Modeled as a continuous deterministic DDE system with two discrete constant delays.
- No Quasi Steady-State (QSS) assumption was adopted.
- No lumping of transcription-translation processes.
- DNA, mRNA, Protein and Dimer concentrations are considered explicitly.

### Reactions and Model

Starting from the set of reactions Eq. 1 in the main text, let molecular concentrations be denoted by

$$\begin{aligned} g &= [\text{DNA}] & m &= [\text{mRNA}] & d &= [\text{D}] & g_{\text{total}} &= g + g_b = \text{constant} \\ g_b &= [\text{DNA}\cdot\text{D}] & p &= [\text{P}] \end{aligned}$$

The corresponding system of ODEs is

$$\begin{aligned} \dot{g} &= k_c^- g_b - k_c^+ g d \\ \dot{m} &= k_1 g - \gamma_1 m \\ \dot{p} &= k_2 m - \gamma_2 p + k_d^- d - k_d^+ p^2 \\ \dot{d} &= k_c^- g_b - k_c^+ g d + k_d^+ p^2 - k_d^- d \end{aligned} \tag{Eq. S1}$$

where  $k_1$  and  $k_2$  are the transcription and translation rates, respectively. Dimer association/dissociation rates are denoted by  $k_d^+$  and  $k_d^-$ ; a dimer binds and unbinds DNA at rates  $k_c^+$  and  $k_c^-$ ; whereas mRNA and protein turnover are represented by rates  $\gamma_1$  and  $\gamma_2$ , respectively. Replacing the conservation equation and introducing time delays we arrive to the system of DDEs

$$\begin{aligned} \dot{g} &= k_c^+ \left( \frac{g_{\text{total}} - g}{\alpha} - g d \right) & \alpha &= k_c^+ / k_c^- \\ \dot{m} &= k_1 g_{\tau_1} - \gamma_1 m \\ \dot{p} &= k_2 m_{\tau_2} - \gamma_2 p + k_d^- d - k_d^+ p^2 \\ \dot{d} &= k_c^+ \left( \frac{g_{\text{total}} - g}{\alpha} - g d \right) + k_d^+ p^2 - k_d^- d \end{aligned} \tag{Eq. S2}$$

where  $\tau_1$  and  $\tau_2$  are, respectively, the delays of the transcription and translation processes defined as  $x_\tau = x(t - \tau)$ .

### Parameters

To explore how the solutions of the system depend qualitatively on parameter values, that is, a bifurcation analysis, we adopted the set of parameter values in Table S1. All kinetic rate constants except for  $\gamma_2$  take the same value as in the ‘‘Basic Simulation Parameter Set 1’’ described in Table S2 of (1). The parameter  $\gamma_2$  corresponds to the protein degradation rate. In our simulations, this parameter required a two-fold increase to observe deterministic self-sustained oscillations. However, the value used here still lies within biologically feasible ranges (see Table S3 and (1)).

### 3. Discrete Stochastic Model

#### Considerations

- Modeled through an implementation of the Delay Stochastic Simulation Algorithm (DSSA) that reproduces exact trajectories of the Delay Chemical Master Equation (DCME). Transcription and translation delays were treated as constant.
- No Quasi Steady-State (QSS) assumption was adopted.
- No lumping of transcription-translation processes.
- DNA, mRNA, Protein, Dimer and Repression Complex (DNA-Dimer) concentrations are considered explicitly.

#### Reactions and Model

Starting from the set of reactions Eq. 1 in the main text, lets split them into the following set of individual reactions

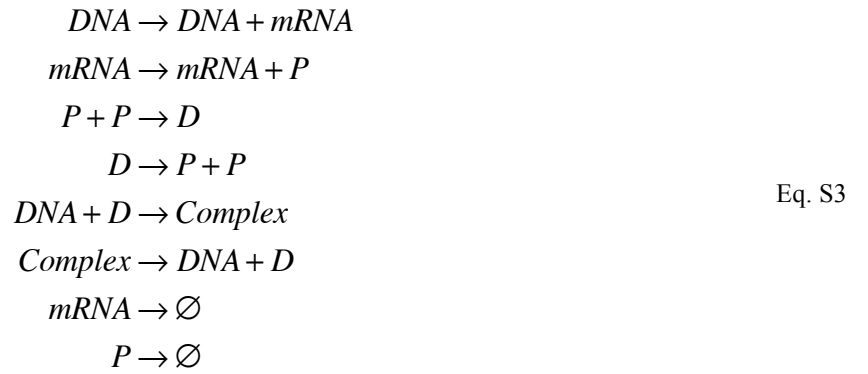

From Eq. S3, we can build an  $m \times n$  matrix corresponding to  $m$  reactions and  $n$  molecular species, each entry denoting the discrete change in the amount of molecular species  $n$  after the  $m$  reaction occurred. This is the stoichiometric matrix  $S$  of the system, which, together with the reaction delays vector  $T$ , is given by

$$S = \begin{pmatrix} 0 & 1 & 0 & 0 & 0 \\ 0 & 0 & 1 & 0 & 0 \\ 0 & 0 & -2 & 1 & 0 \\ 0 & 0 & 2 & -1 & 0 \\ -1 & 0 & 0 & -1 & 1 \\ 1 & 0 & 0 & 1 & -1 \\ 0 & -1 & 0 & 0 & 0 \\ 0 & 0 & -1 & 0 & 0 \end{pmatrix}, \quad T = \begin{pmatrix} \tau_1 \\ \tau_2 \\ 0 \\ 0 \\ 0 \\ 0 \\ 0 \\ 0 \end{pmatrix}.
 \tag{Eq. S4}$$

Following this, the reaction propensities are described in vector  $A$  as



$$A = \begin{pmatrix} k_1 \cdot DNA \\ k_2 \cdot mRNA \\ (k_d^+ / \sigma) \cdot P(P-1)/2 \\ k_d^- \cdot D \\ (k_c^+ / \sigma) \cdot DNA \cdot D \\ (k_c^+ / \alpha) \cdot Complex \\ \gamma_1 \cdot mRNA \\ \gamma_2 \cdot P \end{pmatrix} \quad \text{Eq. S5}$$

where  $k_1$  and  $k_2$  are the transcription and translation rates, respectively. Dimer association/dissociation rates are denoted by  $k_d^+$  and  $k_d^-$ ; a dimer binds and unbinds DNA at rates  $k_c^+$  and  $k_c^-$ ; whereas mRNA and protein turnover are represented by rates  $\gamma_1$  and  $\gamma_2$ , respectively. The parameter  $\sigma$  is the product of Avogadro's number with the volume of one femtoliter, and was used to convert from molarity units.

The stoichiometric matrix  $S$ , together with the propensities  $A$ , the vector  $T$  and a set of initial conditions, are necessary inputs for carrying out realizations of trajectories of the DCME through the DSSA (Fig. S3). All reactions were treated as non-consuming reactions.

### Parameters

The parameters used in the stochastic description are the same as in the deterministic one (Table S1). It was only required to convert from molarity units after considering the size of the system, corresponding to the volume a typical *E. coli* cell (1 fL) (3).

### Scaling-up the Size of the System: From Prokaryotes to Eukaryotes

Some of the parameter values considered here lie within ranges that are also valid for eukaryotes. This is particularly true for the transcriptional delay, spanning values as high as 20 min. We wondered if our stochastic model predictions regarding oscillations and multistability would hold for such systems of larger size.

Thus, we decided to test our model and carried out stochastic simulations using a volume of 5 fL and 37 fL (see parameter  $\sigma$  in Eq. S5). These values correspond, respectively, to the maximum volume for an *E. coli* cell (3) and to the mean volume for a typical *S. cerevisiae* cell (4). All other parameter values were taken from Tables S1 and S2 for oscillations and multimodality, respectively. We carried out stochastic simulations using the same methods and protocols already described in the main text. For testing oscillations, however, we only explored transcriptional delay values in the highest portion of the range ( $\tau_1 = 800$  s and  $\tau_1 = 1200$  s).

Some resulting stochastic trajectories exhibiting oscillations and multimodality are shown in Figs. S20-S21 and Figs. S22-S23, respectively. Thus, though our model predictions may differ in magnitude between prokaryote and eukaryote systems, they're qualitatively equivalent.

# Supporting Text

## 1. About the Hopf Bifurcation

Consider a dynamical system that depends on parameters. In general, we represent such a system as  $\dot{x} = f(x, \alpha)$  or  $x \mapsto f(x, \alpha)$  in the continuous- and discrete-time case, respectively. There,  $x \in \mathbb{R}^n$  and  $\alpha \in \mathbb{R}^m$  stand for the phase variables and parameters, respectively. The state of the system at time  $t$  is thus the collection of values its phase variables take at that time. Depending on how the state changes over time and its response to perturbations, they are referred as stable/unstable equilibrium states (steady-states), periodic orbits, and other more sophisticated classifications. The collection of states that a system exhibits can be represented in a phase portrait of the system. As the parameters vary, the phase portrait also varies. In some cases, the phase portrait remains topologically equivalent, but in others, it can undergo sudden qualitative changes in the system's set of solutions. Following this, the appearance of a topologically nonequivalent phase portrait under variation of parameters is called a bifurcation (5). In other words, the bifurcation is a change in the dynamical regime of the system as its parameters pass through a critical value.

Bifurcation theory deals with describing the qualitative dynamical changes that can be observed in a system as its parameters vary. For example, after varying one or more parameters, the state of the system may change from stable to unstable and/or a periodic solution may arise. The relationship between the network architecture of the system (i.e. the wiring among its variables as judged by the graph representation of the Jacobian matrix), the topology invariance of phase portraits as parameters vary (i.e. the robustness of the system), and the many different types of bifurcations described so far, is an active topic of research.

A Hopf bifurcation, such as the one mentioned in this article, occurs when a steady-state changes its stability at a critical parameter value and low-amplitude oscillations, described by a limit cycle, emerge at the same time. In deterministic systems, this is verified by the presence of a purely imaginary pair of eigenvalues of the Jacobian matrix evaluated at the equilibrium point (5) (Fig. S1, C). If only one parameter is varied in the search of novel qualitative solutions for the system, the bifurcation occurs at a critical point, which is called a *bifurcation point*. If two parameters are varied, the bifurcation occurs at a critical line (a one-dimensional manifold), which here is simply called a *bifurcation branch*. In this article, each Hopf bifurcation branch illustrated in Fig. 2 is a set of  $(\tau_1, \alpha)$  values defining the boundary between a stable steady-state solution and a periodic one. For the special case where  $\tau_1 = \tau_2 = 0$ , the system of DDEs becomes a set of Ordinary Differential Equations (ODEs). We confirmed that its time-course evolution always converged to a stable steady-state solution by numerically solving the ODE system using the parameter set in Table S1 and performing parameter sweeps of the feedback strength within the range  $\alpha \in [10^7, 10^{15}] \text{ M}^{-1}$  (data not shown). The monostable and oscillatory scenarios were both verified by numerical computations of time-course trajectories (Figs. S1 F and S2) as described in the Methods section.

In stochastic systems, however, bifurcation theory is not yet fully developed. Thus, to tell whether a stochastic Hopf bifurcation has occurred one can inspect the stationary Probability Density Functions (PDFs) as its shape changes from unimodal to bimodal. In our system, the basal expression state is located at a low non-zero value (see for instance the unimodal distributions in Fig. S4). When the  $(\tau_1, \alpha)$  values are increased, this state eventually vanishes while oscillations emerge in its place. This is reflected by the corresponding PDFs widening and flattening around the position of the former basal state. The emergent oscillations have its crests reaching higher values as the bifurcation parameters increase, while its troughs reach zero values all the time (molecule numbers are positively defined). As a consequence, a great portion of the PDFs is hoarded by the first, lower mode. Higher transcriptional delays transform the PDFs from a flattened to a bimodal shape, making it clearer that the transition from basal state to the oscillatory has completed (see Figs. S4 to S10 and notice that only the second mode is represented when PDFs become bimodal). Conversely to the deterministic analysis, the definition of a critical stochastic bifurcation point (or branch) doesn't exist. Other arbitrary criteria, such as the one chosen in this work, must be used to judge whether a new stochastic dynamical regime has emerged. We believe our criterion of observing bimodal PDFs is stringent enough to assert stochastic oscillations emerged through a delay-induced stochastic Hopf bifurcation.

## 2. Period Estimation of Stochastic Oscillations

To estimate oscillation periods, frequency spectra were calculated for each trajectory by means of a Fast Fourier Transform (FFT) algorithm and its inverse (period curve) averaged for each batch of 100 trajectories. In each case, the period was calculated as the value of the highest local maximum. It is worth noting we made an exception for  $\alpha = 10^{12} \text{ M}^{-1}$ , where identification of local maxima became problematic (Fig. S12). In that case, we first made a rough estimation of the period by measuring the crest-to-crest distance in the corresponding time-course trajectories. We then calculated the period by identifying the highest local maxima in the period spectra that was close to our previous estimation.

Unfortunately, we could not use such a strategy with feedback strength values beyond  $\alpha = 10^{12} \text{ M}^{-1}$ . The latter was due to the very irregular and sparse distribution of peaks in time-course trajectories. These observations suggest that this feedback strength value defines a frontier between stochastic oscillations and bursty dynamics. In Fig. 4, *D–F*, the period distributions for mRNA, protein and dimer are shown as functions of  $\tau_1$  and  $\alpha$ . There, we can see a steep and steady increment in period as the feedback strength and transcription delay increases. Period calculations for  $\alpha > 10^{12} \text{ M}^{-1}$  were omitted for the above mentioned reasons.

## Supporting Figures

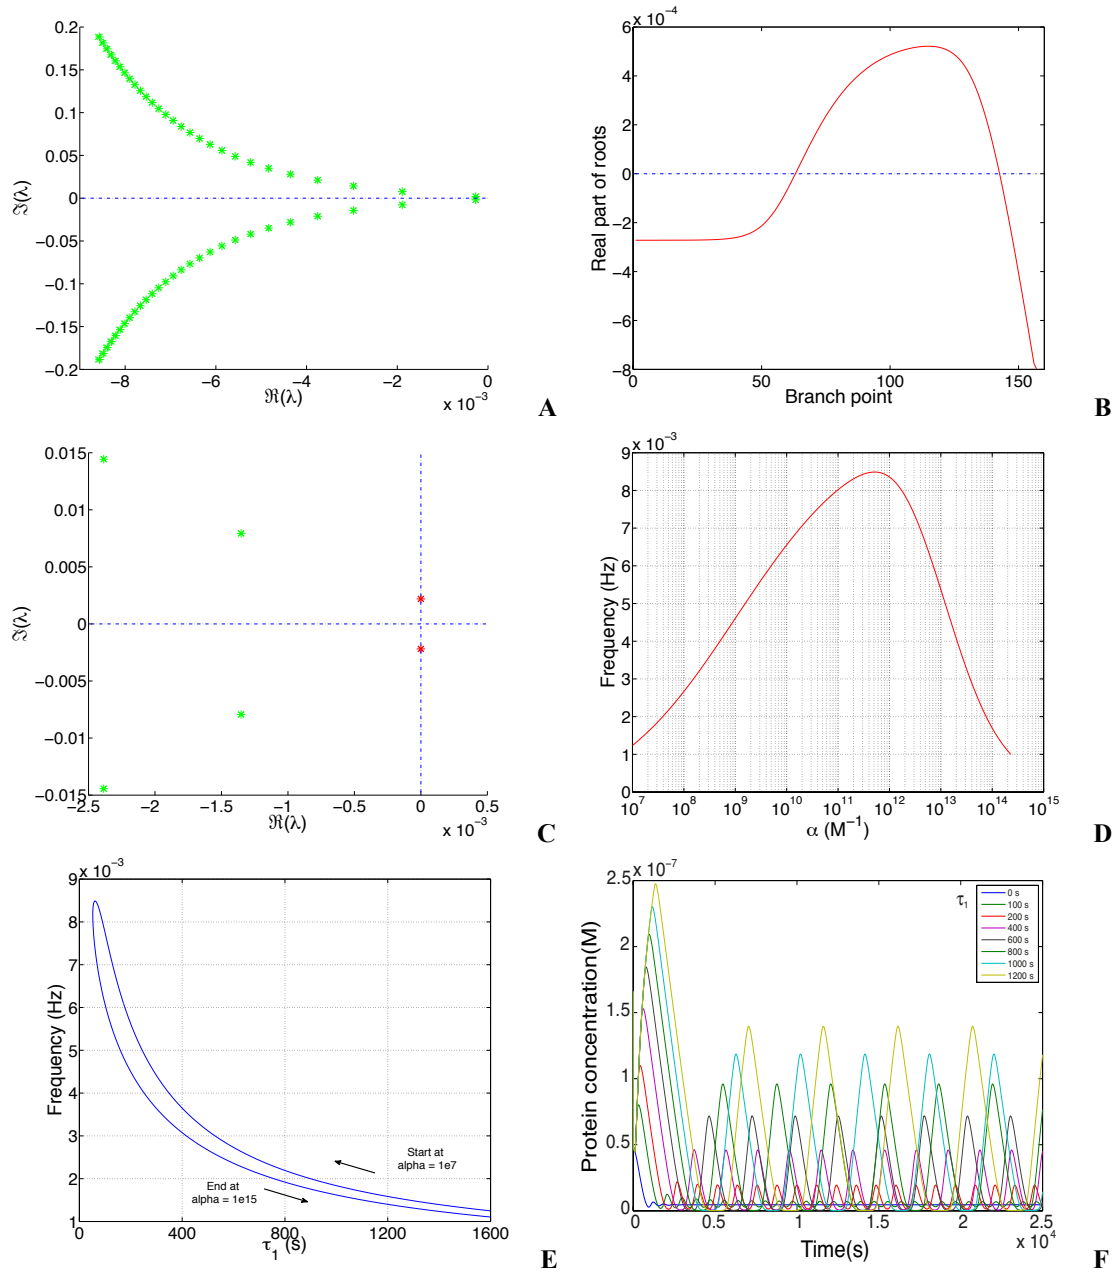

**FIGURE S1** The bifurcation analysis evidences a Hopf bifurcation. (A) First eigenvalues of the steady-state used as seed for continuation of the steady-state branch. As all eigenvalues show negative real parts, the steady-state is stable. (B) Continuation of the stability branch of steady-states. The change in sign of roots as a function of branch points reveals critical points where the steady-state change its stability. (C) The roots of the leftmost critical point touch the imaginary axis, evidencing a Hopf bifurcation. This critical point is used for continuation of the Hopf branch  $\tau_2 = 100$  s in Fig. 2. The same result is obtained if the rightmost critical point is used for continuation (not shown). (D) Frequency of the nascent periodic solution along the Hopf branch as a function of  $\alpha$  and (E) the transcription delay  $\tau_1$ . (F) Time-course evolution of the deterministic system for different  $\tau_1$  values using the parameter set in Table S1 and fixed  $\alpha = 10^{11} M^{-1}$ .

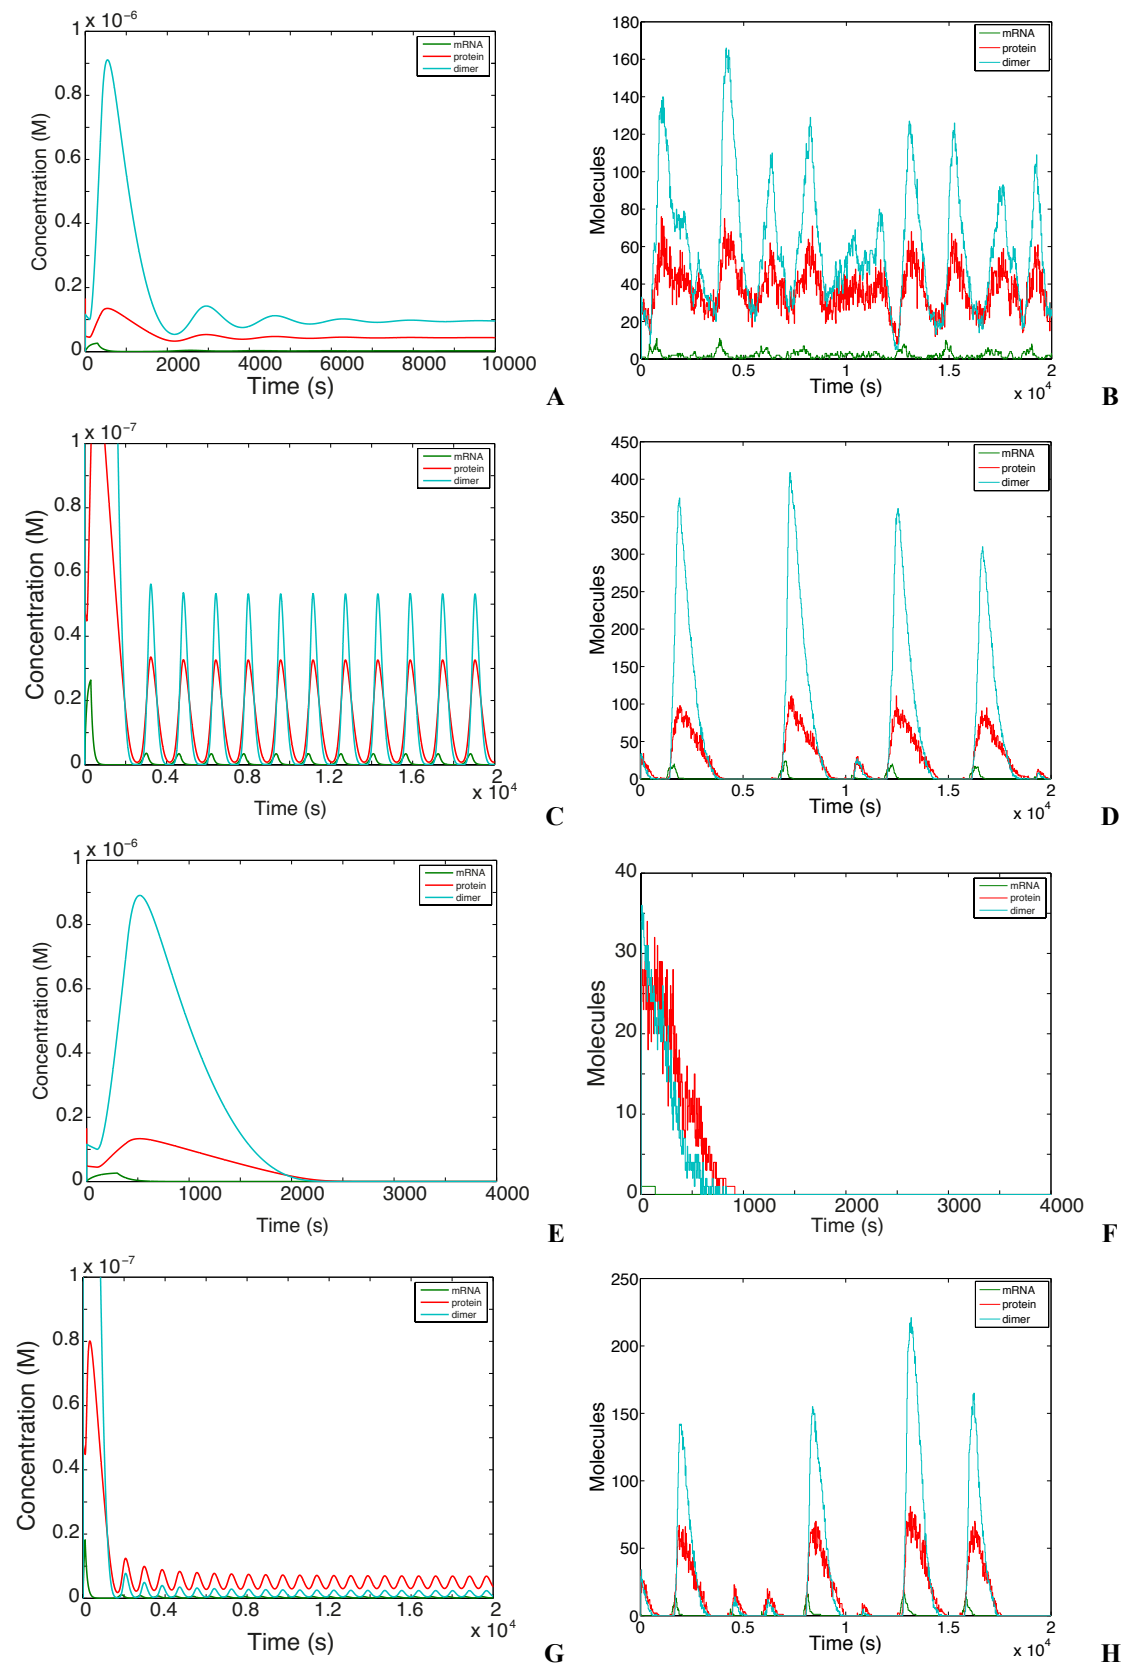

**FIGURE S2** Qualitative comparison of sample time-course trajectories: deterministic (*left column*) and stochastic (*right column*). Translation delay was fixed at  $\tau_2 = 100 \text{ s}$  while feedback strength and transcriptional delay were set to (A, B)  $\alpha = 10^8 \text{ M}^{-1}$ ,  $\tau_1 = 300 \text{ s}$ ; (C, D)  $\alpha = 10^{11} \text{ M}^{-1}$ ,  $\tau_1 = 300 \text{ s}$ ; (E, F)  $\alpha = 10^{15} \text{ M}^{-1}$ ,  $\tau_1 = 300 \text{ s}$  and (G, H)  $\alpha = 10^{11} \text{ M}^{-1}$ ,  $\tau_1 = 100 \text{ s}$ .

INPUT DATA: Reactions defined by reactant and product vectors. Reactions are tagged as non-delayed or delayed. If delayed, reactions are tagged as consuming or non-consuming. Stoichiometry. Reaction rates. Initial state  $X(0)$ . Simulation time  $T$ . Delays.

RESULT: State dynamics.

PSEUDO-CODE:

```

begin
  while  $t < T$  do

    generate  $U_1$  and  $U_2$  as  $U(0,1)$  random variables
     $a_0(X(t)) = \text{sum}\{j=1:m, a_j(X(t))\}$ 
     $\theta = \ln\{1/U_1\}/a_0(X(t))$ 
    select  $j$  such that
       $\text{sum}\{k=1:j-1, a_k(X(t))\} < U_2 * a_0(X(t)) \leq \text{sum}\{k=1:j, a_k(X(t))\}$ 

    if delayed reactions are scheduled within  $(t, t+\theta]$  then
      let  $k$  be the delayed reaction scheduled next at time  $t+\tau$ 
      if  $k$  is a consuming delayed reaction then
         $X(t+\tau) = X(t) + u_k^p$  (update products only)
      else
         $X(t+\tau) = X(t) + u_k$ 
         $t = t + \tau$ 

    else

      if  $j$  is not a delayed reaction then
         $X(t+\theta) = X(t) + u_j$ 
      else
        record time  $t + \theta + \tau_j$  for delayed reaction  $j$  with delay  $\tau_j$ 
        if  $j$  is a consuming delayed reaction then
           $X(t+\theta) = X(t) + u_j^r$  (update reactants)
         $t = t + \theta$ 

  end

```

**FIGURE S3** Delay Stochastic Simulation Algorithm. The algorithm is based on the reaction rejection method and accounts for consuming and non-consuming reactions. In contrast to the Gillespie SSA, the DSSA makes explicit distinction between reaction waiting times ( $\theta$ , in blue) and reaction delays ( $\tau$ , in red). This algorithm was proved to yield exact trajectories from the DCME in (6). Pseudo-code reproduced from (7).

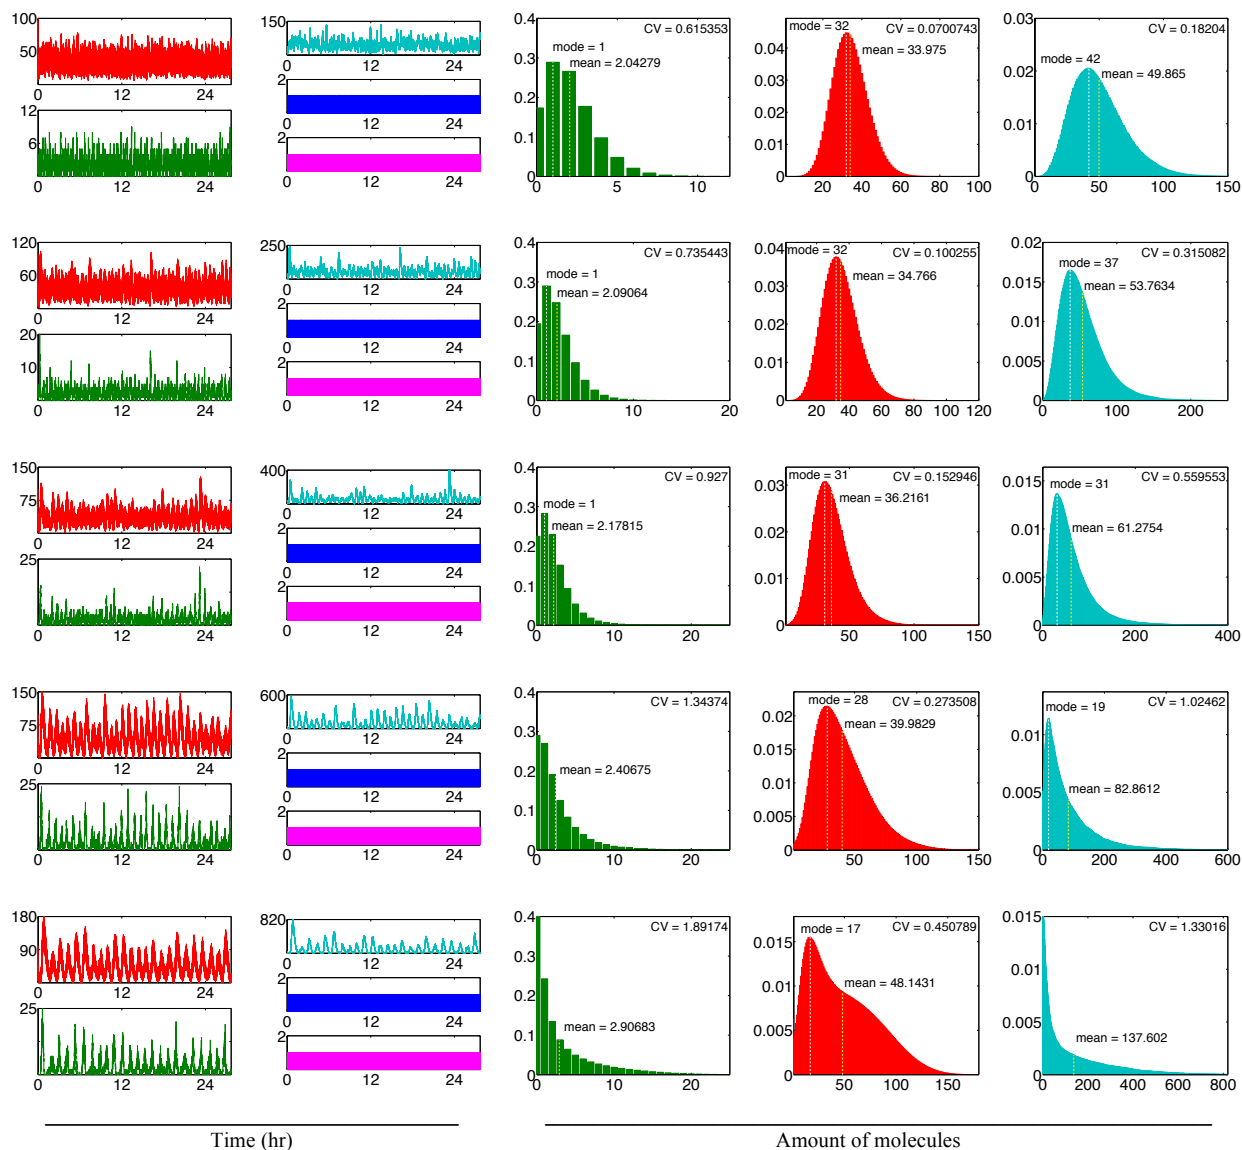

**FIGURE S4** Sample stochastic trajectories (*first two columns*) and stationary PDFs over 100 stochastic trajectories (*last three columns*) for feedback strength fixed at  $\alpha = 10^8 \text{ M}^{-1}$ . Each row corresponds to a different feedback transcription delay, from top to bottom:  $\tau_1 = 100 \text{ s}$ ,  $\tau_1 = 300 \text{ s}$ ,  $\tau_1 = 500 \text{ s}$ ,  $\tau_1 = 800 \text{ s}$  and  $\tau_1 = 1200 \text{ s}$ . Protein, mRNA, dimer, DNA and the repressed complex are shown in red, green, teal, blue and pink, respectively.

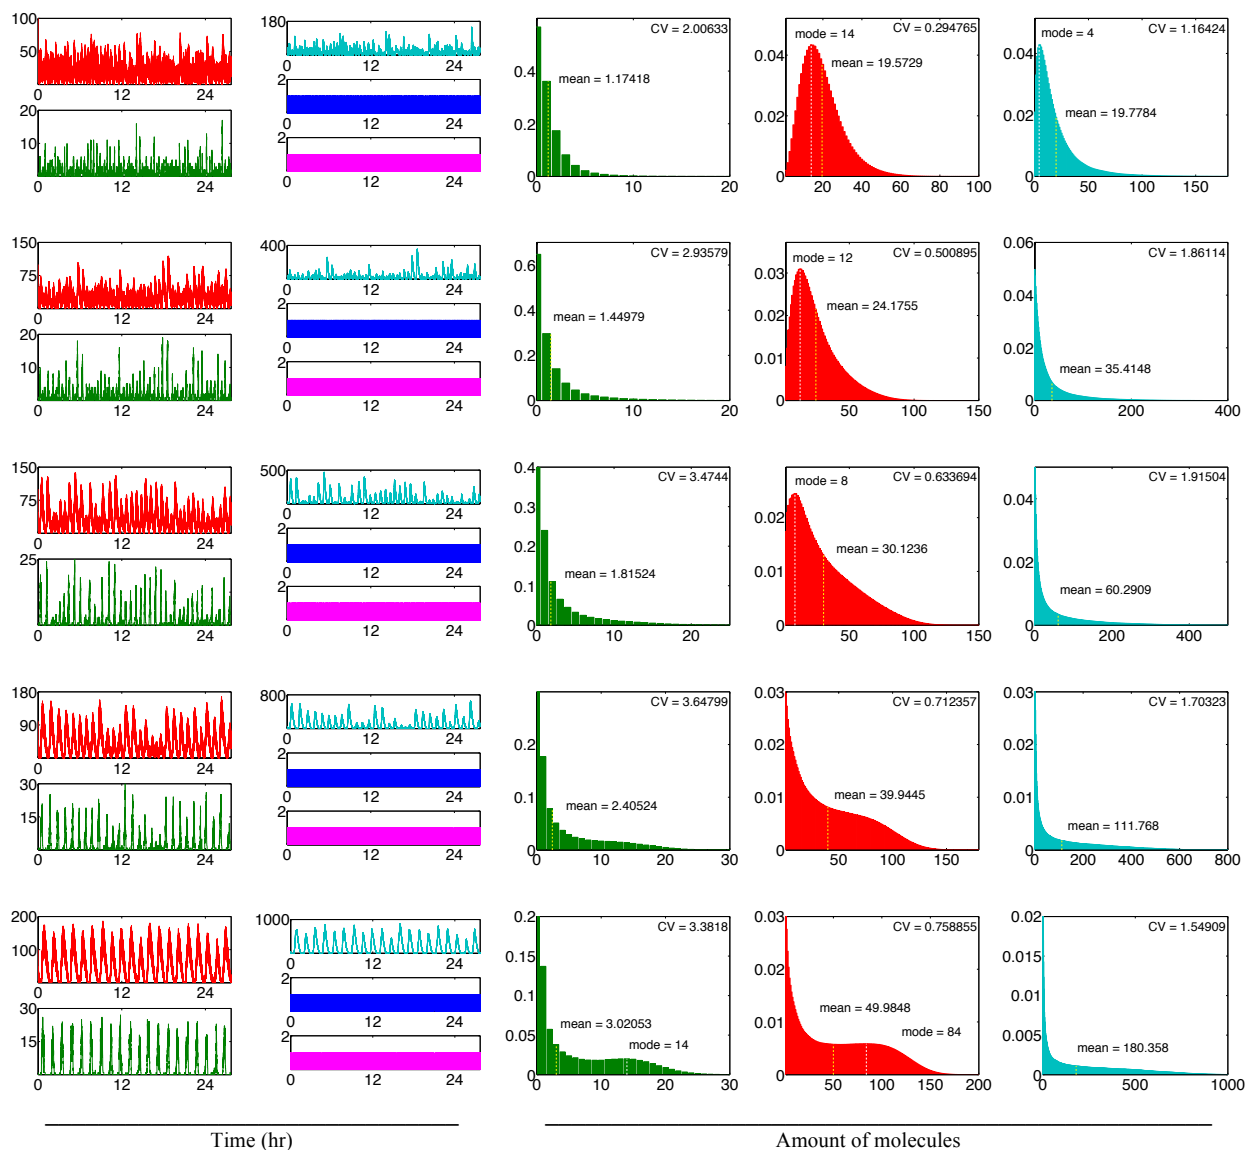

**FIGURE S5** Sample stochastic trajectories (*first two columns*) and stationary PDFs over 100 stochastic trajectories (*last three columns*) for feedback strength fixed at  $\alpha = 10^9 \text{ M}^{-1}$ . Each row corresponds to a different feedback transcription delay, from top to bottom:  $\tau_1 = 100 \text{ s}$ ,  $\tau_1 = 300 \text{ s}$ ,  $\tau_1 = 500 \text{ s}$ ,  $\tau_1 = 800 \text{ s}$  and  $\tau_1 = 1200 \text{ s}$ . Protein, mRNA, dimer, DNA and the repressed complex are shown in red, green, teal, blue and pink, respectively.



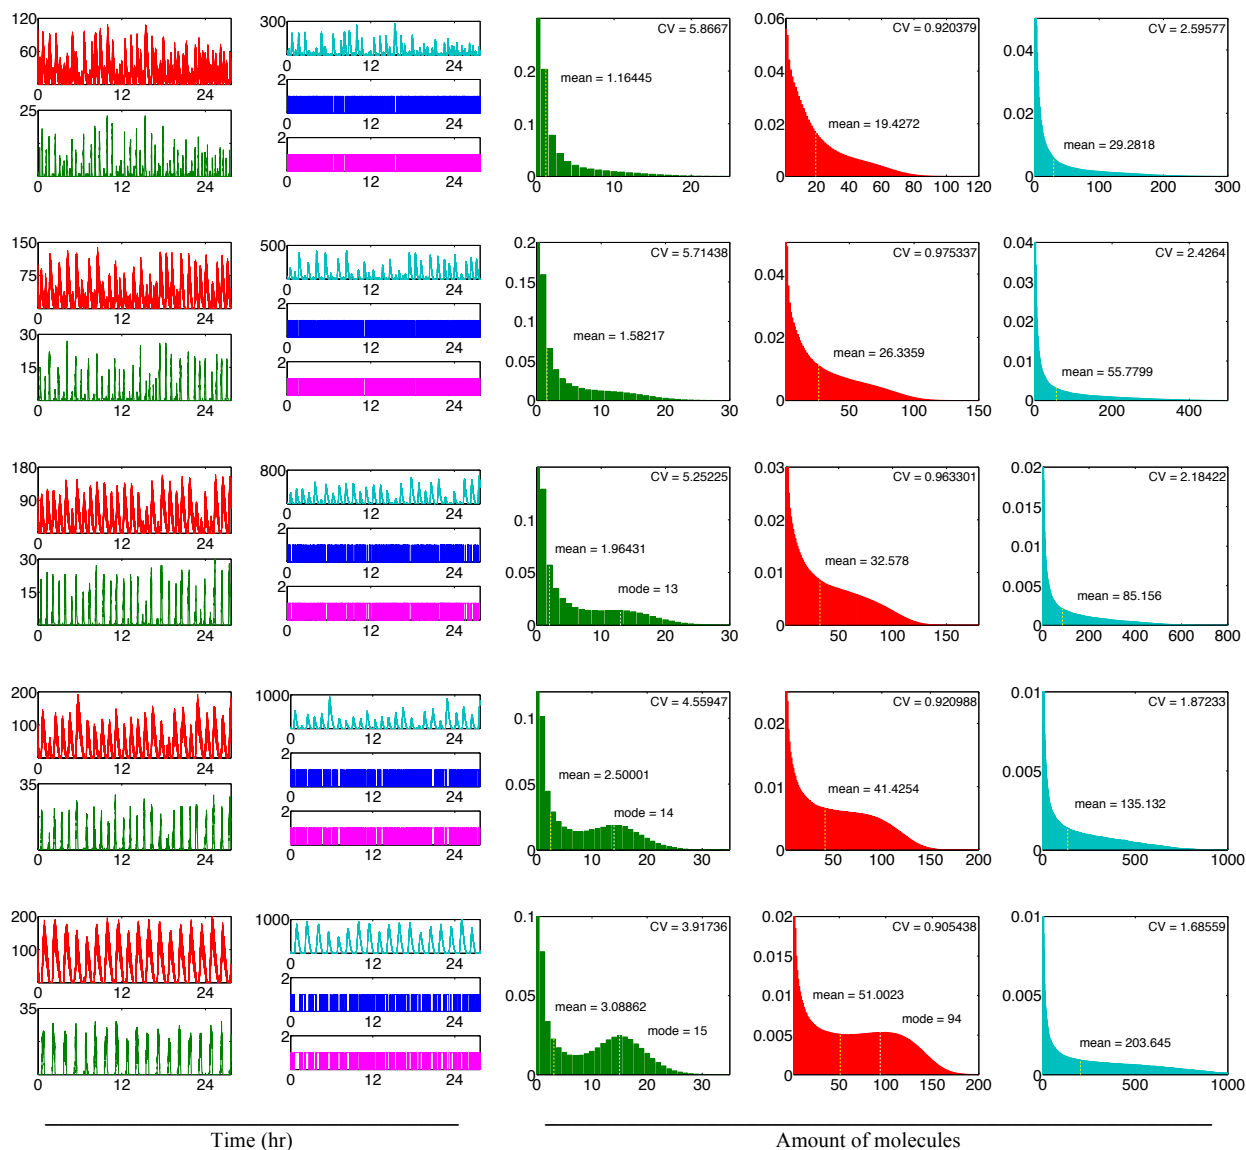

**FIGURE S6** Sample stochastic trajectories (*first two columns*) and stationary PDFs over 100 stochastic trajectories (*last three columns*) for feedback strength fixed at  $\alpha = 10^{10} \text{ M}^{-1}$ . Each row corresponds to a different feedback transcription delay, from top to bottom:  $\tau_1 = 100 \text{ s}$ ,  $\tau_1 = 300 \text{ s}$ ,  $\tau_1 = 500 \text{ s}$ ,  $\tau_1 = 800 \text{ s}$  and  $\tau_1 = 1200 \text{ s}$ . Protein, mRNA, dimer, DNA and the repressed complex are shown in red, green, teal, blue and pink, respectively.

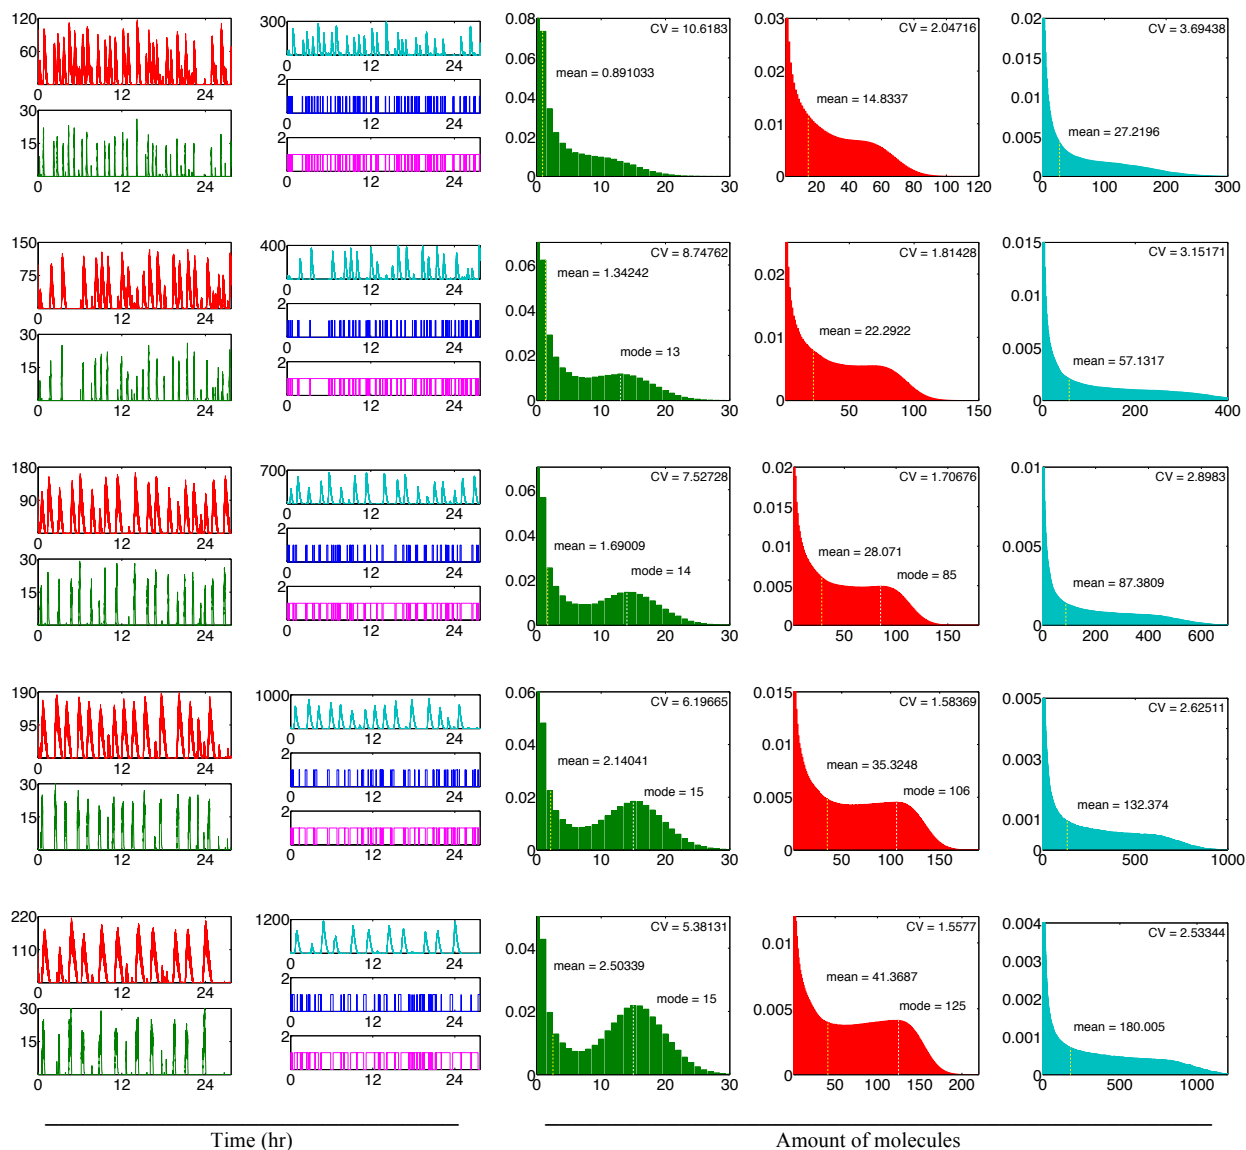

**FIGURE S7** Sample stochastic trajectories (*first two columns*) and stationary PDFs over 100 stochastic trajectories (*last three columns*) for feedback strength fixed at  $\alpha = 10^{11} \text{ M}^{-1}$ . Each row corresponds to a different feedback transcription delay, from top to bottom:  $\tau_1 = 100 \text{ s}$ ,  $\tau_1 = 300 \text{ s}$ ,  $\tau_1 = 500 \text{ s}$ ,  $\tau_1 = 800 \text{ s}$  and  $\tau_1 = 1200 \text{ s}$ . Protein, mRNA, dimer, DNA and the repressed complex are shown in red, green, teal, blue and pink, respectively.

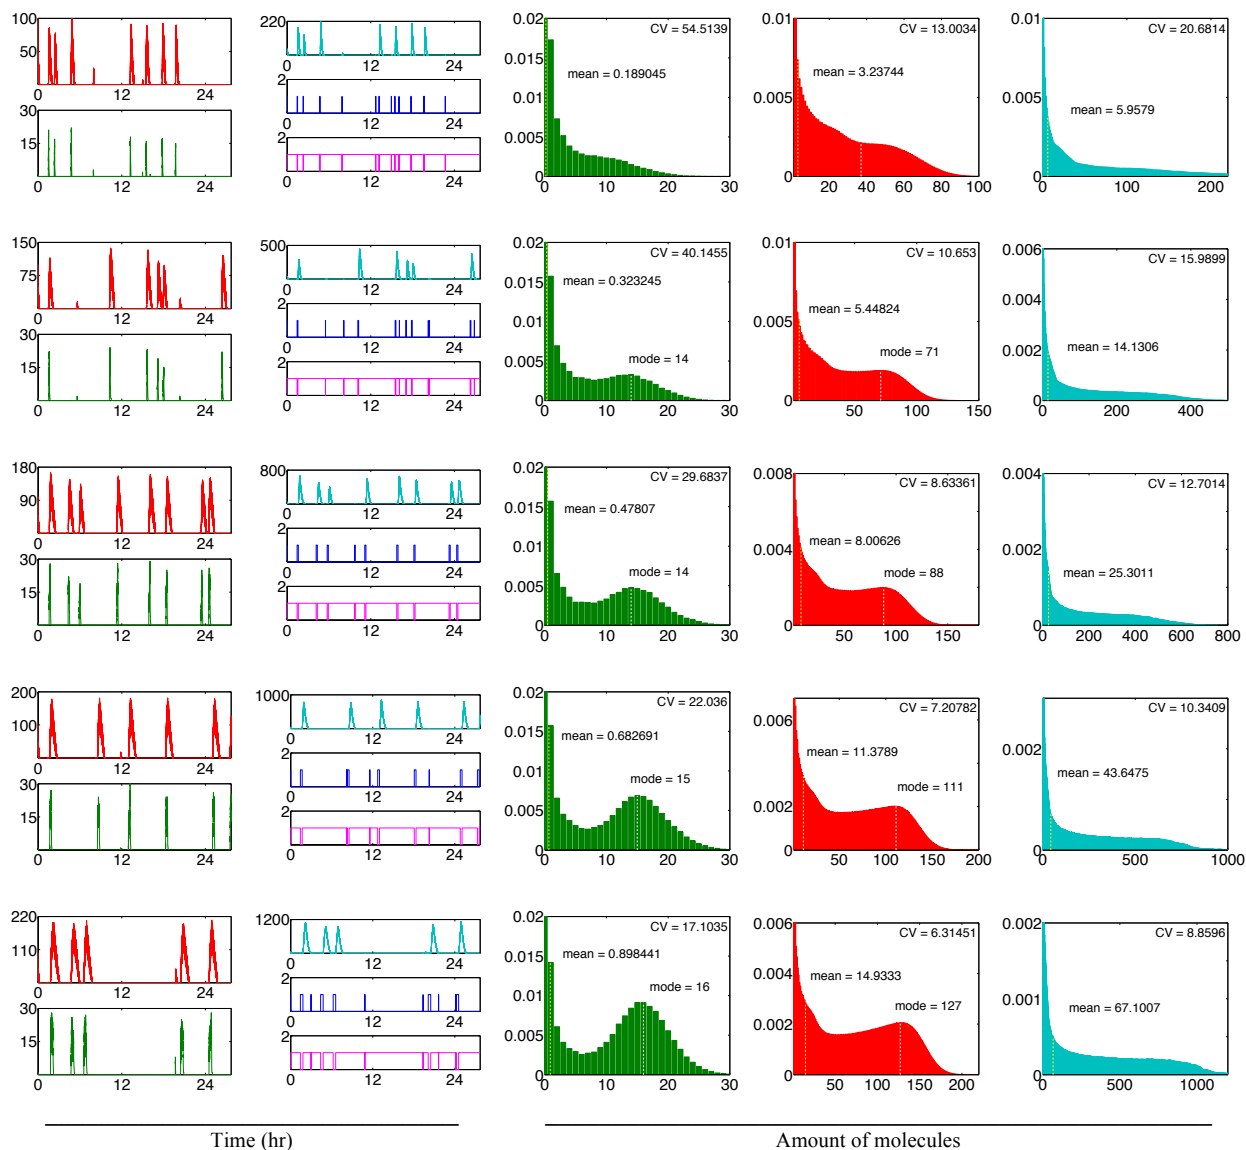

**FIGURE S8** Sample stochastic trajectories (*first two columns*) and stationary PDFs over 100 stochastic trajectories (*last three columns*) for feedback strength fixed at  $\alpha = 10^{12} \text{ M}^{-1}$ . Each row corresponds to a different feedback transcription delay, from top to bottom:  $\tau_1 = 100 \text{ s}$ ,  $\tau_1 = 300 \text{ s}$ ,  $\tau_1 = 500 \text{ s}$ ,  $\tau_1 = 800 \text{ s}$  and  $\tau_1 = 1200 \text{ s}$ . Protein, mRNA, dimer, DNA and the repressed complex are shown in red, green, teal, blue and pink, respectively.

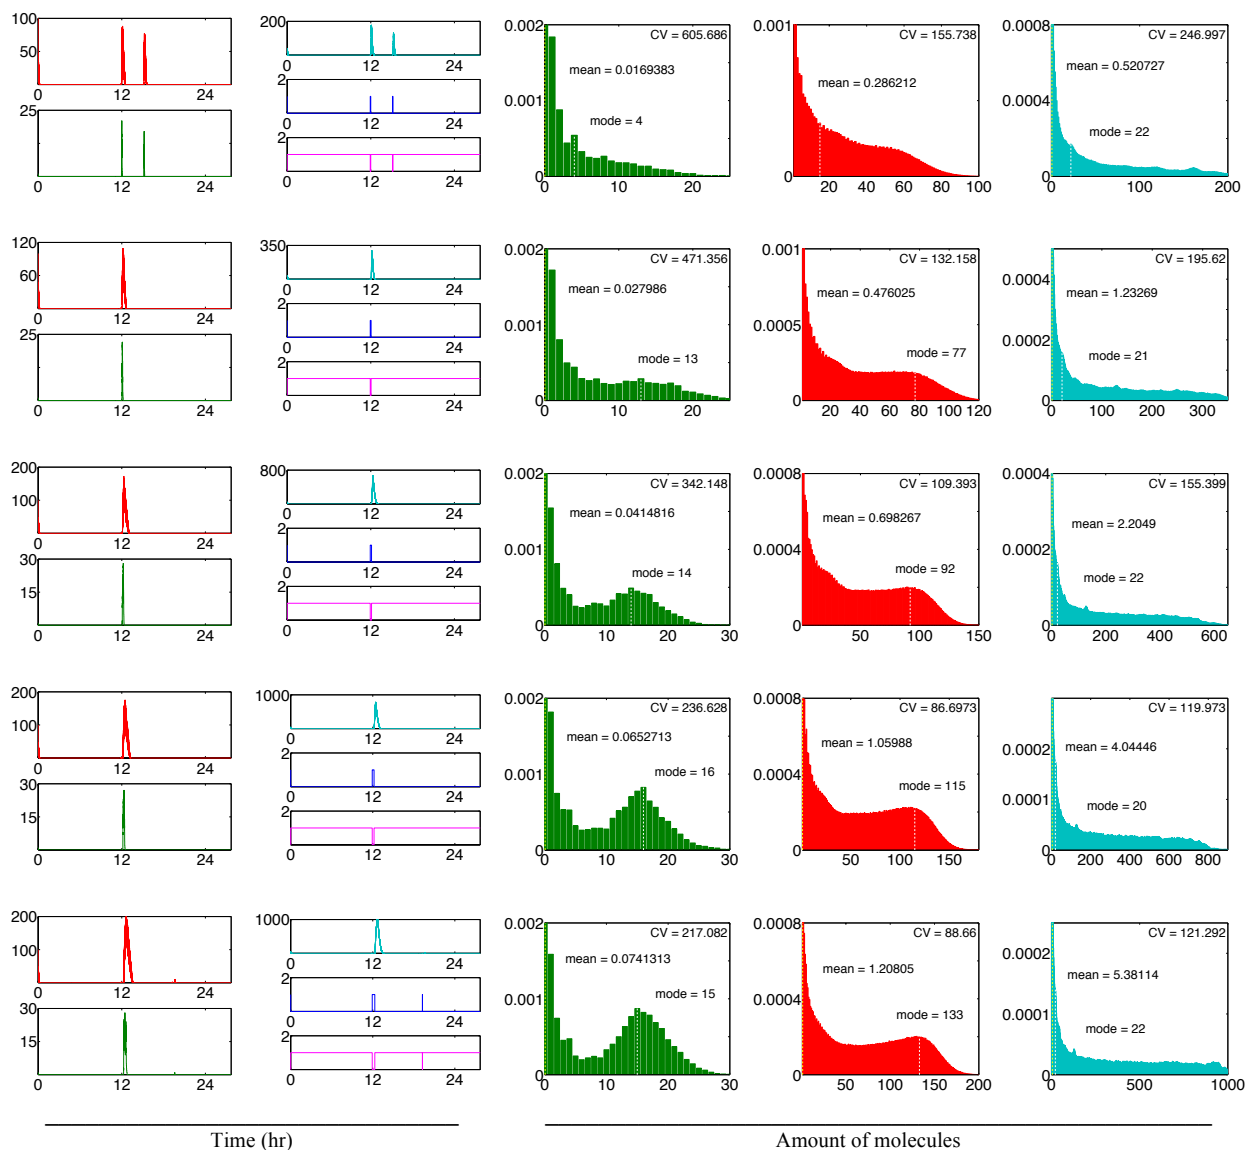

**FIGURE S9** Sample stochastic trajectories (*first two columns*) and stationary PDFs over 100 stochastic trajectories (*last three columns*) for feedback strength fixed at  $\alpha = 10^{13} \text{ M}^{-1}$ . Each row corresponds to a different feedback transcription delay, from top to bottom:  $\tau_1 = 100 \text{ s}$ ,  $\tau_1 = 300 \text{ s}$ ,  $\tau_1 = 500 \text{ s}$ ,  $\tau_1 = 800 \text{ s}$  and  $\tau_1 = 1200 \text{ s}$ . Protein, mRNA, dimer, DNA and the repressed complex are shown in red, green, teal, blue and pink, respectively.

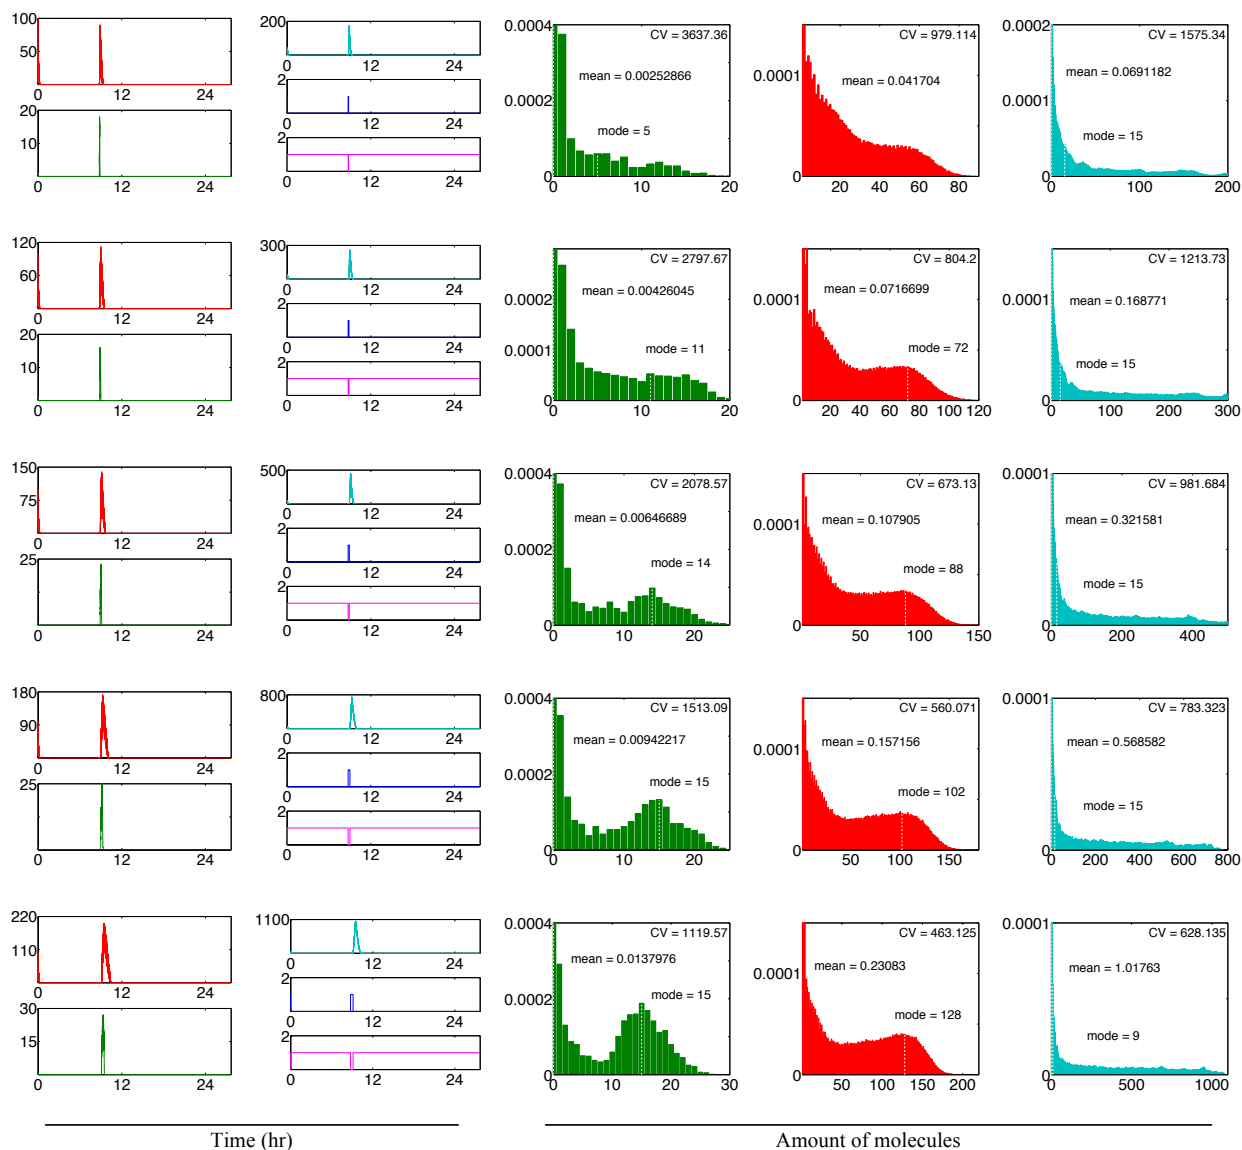

**FIGURE S10** Sample stochastic trajectories (*first two columns*) and stationary PDFs over 100 stochastic trajectories (*last three columns*) for feedback strength fixed at  $\alpha = 10^{14} \text{ M}^{-1}$ . Each row corresponds to a different feedback transcription delay, from top to bottom:  $\tau_1 = 100 \text{ s}$ ,  $\tau_1 = 300 \text{ s}$ ,  $\tau_1 = 500 \text{ s}$ ,  $\tau_1 = 800 \text{ s}$  and  $\tau_1 = 1200 \text{ s}$ . Protein, mRNA, dimer, DNA and the repressed complex are shown in red, green, teal, blue and pink, respectively.

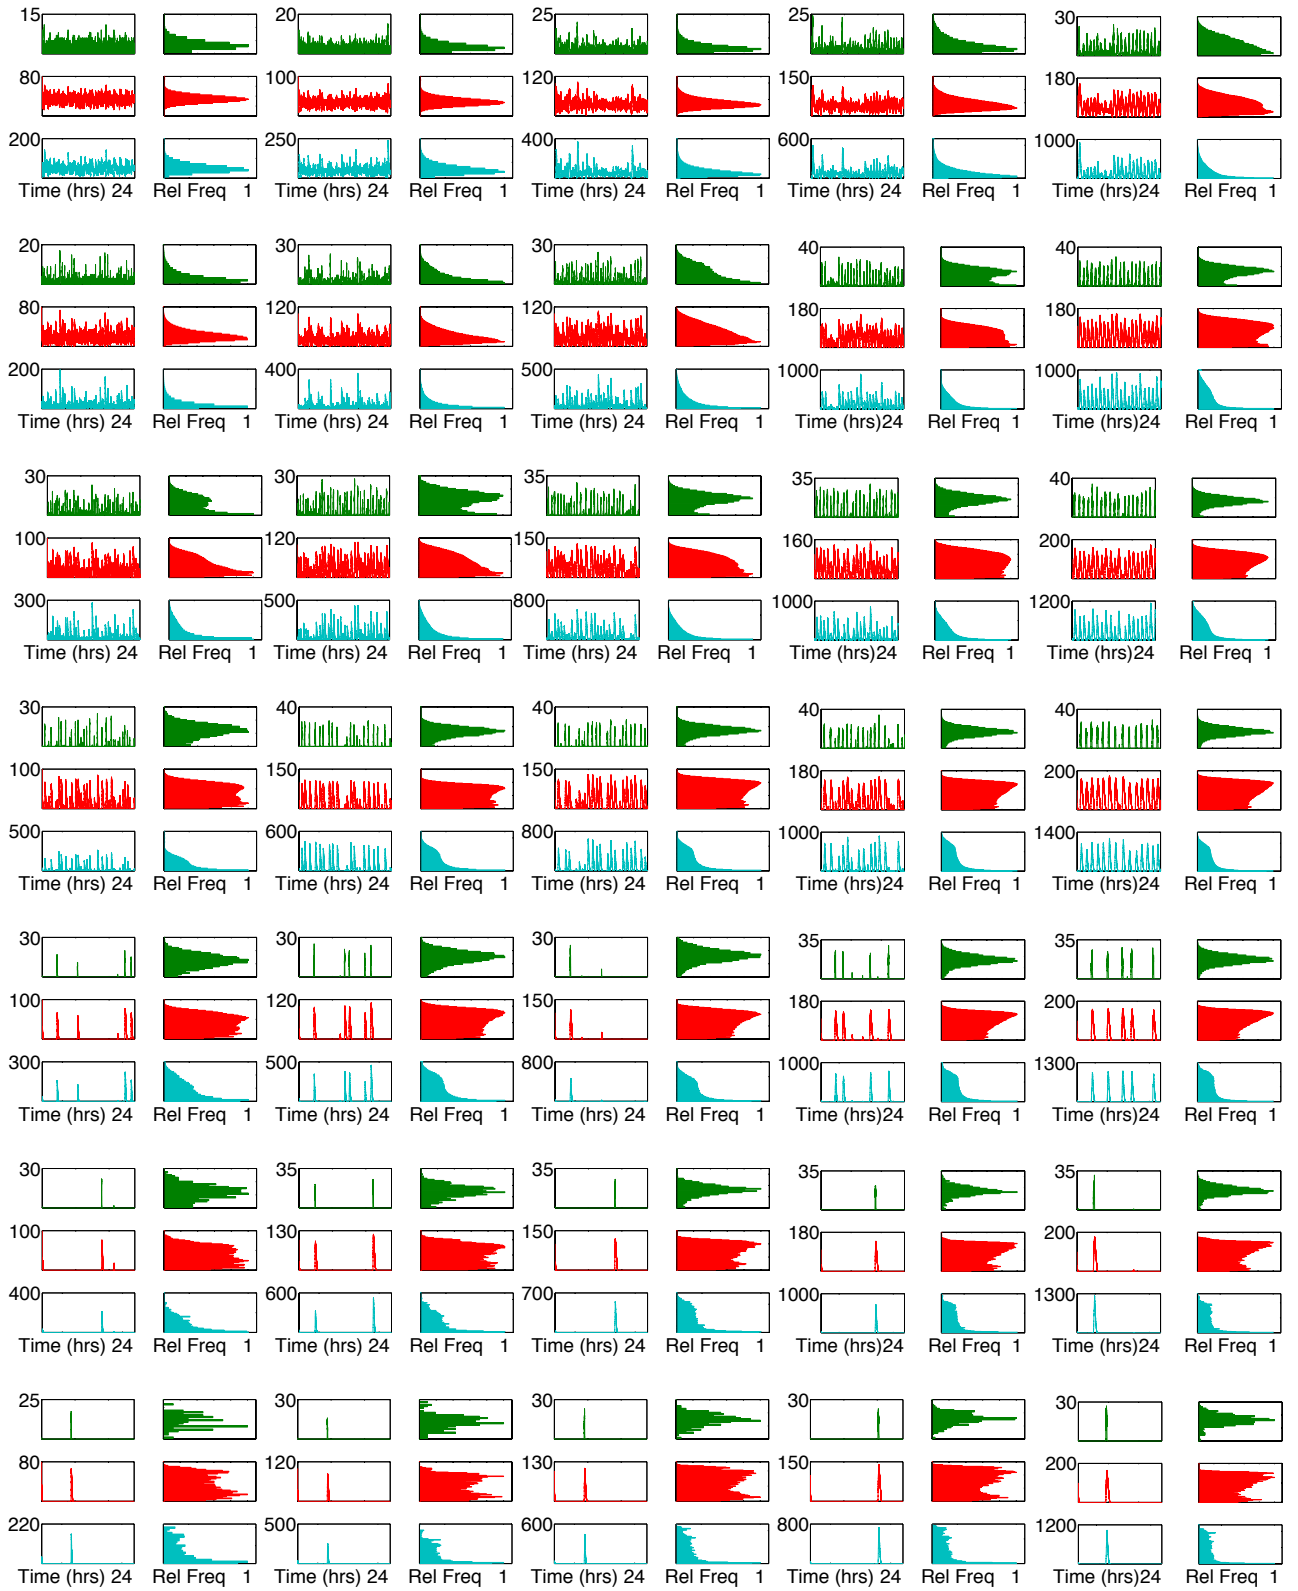

**FIGURE S11** Sample stochastic realizations (*time-course trajectories*) and amplitude distributions over 100 stochastic trajectories (*horizontal histograms*). All vertical axes represent molecule numbers. Each row corresponds to different feedback strengths, from top to bottom:  $\alpha = 10^8 \text{ M}^{-1}$ ,  $\alpha = 10^9 \text{ M}^{-1}$ ,  $\alpha = 10^{10} \text{ M}^{-1}$ ,  $\alpha = 10^{11} \text{ M}^{-1}$ ,  $\alpha = 10^{12} \text{ M}^{-1}$ ,  $\alpha = 10^{13} \text{ M}^{-1}$  and  $\alpha = 10^{14} \text{ M}^{-1}$ . Each column corresponds to a different transcription delay, from left to right:  $\tau_1 = 100 \text{ s}$ ,  $\tau_1 = 300 \text{ s}$ ,  $\tau_1 = 500 \text{ s}$ ,  $\tau_1 = 800 \text{ s}$  and  $\tau_1 = 1200 \text{ s}$ . Protein, mRNA and dimer are shown in red, green and teal, respectively.

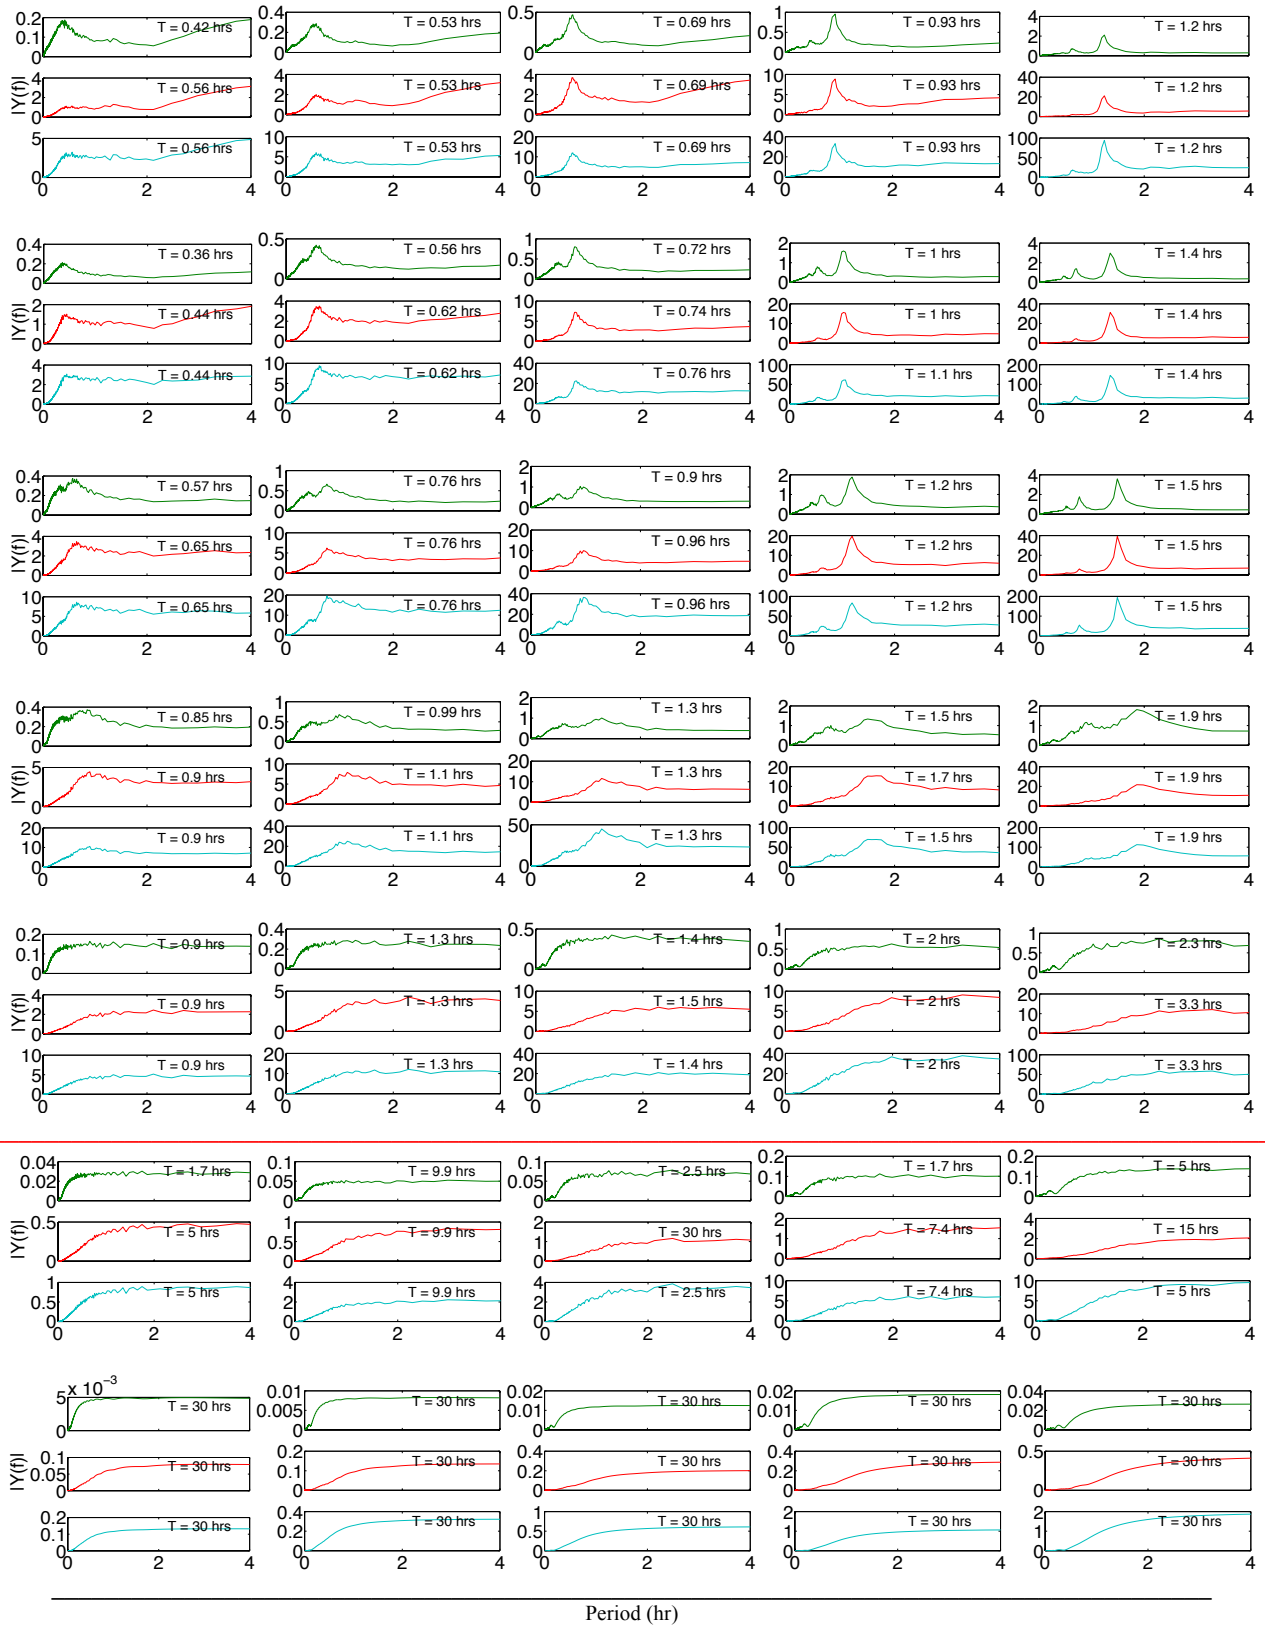

**FIGURE S12** Period estimation from frequency spectra obtained by FFT averaged over 100 stochastic trajectories. Each row corresponds to a different feedback strength, from top to bottom:  $\alpha = 10^8 \text{ M}^{-1}$ ,  $\alpha = 10^9 \text{ M}^{-1}$ ,  $\alpha = 10^{10} \text{ M}^{-1}$ ,  $\alpha = 10^{11} \text{ M}^{-1}$ ,  $\alpha = 10^{12} \text{ M}^{-1}$ ,  $\alpha = 10^{13} \text{ M}^{-1}$  and  $\alpha = 10^{14} \text{ M}^{-1}$ . Each column corresponds to a different transcription delay, from left to right:  $\tau_1 = 100 \text{ s}$ ,  $\tau_1 = 300 \text{ s}$ ,  $\tau_1 = 500 \text{ s}$ ,  $\tau_1 = 800 \text{ s}$  and  $\tau_1 = 1200 \text{ s}$ . Protein, mRNA and dimer are shown in red, green and teal, respectively. Period estimation becomes unreliable beyond  $\alpha = 10^{12} \text{ M}^{-1}$  (red horizontal line), marking the borderline with the burst expression regime.

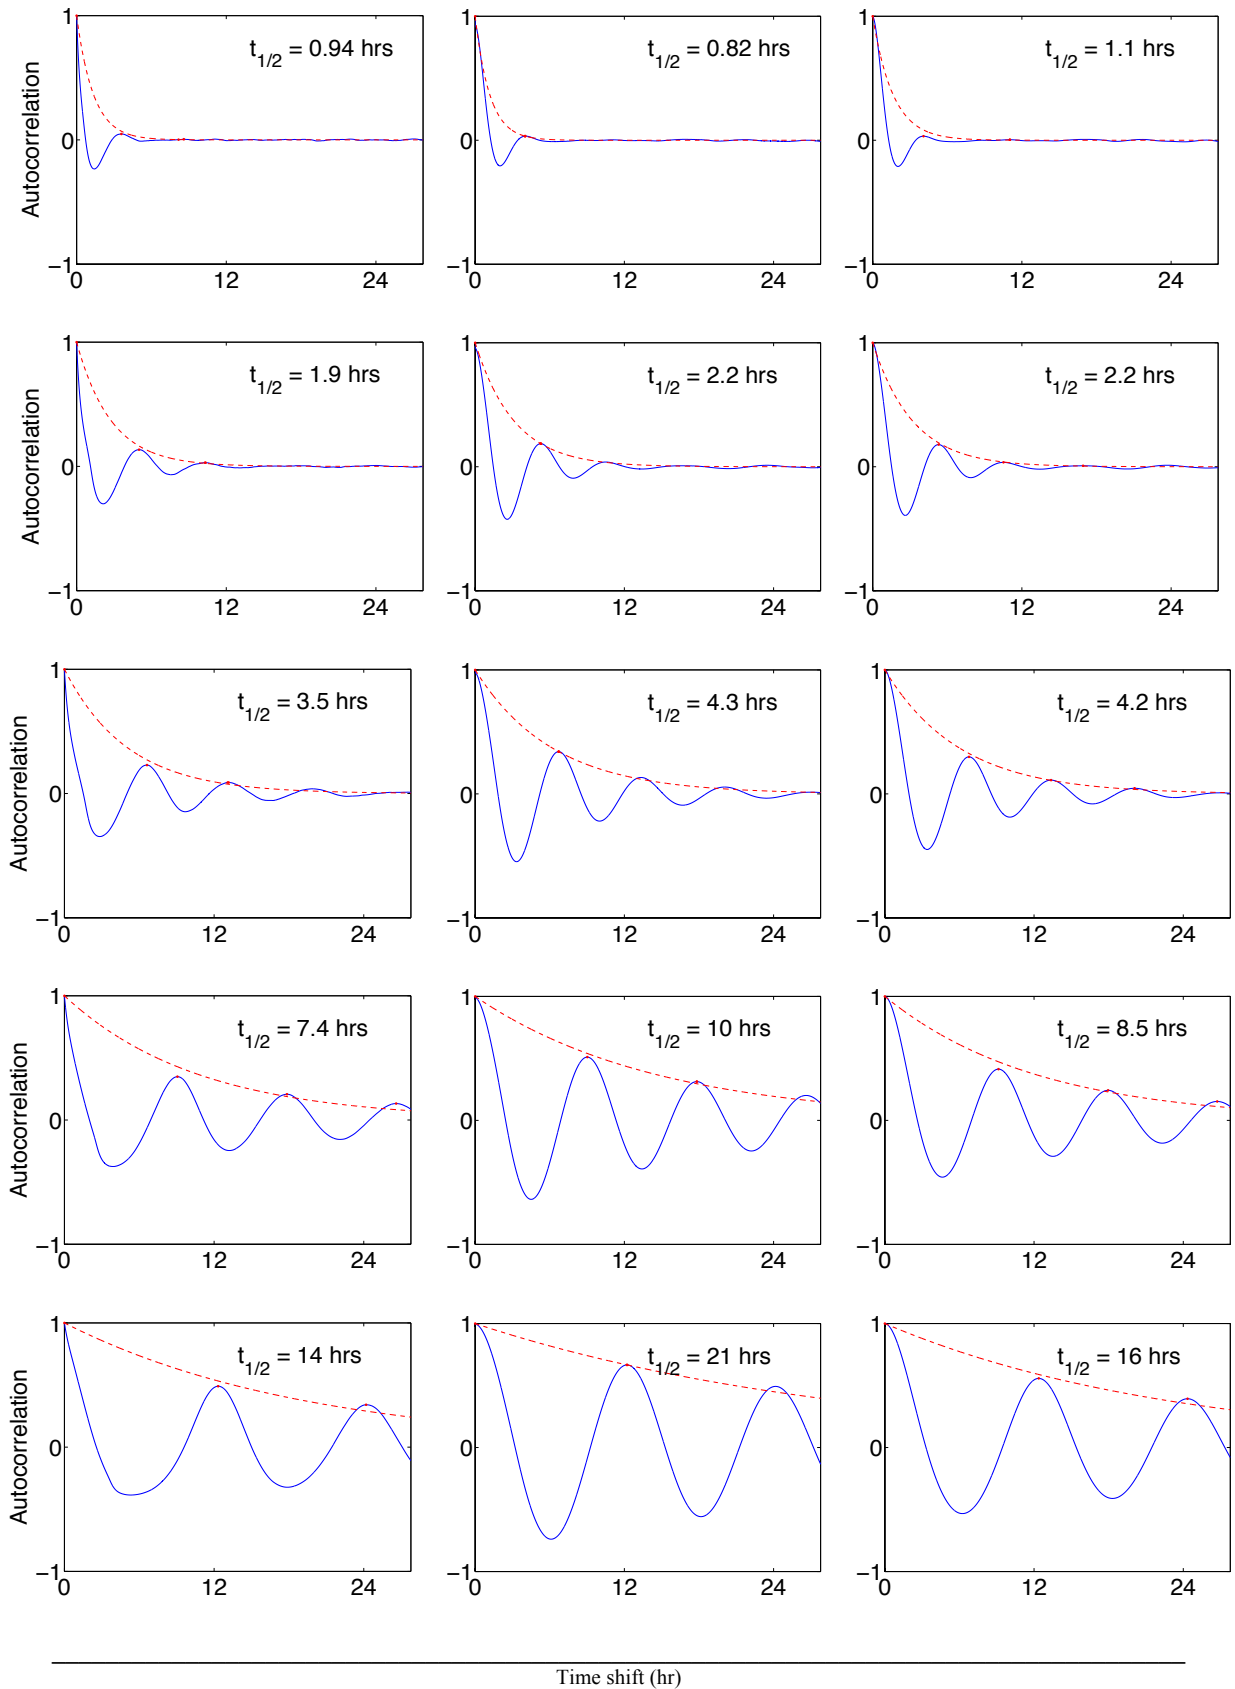

**FIGURE S13** Autocorrelation function half-lives measure memory loss of stochastic oscillations. Each panel shows autocorrelation averaged over 100 stochastic trajectories and its half-lives  $t_{1/2}$  for feedback strength fixed at  $\alpha = 10^8 \text{ M}^{-1}$ . mRNA, protein and dimer are shown in left, center and right columns, respectively. Each row corresponds to a different feedback transcription delay, from top to bottom:  $\tau_1 = 100 \text{ s}$ ,  $\tau_1 = 300 \text{ s}$ ,  $\tau_1 = 500 \text{ s}$ ,  $\tau_1 = 800 \text{ s}$  and  $\tau_1 = 1200 \text{ s}$ .



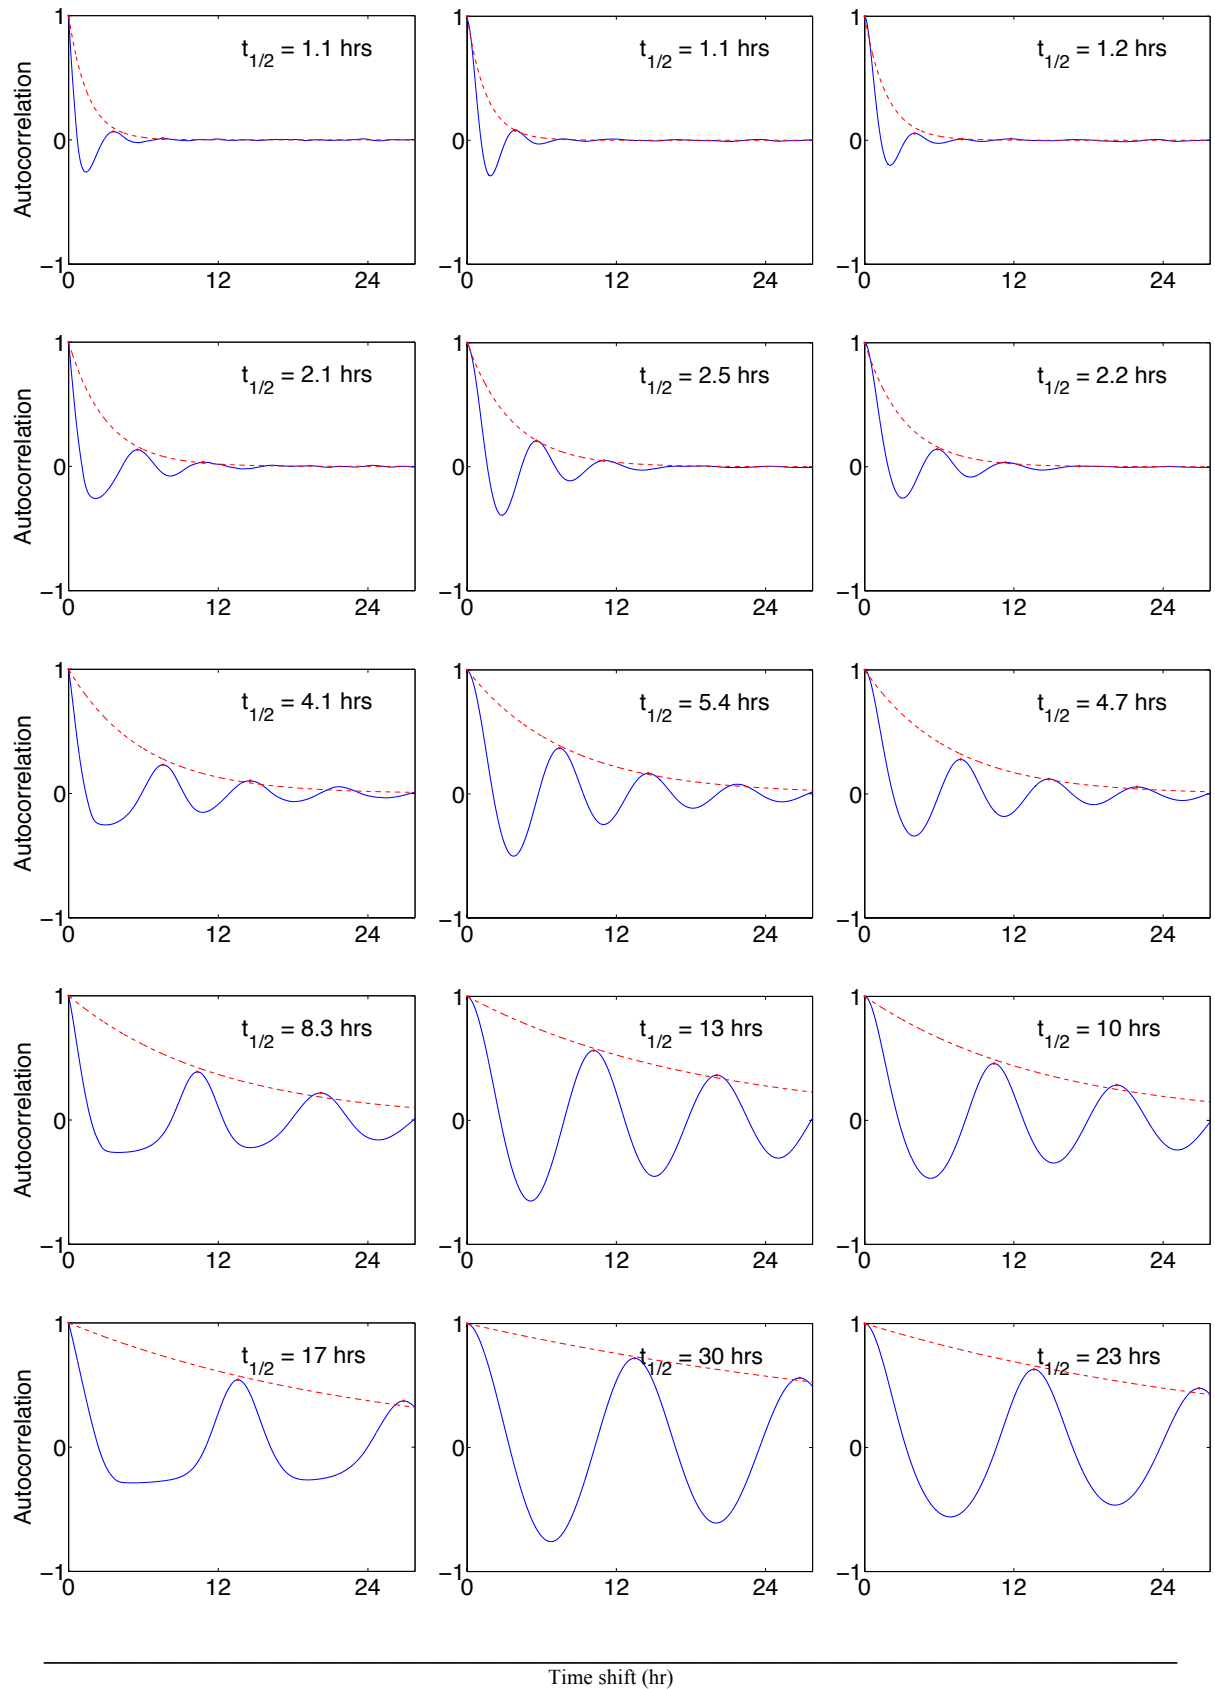

**FIGURE S14** Autocorrelation function half-lives measure memory loss of stochastic oscillations. Each panel shows autocorrelation averaged over 100 stochastic trajectories and its half-lives  $t_{1/2}$  for feedback strength fixed at  $\alpha = 10^9 \text{ M}^{-1}$ . mRNA, protein and dimer are shown in left, center and right columns, respectively. Each row corresponds to a different feedback transcription delay, from top to bottom:  $\tau_1 = 100$  s,  $\tau_1 = 300$  s,  $\tau_1 = 500$  s,  $\tau_1 = 800$  s and  $\tau_1 = 1200$  s.

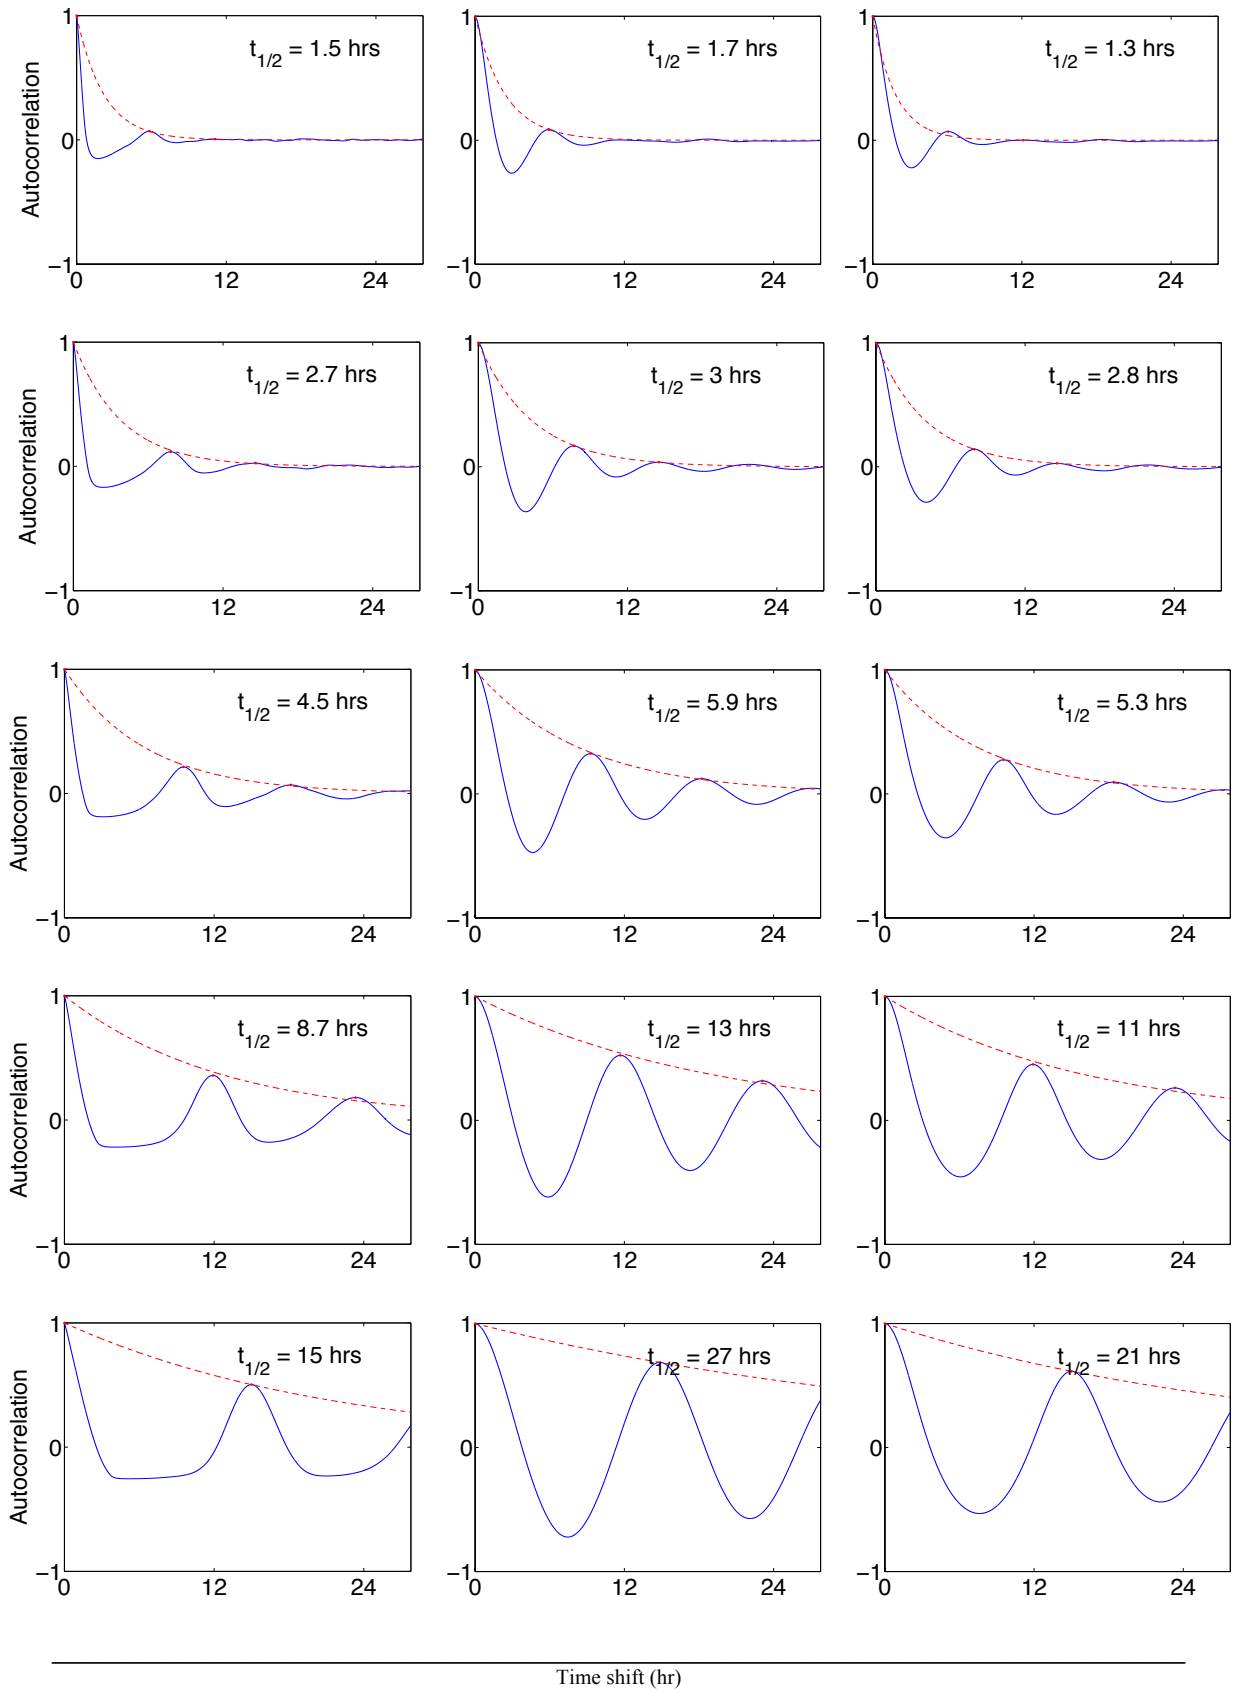

**FIGURE S15** Autocorrelation function half-lives measure memory loss of stochastic oscillations. Each panel shows autocorrelation averaged over 100 stochastic trajectories and its half-lives  $t_{1/2}$  for feedback strength fixed at  $\alpha = 10^{10} \text{ M}^{-1}$ . mRNA, protein and dimer are shown in left, center and right columns, respectively. Each row corresponds to a different feedback transcription delay, from top to bottom:  $\tau_1 = 100 \text{ s}$ ,  $\tau_1 = 300 \text{ s}$ ,  $\tau_1 = 500 \text{ s}$ ,  $\tau_1 = 800 \text{ s}$  and  $\tau_1 = 1200 \text{ s}$ .

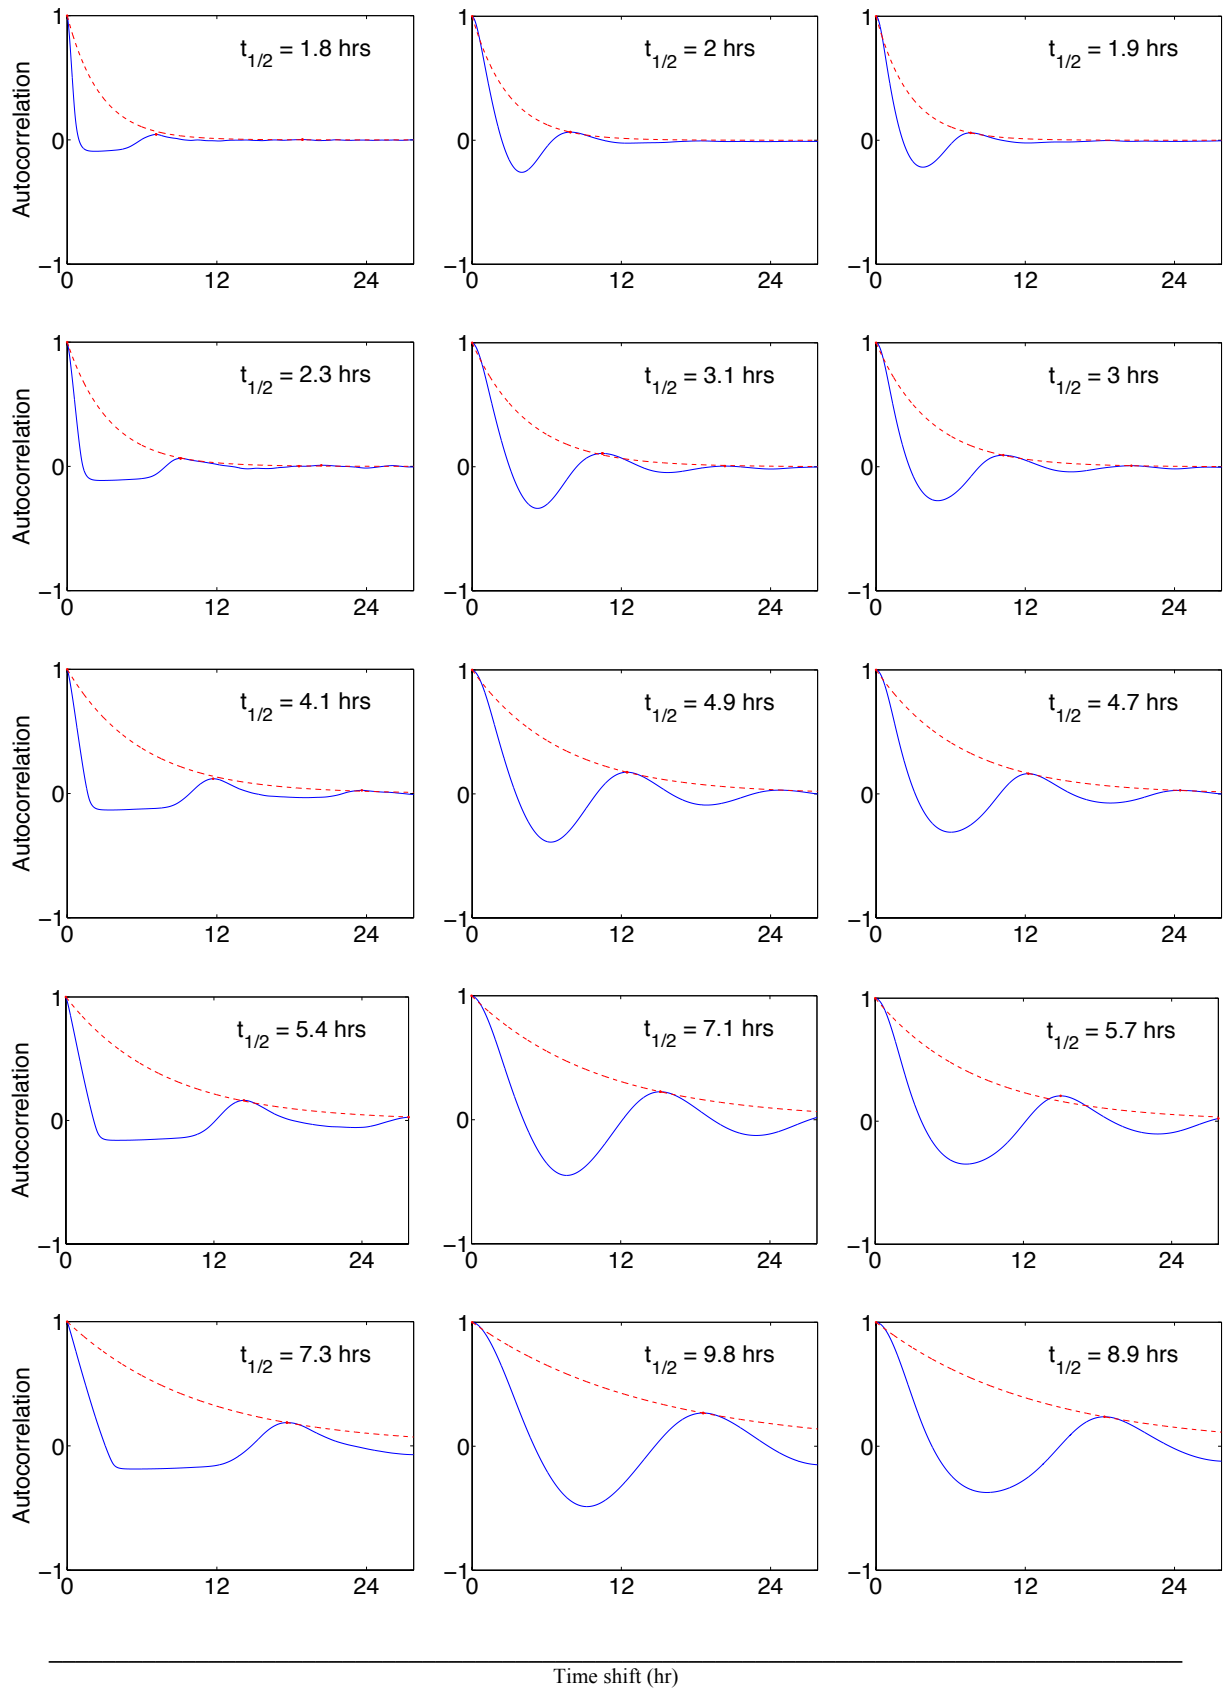

**FIGURE S16** Autocorrelation function half-lives measure memory loss of stochastic oscillations. Each panel shows autocorrelation averaged over 100 stochastic trajectories and its half-lives  $t_{1/2}$  for feedback strength fixed at  $\alpha = 10^{11} \text{ M}^{-1}$ . mRNA, protein and dimer are shown in left, center and right columns, respectively. Each row corresponds to a different feedback transcription delay, from top to bottom:  $\tau_1 = 100$  s,  $\tau_1 = 300$  s,  $\tau_1 = 500$  s,  $\tau_1 = 800$  s and  $\tau_1 = 1200$  s.

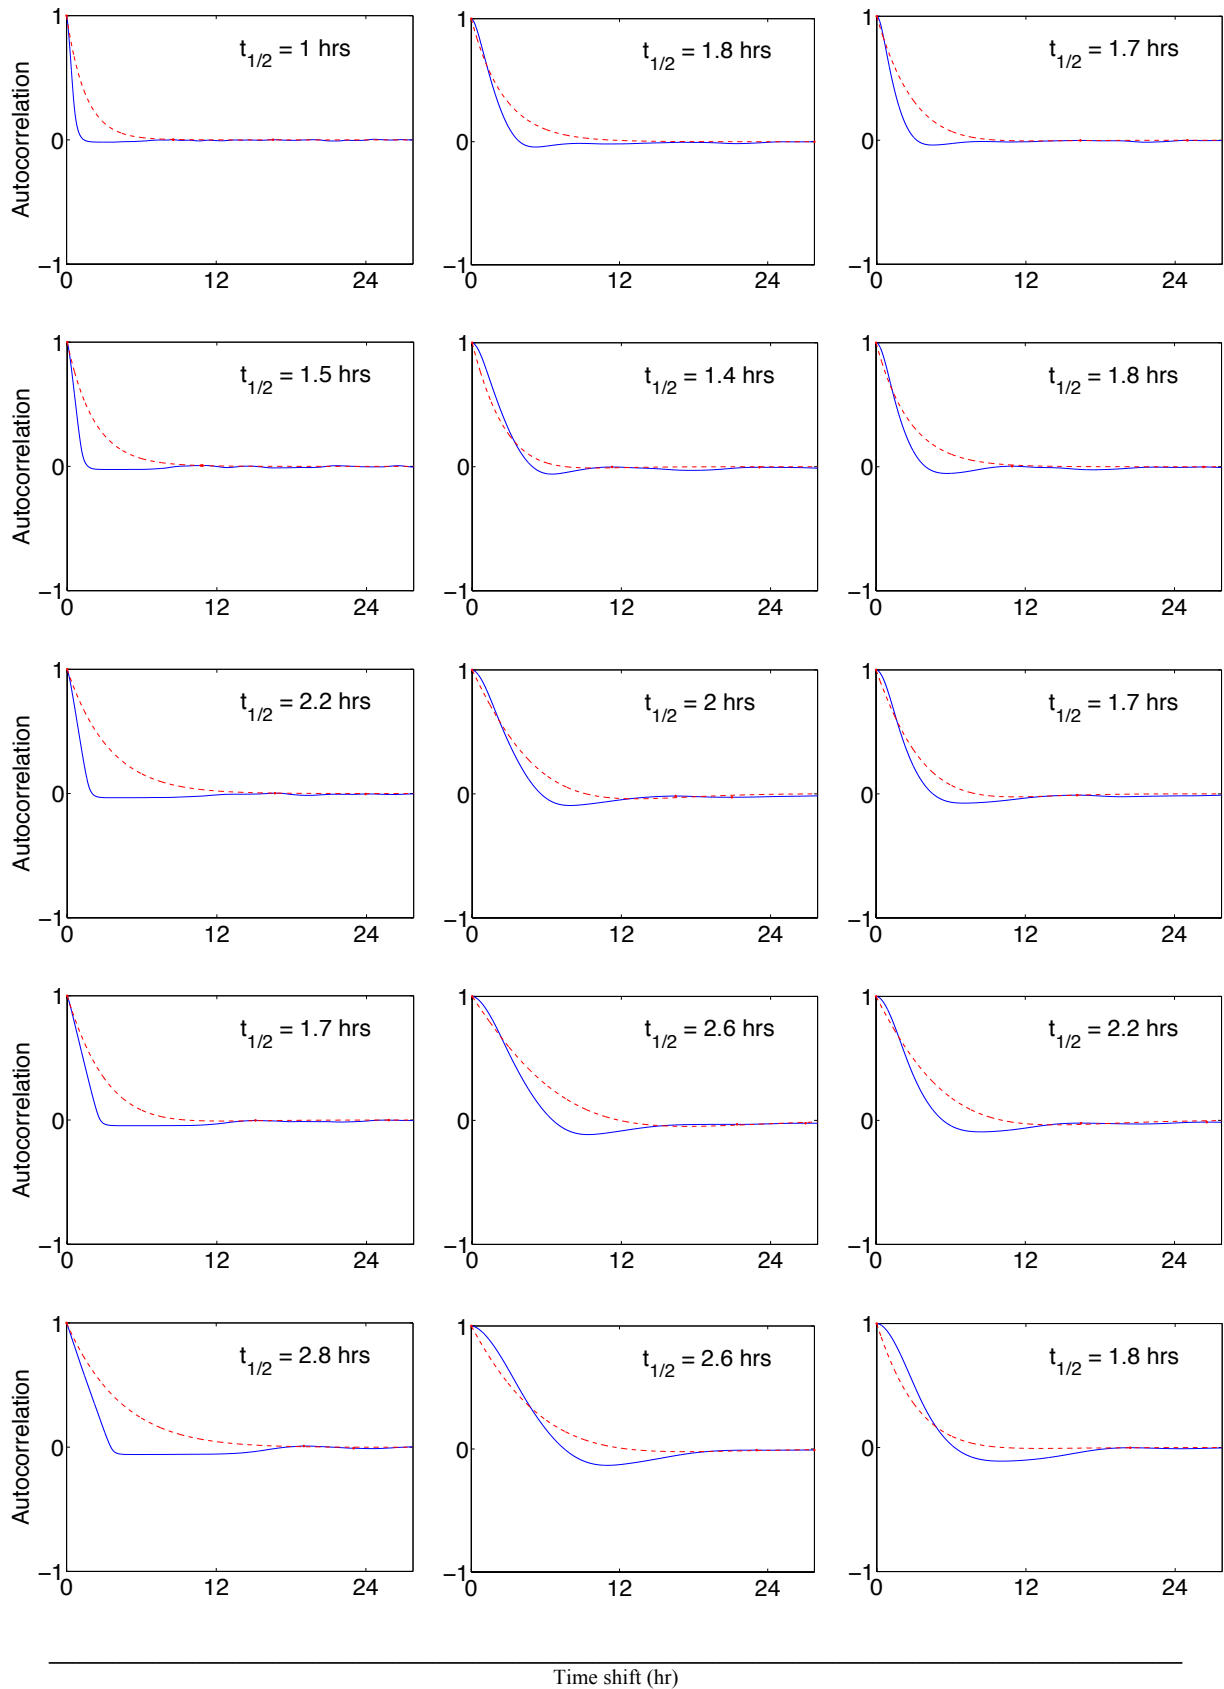

**FIGURE S17** Autocorrelation function half-lives measure memory loss of stochastic oscillations. Each panel shows autocorrelation averaged over 100 stochastic trajectories and its half-lives  $t_{1/2}$  for feedback strength fixed at  $\alpha = 10^{12} \text{ M}^{-1}$ . mRNA, protein and dimer are shown in left, center and right columns, respectively. Each row corresponds to a different feedback transcription delay, from top to bottom:  $\tau_1 = 100 \text{ s}$ ,  $\tau_1 = 300 \text{ s}$ ,  $\tau_1 = 500 \text{ s}$ ,  $\tau_1 = 800 \text{ s}$  and  $\tau_1 = 1200 \text{ s}$ .

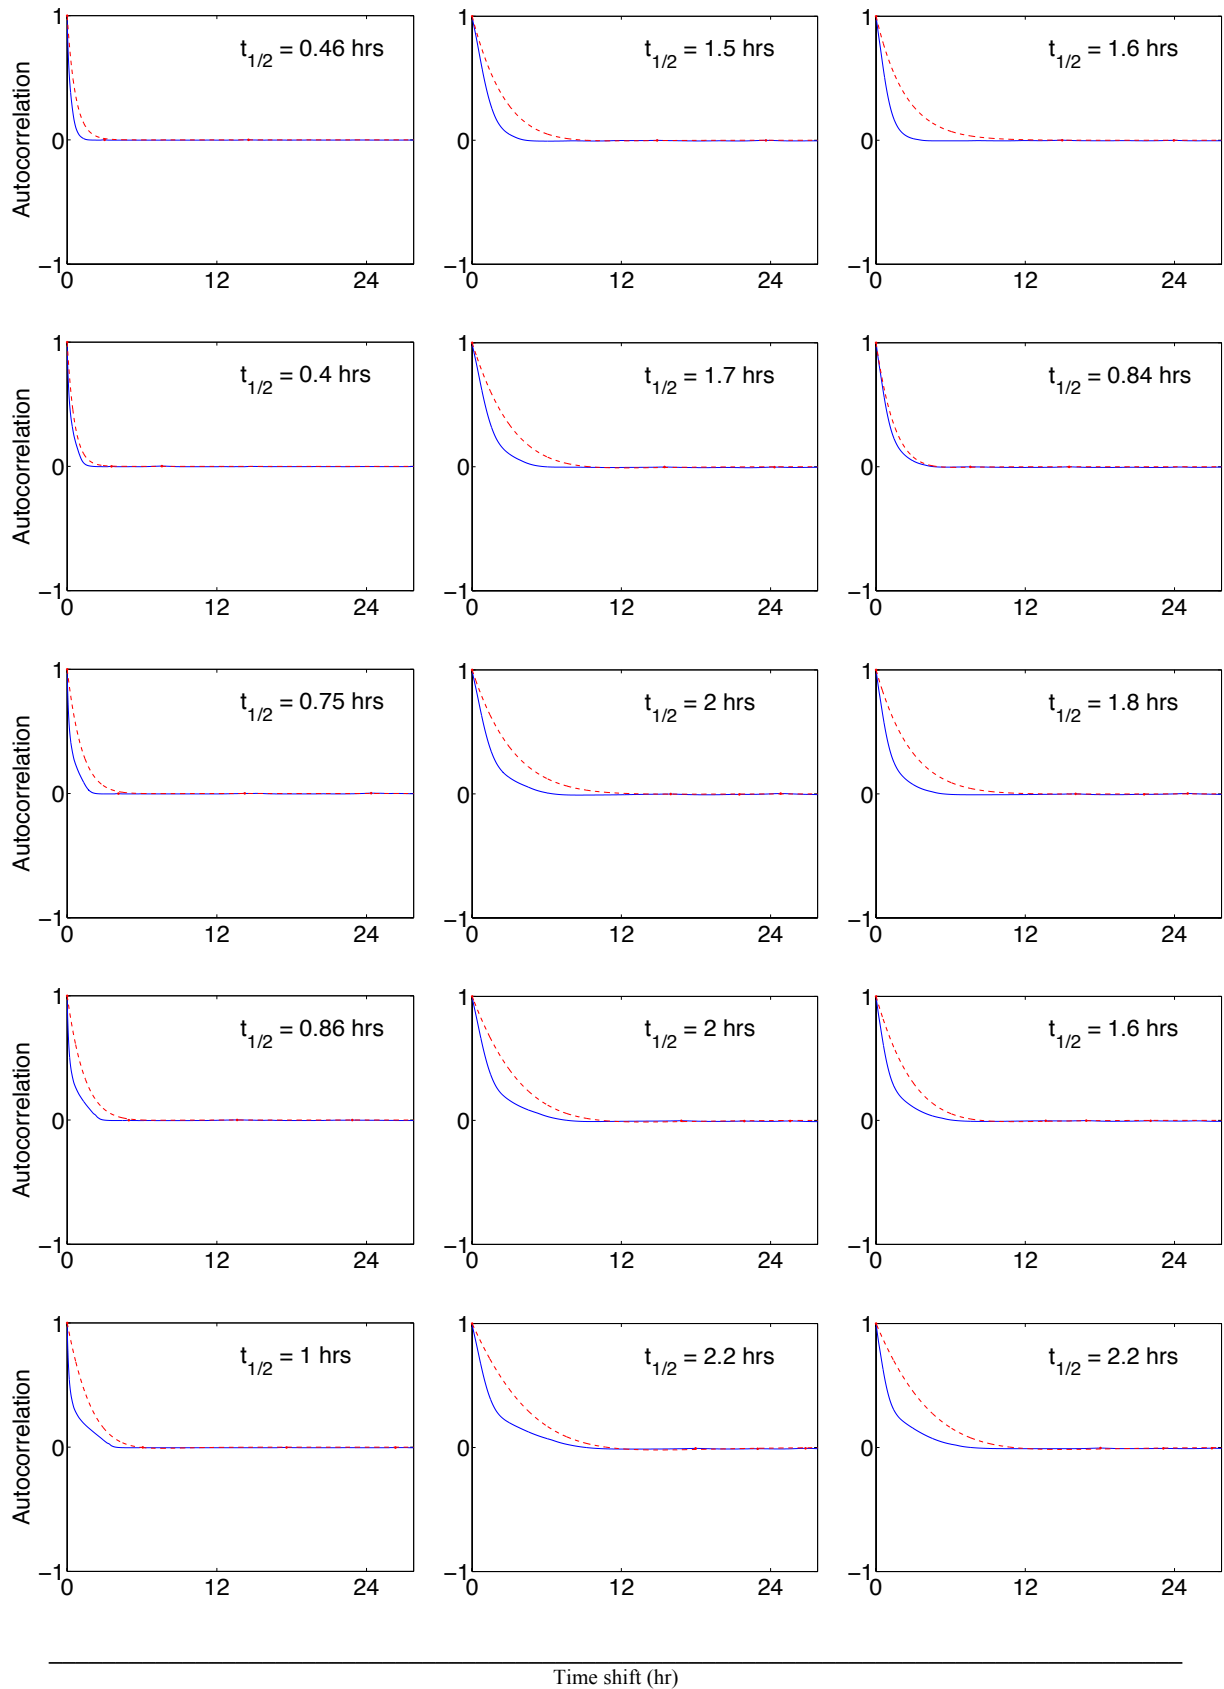

**FIGURE S18** Autocorrelation function half-lives measure memory loss of stochastic oscillations. Each panel shows autocorrelation averaged over 100 stochastic trajectories and its half-lives  $t_{1/2}$  for feedback strength fixed at  $\alpha = 10^{13} \text{ M}^{-1}$ . mRNA, protein and dimer are shown in left, center and right columns, respectively. Each row corresponds to a different feedback transcription delay, from top to bottom:  $\tau_1 = 100$  s,  $\tau_1 = 300$  s,  $\tau_1 = 500$  s,  $\tau_1 = 800$  s and  $\tau_1 = 1200$  s.

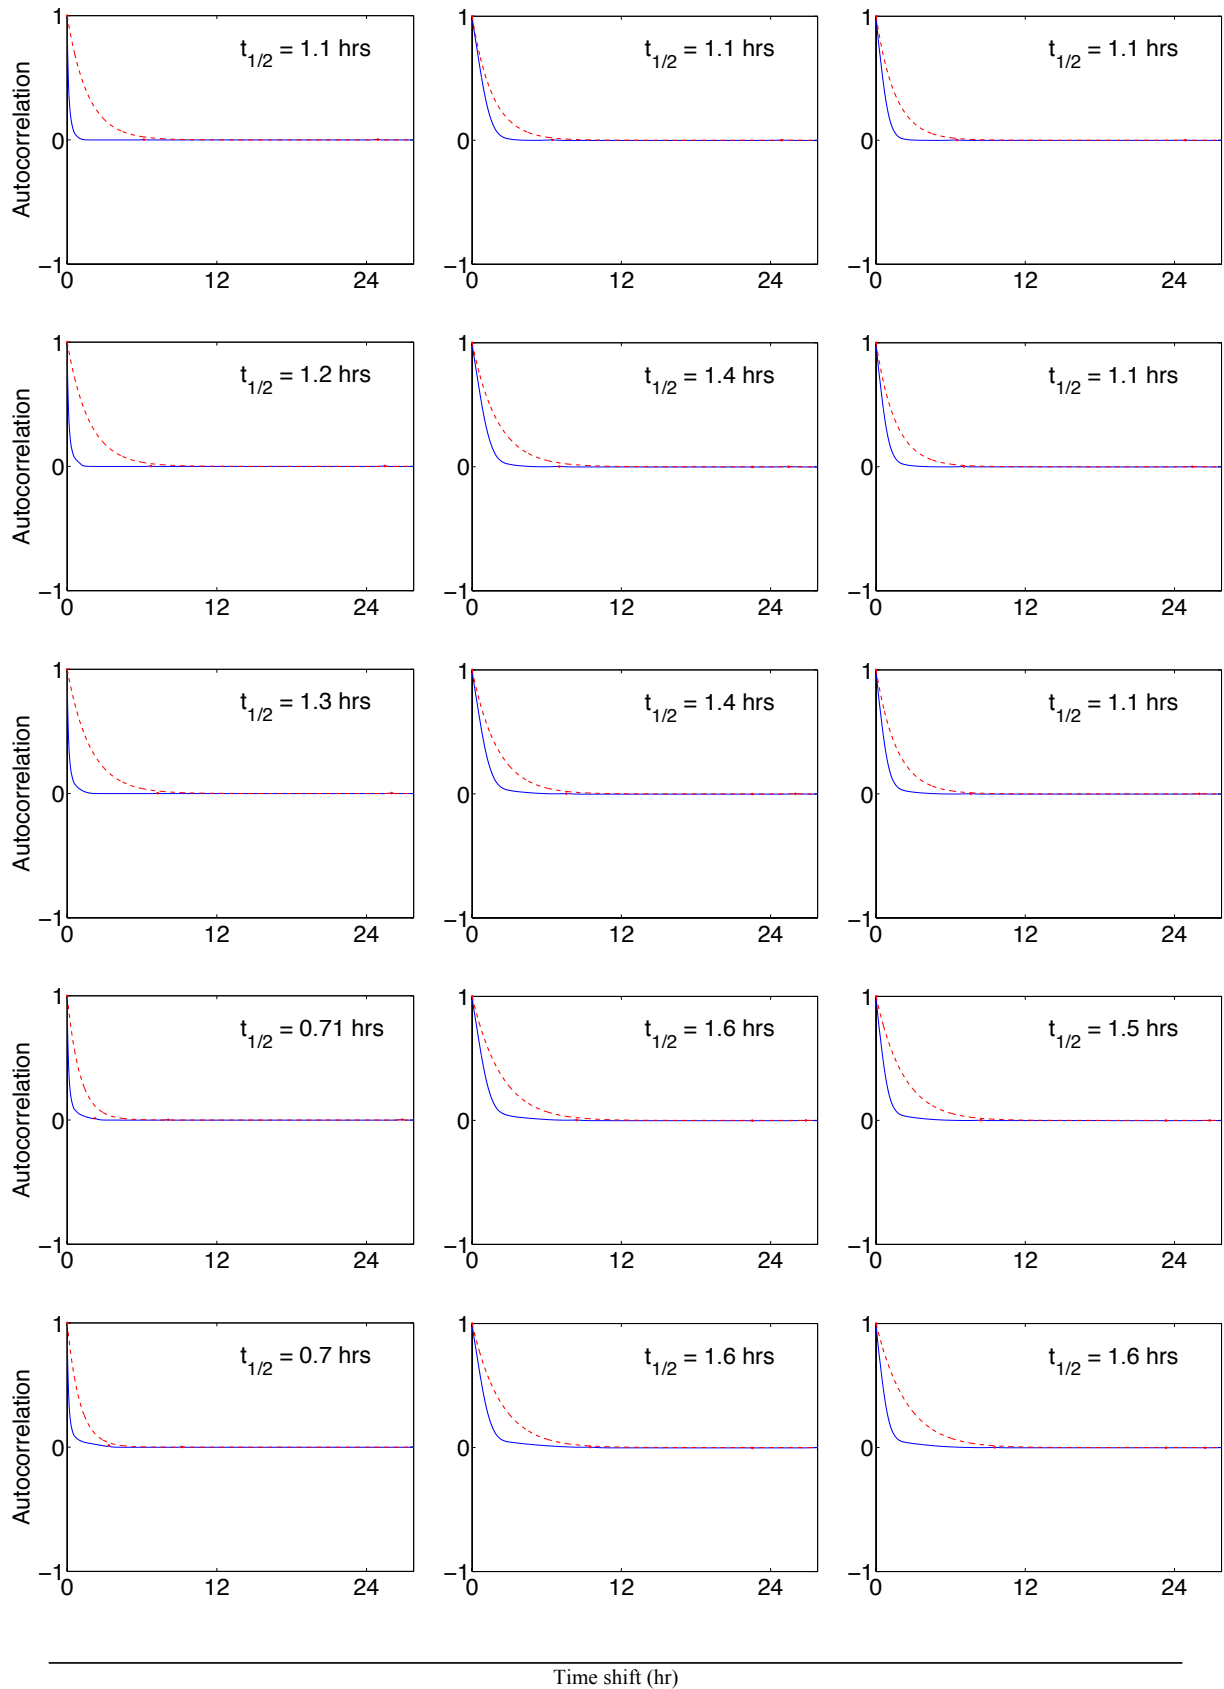

**FIGURE S19** Autocorrelation function half-lives measure memory loss of stochastic oscillations. Each panel shows autocorrelation averaged over 100 stochastic trajectories and its half-lives  $t_{1/2}$  for feedback strength fixed at  $\alpha = 10^{14} \text{ M}^{-1}$ . mRNA, protein and dimer are shown in left, center and right columns, respectively. Each row corresponds to a different feedback transcription delay, from top to bottom:  $\tau_1 = 100$  s,  $\tau_1 = 300$  s,  $\tau_1 = 500$  s,  $\tau_1 = 800$  s and  $\tau_1 = 1200$  s.



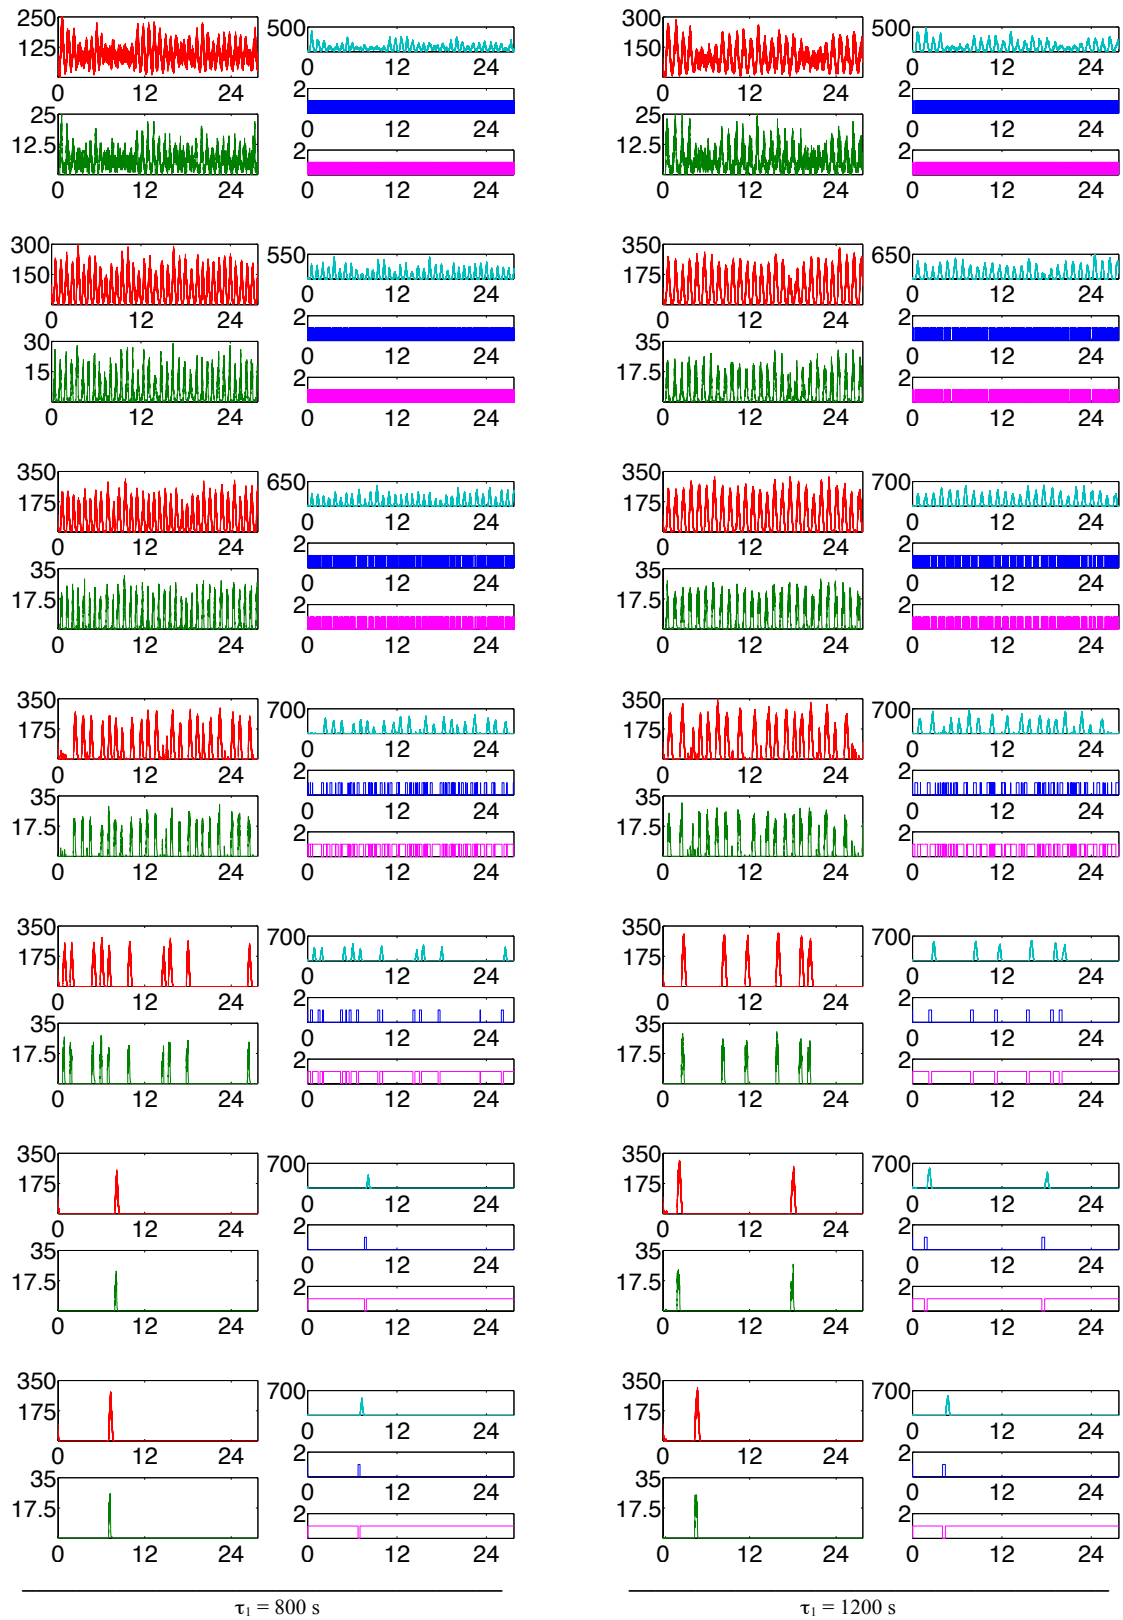

**FIGURE S20** Sample stochastic trajectories showing oscillations (amount of molecules vs. hrs) for a 5 fL volume system. Each row corresponds to a different feedback strength, from top to bottom:  $\alpha = 10^8 \text{ M}^{-1}$ ,  $\alpha = 10^9 \text{ M}^{-1}$ ,  $\alpha = 10^{10} \text{ M}^{-1}$ ,  $\alpha = 10^{11} \text{ M}^{-1}$ ,  $\alpha = 10^{12} \text{ M}^{-1}$ ,  $\alpha = 10^{13} \text{ M}^{-1}$  and  $\alpha = 10^{14} \text{ M}^{-1}$ . Each pair of columns was obtained with a different transcription delay:  $\tau_1 = 800 \text{ s}$ , (*left*) and  $\tau_1 = 1200 \text{ s}$  (*right*). The rest of parameter values were chosen as in Table S1. Protein, mRNA, dimer, DNA and the repressed complex are shown in red, green, teal, blue and pink, respectively.

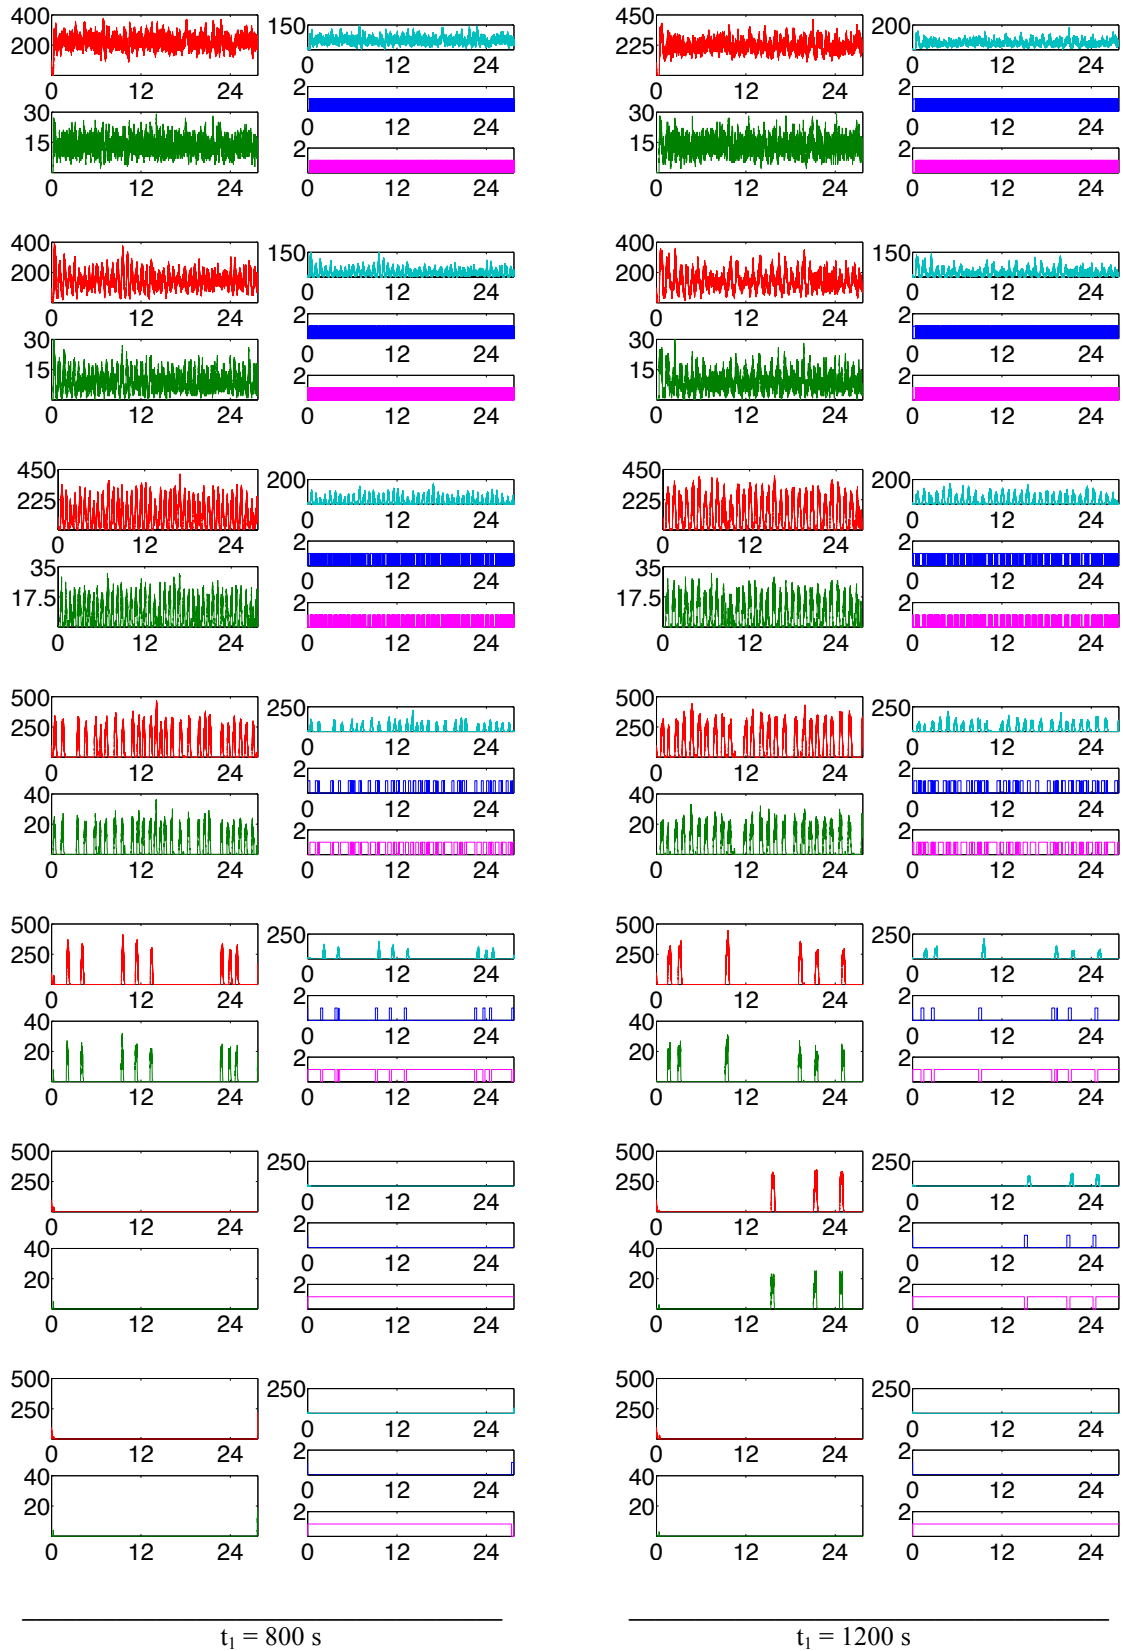

**FIGURE S21** Sample stochastic trajectories showing oscillations (amount of molecules vs. hrs) for a 37 fL volume system. Each row corresponds to a different feedback strength, from top to bottom:  $\alpha = 10^8 \text{ M}^{-1}$ ,  $\alpha = 10^9 \text{ M}^{-1}$ ,  $\alpha = 10^{10} \text{ M}^{-1}$ ,  $\alpha = 10^{11} \text{ M}^{-1}$ ,  $\alpha = 10^{12} \text{ M}^{-1}$ ,  $\alpha = 10^{13} \text{ M}^{-1}$  and  $\alpha = 10^{14} \text{ M}^{-1}$ . Each pair of columns was obtained with a different transcription delay:  $\tau_1 = 800 \text{ s}$ , (*left*) and  $\tau_1 = 1200 \text{ s}$  (*right*). The rest of parameter values were chosen as in Table S1. Protein, mRNA, dimer, DNA and the repressed complex are shown in red, green, teal, blue and pink, respectively.

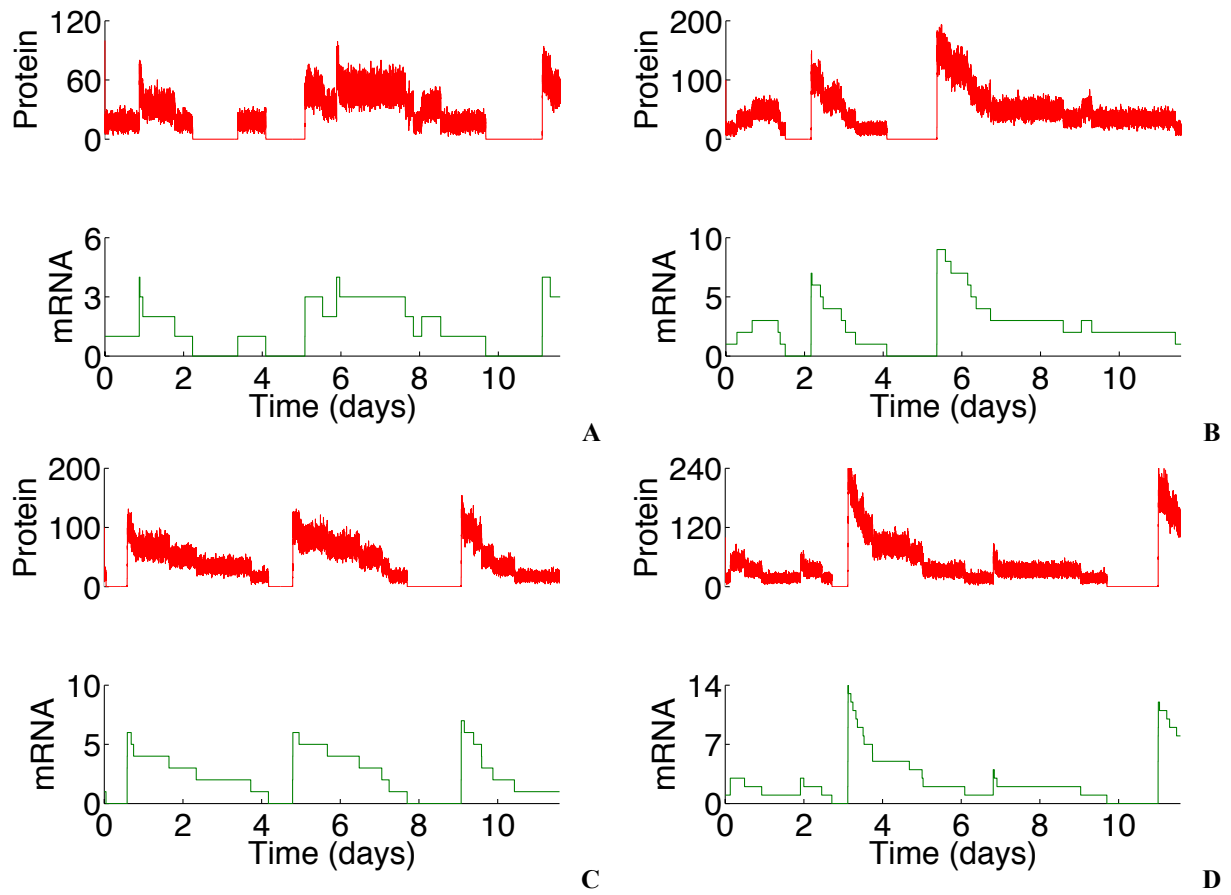

**FIGURE S22** Protein and mRNA sample stochastic trajectories showing multimodality for a 5 fL volume system. Each panel corresponds to (A)  $\tau_1 = 0$  s,  $\tau_2 = 0$  s; (B)  $\tau_1 = 100$  s,  $\tau_2 = 100$  s; (C)  $\tau_1 = 300$  s,  $\tau_2 = 100$  s and (D)  $\tau_1 = 500$  s,  $\tau_2 = 100$  s. The rest of parameter values were chosen as in Table S2.

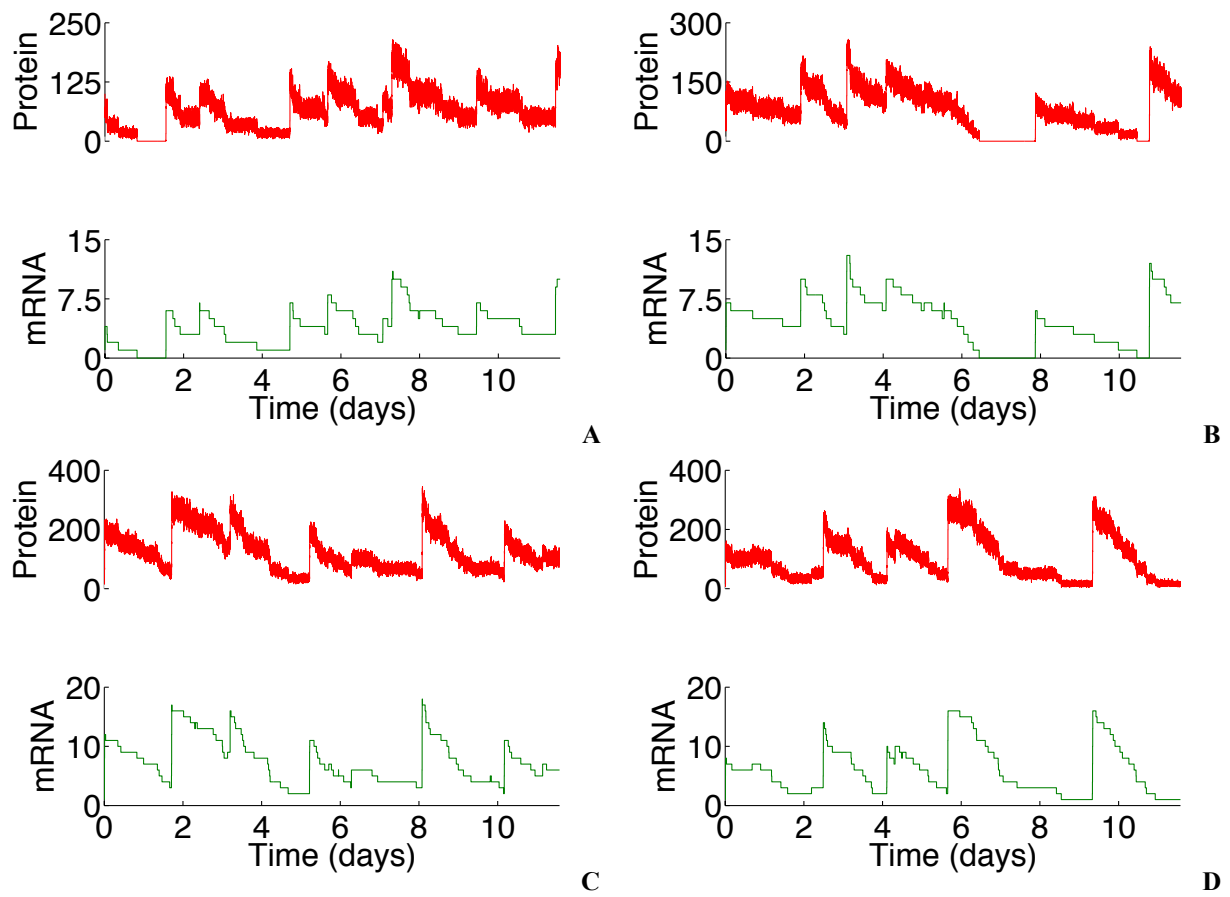

**FIGURE S23** Protein and mRNA sample stochastic trajectories showing multimodality for a 37 fL volume system. Each panel corresponds to (A)  $\tau_1 = 0$  s,  $\tau_2 = 0$  s; (B)  $\tau_1 = 100$  s,  $\tau_2 = 100$  s; (C)  $\tau_1 = 300$  s,  $\tau_2 = 100$  s and (D)  $\tau_1 = 500$  s,  $\tau_2 = 100$  s. The rest of parameter values were chosen as in Table S2.

## References for Supporting Material

1. Marquez-Lago, T. T., and J. Stelling. 2010. Counter-intuitive stochastic behavior of simple gene circuits with negative feedback. *Biophysical journal* 98:1742-1750.
2. Monk, N. A. M. 2003. Oscillatory Expression of Hes1, p53, and NF- $\kappa$ B Driven by Transcriptional Time Delays. *Current Biology* 13:1409-1413.
3. Kubitschek, H., and J. Friske. 1986. Determination of bacterial cell volume with the Coulter Counter. *Journal of bacteriology* 168:1466-1467.
4. Tyson, C. B., P. G. Lord, and A. E. Wheals. 1979. Dependency of size of *Saccharomyces cerevisiae* cells on growth rate. *Journal of bacteriology* 138:92-98.
5. Kuznetsov, I. U. A. 1998. *Elements of applied bifurcation theory*. Springer.
6. Cai, X. 2007. Exact stochastic simulation of coupled chemical reactions with delays. *The Journal of chemical physics* 126:124108.
7. Barrio, M., K. Burrage, A. Leier, and T. Tian. 2006. Oscillatory regulation of Hes1: discrete stochastic delay modelling and simulation. *PLoS computational biology* 2:e117.
